# Supplementary material for: Elevation Influences Belowground Biomass Proportion in Forests by Affecting Climatic Factors, Soil Nutrients and Key Leaf Traits
Source: MDPI journal article supplement (doi:10.3390/plants13050674), 2024-02-28
Supplement: s1 [file s1]

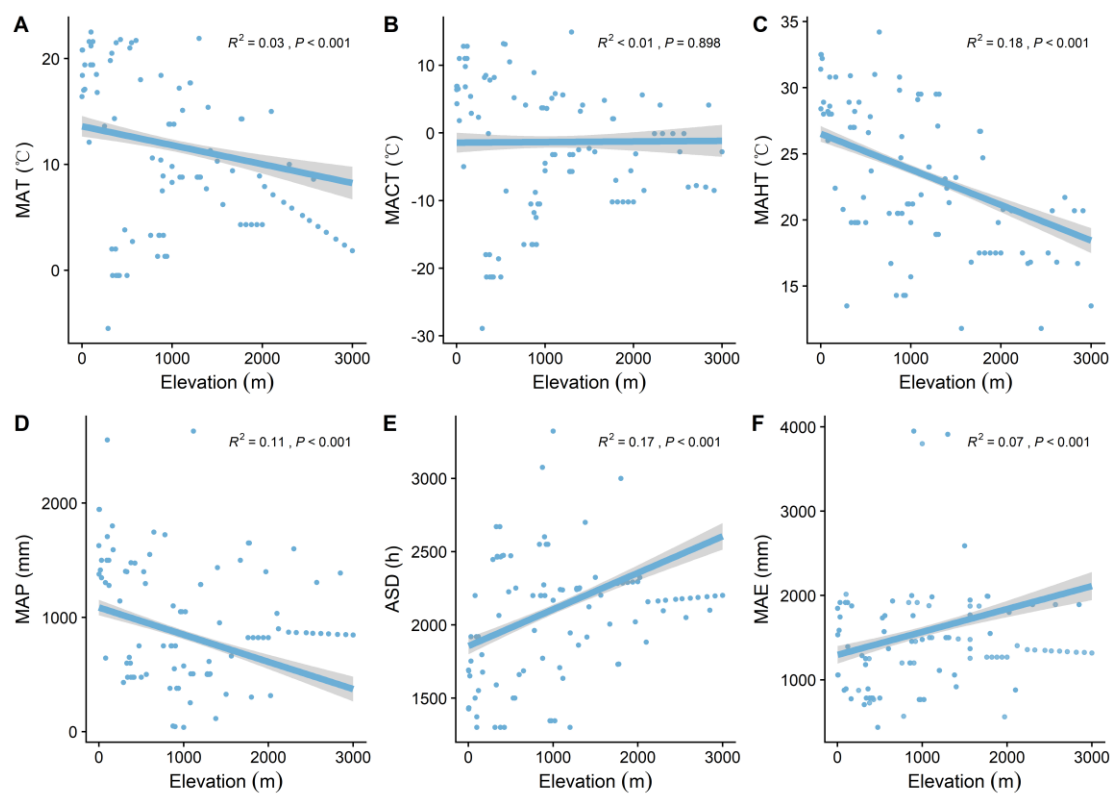

Figure S1 Linear relationship between elevation and climatic factors

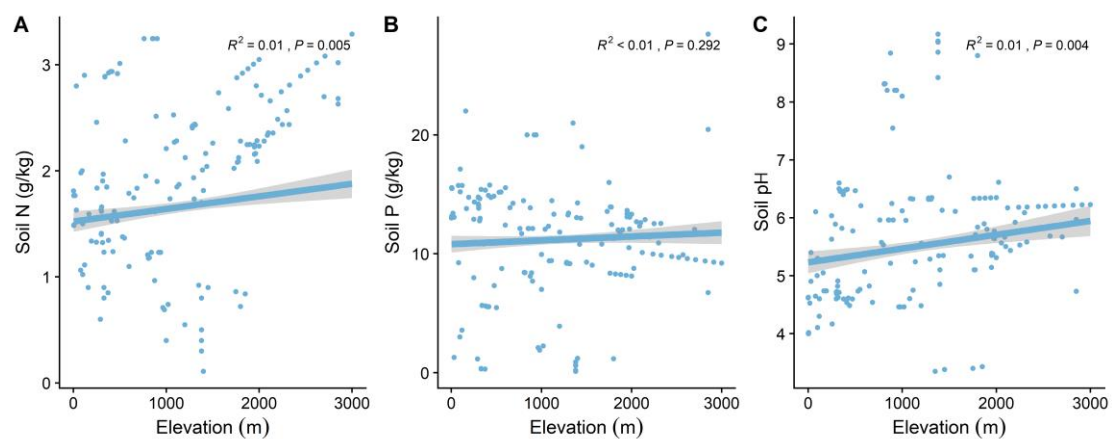

Figure S2 Linear relationship between elevation and soil nutrients

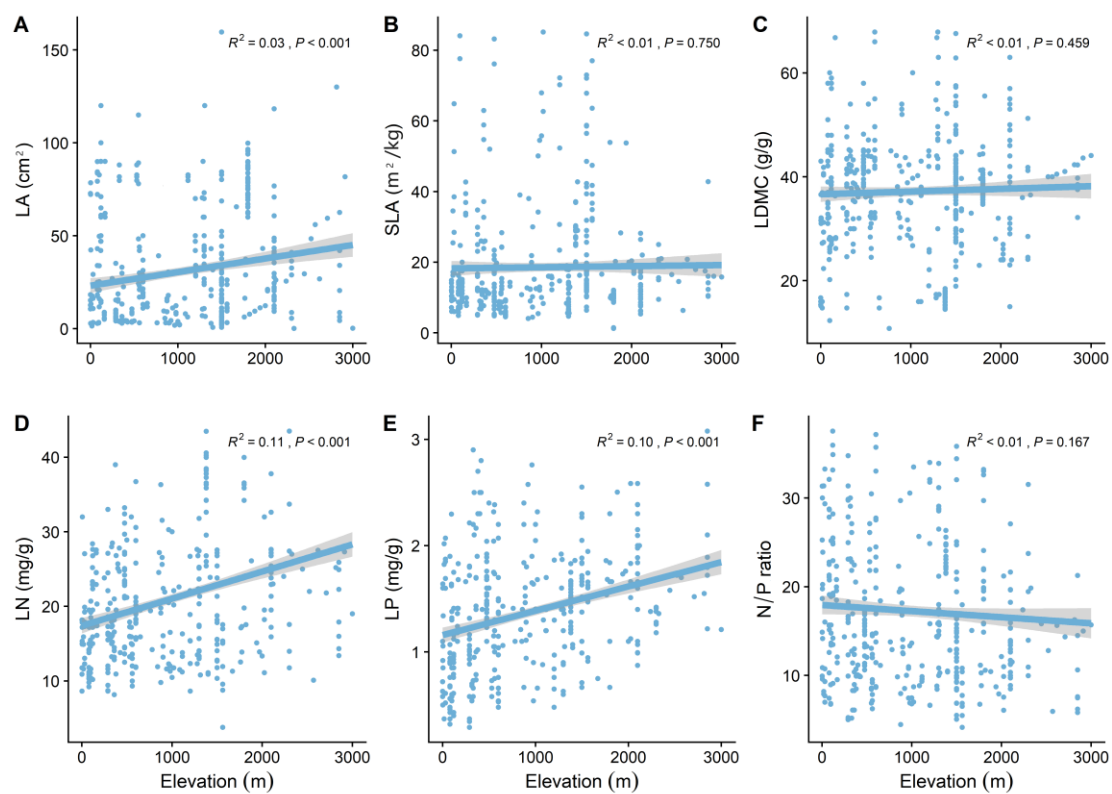

Figure S3 Linear relationship between elevation and leaf functional traits
