# Supplementary material for: Elevation Influences Belowground Biomass Proportion in Forests by Affecting Climatic Factors, Soil Nutrients and Key Leaf Traits
Source: Plants (Basel). 2024 Feb 28;13(5):674. doi: 10.3390/plants13050674 (PMC10935182; doi:10.3390/plants13050674)
Supplement: Supplementary file 1 [file plants-13-00674-s001.zip › Table S1.xls]

## Sheet: Sheet1
Forest Type	Longitude	Latitude	Soil.N	Soil.P	Soil.PH	MAT	MACT	MAHT	MAP	Annual average sunshine duration	Average annual evaporation	LA	SLA	LDMC	LN	LP	Survey Month	Survey Year	Data Source	Author	site	Total Biomass(tons/hectare)	AGB(tons/hectare)	AGBP	BGB (tons/hectare)	BGBP	R/S
Broadleaved	122.344	53.4683	0.6	1.15714	5.89	-5.5	-28.9	13.5	430	2446.4	1287	35.1218	18.266	32.9247	33	1.80664	7	2014	Authors	unpublished	Mohe	287.1	177.859	61.9501	109.241	38.0499	0.614203
Broadleaved	122.344	53.4683	0.6	1.15714	5.89	-5.5	-28.9	13.5	430	2446.4	1287	4.115	15.9552	40.5286	19.6	1.22844	7	2014	Authors	unpublished	Mohe	287.1	177.859	61.9501	109.241	38.0499	0.614203
Broadleaved	122.344	53.4683	0.6	1.15714	5.89	-5.5	-28.9	13.5	430	2446.4	1287	15.3316	12.3135	41.5033	16.2	1.31562	7	2014	Authors	unpublished	Mohe	287.1	177.859	61.9501	109.241	38.0499	0.614203
Broadleaved	122.344	53.4683	0.6	1.15714	5.89	-5.5	-28.9	13.5	430	2446.4	1287	8.865	5.23043	43.4045	9.4	1.79718	7	2014	Authors	unpublished	Mohe	287.1	177.859	61.9501	109.241	38.0499	0.614203
Broadleaved	122.344	53.4683	0.6	1.15714	5.89	-5.5	-28.9	13.5	430	2446.4	1287	8.169	24.9725	33.1367	22.1	0.884972	7	2014	Authors	unpublished	Mohe	287.1	177.859	61.9501	109.241	38.0499	0.614203
Broadleaved	122.344	53.4683	0.6	1.15714	5.89	-5.5	-28.9	13.5	430	2446.4	1287	7.974	23.0991	32.6323	24.5	1.06065	7	2014	Authors	unpublished	Mohe	287.1	177.859	61.9501	109.241	38.0499	0.614203
Broadleaved	122.344	53.4683	0.6	1.15714	5.89	-5.5	-28.9	13.5	430	2446.4	1287	6.8	16.6531	38.1131	15.5	0.930759	7	2014	Authors	unpublished	Mohe	287.1	177.859	61.9501	109.241	38.0499	0.614203
Broadleaved	122.344	53.4683	0.6	1.15714	5.89	-5.5	-28.9	13.5	430	2446.4	1287	6.56	5.0618	47.7118	8.7	1.71876	7	2014	Authors	unpublished	Mohe	287.1	177.859	61.9501	109.241	38.0499	0.614203
Broadleaved	122.344	53.4683	0.6	1.15714	5.89	-5.5	-28.9	13.5	430	2446.4	1287	6.25	18.0729	38.4909	18.5	1.02363	7	2014	Authors	unpublished	Mohe	287.1	177.859	61.9501	109.241	38.0499	0.614203
Broadleaved	122.344	53.4683	0.6	1.15714	5.89	-5.5	-28.9	13.5	430	2446.4	1287	5.94	16.3416	38.6091	16.4	1.00358	7	2014	Authors	unpublished	Mohe	287.1	177.859	61.9501	109.241	38.0499	0.614203
Broadleaved	122.344	53.4683	0.6	1.15714	5.89	-5.5	-28.9	13.5	430	2446.4	1287	5.94	27.8557	31.6162	27.1	0.972871	7	2014	Authors	unpublished	Mohe	287.1	177.859	61.9501	109.241	38.0499	0.614203
Broadleaved	122.344	53.4683	0.6	1.15714	5.89	-5.5	-28.9	13.5	430	2446.4	1287	5.757	15.9965	41.3601	18.6	1.16275	7	2014	Authors	unpublished	Mohe	287.1	177.859	61.9501	109.241	38.0499	0.614203
Coniferous	106.9	21.8	1.23747	15.7754	4.61358	21.8	8.2	28.9	1475	1300	765	3.54	52	32	13.8	1.4	7	2012	Authors	unpublished	Changbai mountains	410.09	274.637	66.97	135.453	33.03	0.493207
Broadleaved	122.344	53.4683	0.6	1.15714	5.89	-5.5	-28.9	13.5	430	2446.4	1287	5.54	34.7698	24.602	12	0.345127	7	2014	Authors	unpublished	Mohe	287.1	177.859	61.9501	109.241	38.0499	0.614203
Broadleaved	122.344	53.4683	0.6	1.15714	5.89	-5.5	-28.9	13.5	430	2446.4	1287	5.297	5.01557	49.586	11.1	2.21311	7	2014	Authors	unpublished	Mohe	287.1	177.859	61.9501	109.241	38.0499	0.614203
Broadleaved	122.344	53.4683	0.6	1.15714	5.89	-5.5	-28.9	13.5	430	2446.4	1287	5.059	29.8627	29.0609	17.3	0.579317	7	2014	Authors	unpublished	Mohe	287.1	177.859	61.9501	109.241	38.0499	0.614203
Coniferous	109.1	23.05	1.34455	15.3488	4.59817	21.5	7.8	28.2	1477.8	1300	725	22.5	10.02	40.73	10.92	1.02	7	2013	Authors	unpublished	Gongga Mountain	418.52	328.253	78.4318	90.2672	21.5682	0.274993
Broadleaved	121.69	49.477	1.23126	20	8.2	1.3	-10.5	14.3	378.5	2550	1456	4.341	15.1609	37.08	21.9172	2.575	7	2018	Authors	unpublished	Yakushi forest area	312.41	222.443	71.2022	89.9671	28.7978	0.40445
Broadleaved	126.257	48.79	2.93669	5.552	6.47931	-0.5	-21.3	19.8	476.33	2472.2	782.3	4.3	11.3	41.3	25.7	2.3	7	2016	Literatures	Huang et al., 2016	five connected lakes	285.37	193.176	67.693	92.1943	32.3069	0.477256
Broadleaved	126.257	48.79	2.93669	5.552	6.47931	-0.5	-21.3	19.8	476.33	2472.2	782.3	4.25	11.5	38	25.1	2.5	7	2016	Literatures	Huang et al., 2016	five connected lakes	285.37	193.176	67.693	92.1943	32.3069	0.477256
Broadleaved	126.04	48.745	2.93577	5.55409	6.49114	-0.5	-21.3	19.8	476.33	2474.58	782.3	4.2	11.2	37.5	27.8	2.8	7	2016	Literatures	Huang et al., 2016	five connected lakes	278.54	189.202	67.9262	89.3383	32.0738	0.472185
Broadleaved	126.04	48.745	2.93577	5.55409	6.49114	-0.5	-21.3	19.8	476.33	2474.58	782.3	4.2	11.1	36.1	24.7	2.5	7	2016	Literatures	Huang et al., 2016	five connected lakes	278.54	189.202	67.9262	89.3383	32.0738	0.472185
Broadleaved	126.4	48.72	3.01276	5.47858	6.46605	-0.5	-21.3	19.8	476.33	2471.5	782.3	4.154	19.8	36.3	21.2	1.6	7	2016	Literatures	Huang et al., 2016	five connected lakes	248.91	168.286	67.6093	80.6237	32.3907	0.479087
Broadleaved	126.4	48.72	3.01276	5.47858	6.46605	-0.5	-21.3	19.8	476.33	2471.5	782.3	4.136	18.3	36.1	28.9	2.4	7	2016	Literatures	Huang et al., 2016	five connected lakes	248.91	168.286	67.6093	80.6237	32.3907	0.479087
Broadleaved	126.118	48.708	2.88484	5.64314	6.47597	-0.5	-21.3	19.8	476.33	2467.77	782.3	4.107	11.3	42.1	15.2	2.5	7	2016	Literatures	Huang et al., 2016	five connected lakes	261.8	177.649	67.8569	84.1506	32.1431	0.473689
Broadleaved	126.118	48.708	2.88484	5.64314	6.47597	-0.5	-21.3	19.8	476.33	2467.77	782.3	4.1	14.1	37.8	16.1	0.95	7	2016	Literatures	Huang et al., 2016	five connected lakes	261.8	177.649	67.8569	84.1506	32.1431	0.473689
Broadleaved	126.368	48.679	2.92438	5.61415	6.45592	-0.5	-21.3	19.8	476.33	2464.14	782.3	4.088	12.1	38.6	19.5	2.3	7	2016	Literatures	Huang et al., 2016	five connected lakes	268.73	181.686	67.6093	87.0436	32.3907	0.479087
Broadleaved	126.368	48.679	2.92438	5.61415	6.45592	-0.5	-21.3	19.8	476.33	2464.14	782.3	4.057	12	35.2	26.8	2.7	7	2016	Literatures	Huang et al., 2016	five connected lakes	268.73	181.686	67.6093	87.0436	32.3907	0.479087
Broadleaved	126.275	48.6536	2.89067	5.6638	6.45733	-0.5	-21.3	19.8	476.33	2462.55	782.3	4.051	12.2	42.2	17.4	2.1	7	2016	Literatures	Huang et al., 2016	five connected lakes	262.96	178.11	67.7326	84.8505	32.2674	0.476395
Broadleaved	126.275	48.6536	2.89067	5.6638	6.45733	-0.5	-21.3	19.8	476.33	2462.55	782.3	3.941	10.8	41.1	28.5	2.5	7	2016	Literatures	Huang et al., 2016	five connected lakes	262.96	178.11	67.7326	84.8505	32.2674	0.476395
Broadleaved	129.3	46.6	0.9	0.357143	6.5	2	-18	27	600	2670	1250	3.91	26	30	15	2.9	8	2016	Literatures	Zhang et al., 2016	Heilongjiang	352.3	228.905	64.9746	123.395	35.0254	0.539064
Broadleaved	129.3	46.6	0.8	0.314286	6.6	2	-18	27	600	2670	1250	3.844	26	30	28	2.2	8	2016	Literatures	Zhang et al., 2016	Heilongjiang	352.3	228.905	64.9746	123.395	35.0254	0.539064
Broadleaved	129.3	46.6	0.85	0.3	6.4	2	-18	27	600	2670	1250	3.835	26	30	39	1.9	8	2016	Literatures	Zhang et al., 2016	Heilongjiang	352.3	228.905	64.9746	123.395	35.0254	0.539064
Broadleaved	127.73	43.95	2.91653	7.31499	5.77401	3.8	-18.6	21.7	750	2225.47	435	3.803	16.75	41.18	21.14	1.45	7	2012	Literatures	Xia et al., 2012	Jiaohe	341.35	256.902	75.2605	84.4482	24.7395	0.328718
Coniferous	127.73	43.95	2.91653	7.31499	5.77401	3.8	-18.6	21.7	750	2225.47	435	3.8	8.8	43.32	23.44	1.55	7	2012	Literatures	Xia et al., 2012	Jiaohe	341.35	256.902	75.2605	84.4482	24.7395	0.328718
Broadleaved	127.73	43.95	2.91653	7.31499	5.77401	3.8	-18.6	21.7	750	2225.47	435	3.8	11.35	41.82	23.35	1.44	7	2012	Literatures	Xia et al., 2012	Jiaohe	341.35	256.902	75.2605	84.4482	24.7395	0.328718
Coniferous	127.73	43.95	2.91653	7.31499	5.77401	3.8	-18.6	21.7	750	2225.47	435	3.796	76.12	44.09	25.06	1.68	7	2012	Literatures	Xia et al., 2012	Jiaohe	341.35	256.902	75.2605	84.4482	24.7395	0.328718
Coniferous	127.73	43.95	2.91653	7.31499	5.77401	3.8	-18.6	21.7	750	2225.47	435	3.792	4.81	45.18	13.62	1.23	7	2012	Literatures	Xia et al., 2012	Jiaohe	341.35	256.902	75.2605	84.4482	24.7395	0.328718
Coniferous	127.73	43.95	2.91653	7.31499	5.77401	3.8	-18.6	21.7	750	2225.47	435	3.682	7.69	43.43	21.11	1.6	7	2012	Literatures	Xia et al., 2012	Jiaohe	341.35	256.902	75.2605	84.4482	24.7395	0.328718
Broadleaved	127.73	43.95	2.91653	7.31499	5.77401	3.8	-18.6	21.7	750	2225.47	435	3.62	18.763	48.22	31.15	1.85	7	2012	Literatures	Xia et al., 2012	Jiaohe	341.35	256.902	75.2605	84.4482	24.7395	0.328718
Coniferous	127.73	43.95	2.91653	7.31499	5.77401	3.8	-18.6	21.7	750	2225.47	435	3.569	20.81	40.59	24.2	1.53	7	2012	Literatures	Xia et al., 2012	Jiaohe	341.35	256.902	75.2605	84.4482	24.7395	0.328718
Broadleaved	127.73	43.95	2.91653	7.31499	5.77401	3.8	-18.6	21.7	750	2225.47	435	3.53	9.6	41.96	26.99	1.7	7	2012	Literatures	Xia et al., 2012	Jiaohe	341.35	256.902	75.2605	84.4482	24.7395	0.328718
Broadleaved	127.73	43.95	2.91653	7.31499	5.77401	3.8	-18.6	21.7	750	2225.47	435	3.523	12.9	41.64	22.81	1.4	7	2012	Literatures	Xia et al., 2012	Jiaohe	341.35	256.902	75.2605	84.4482	24.7395	0.328718
Coniferous	127.73	43.95	2.91653	7.31499	5.77401	3.8	-18.6	21.7	750	2225.47	435	3.52	83.17	44.04	23.06	1.32	7	2012	Literatures	Xia et al., 2012	Jiaohe	341.35	256.902	75.2605	84.4482	24.7395	0.328718
Coniferous	127.73	43.95	2.91653	7.31499	5.77401	3.8	-18.6	21.7	750	2225.47	435	3.506	5.33	44.85	14.41	1.3	7	2012	Literatures	Xia et al., 2012	Jiaohe	341.35	256.902	75.2605	84.4482	24.7395	0.328718
Coniferous	127.73	43.95	2.91653	7.31499	5.77401	3.8	-18.6	21.7	750	2225.47	435	3.502	10.11	39.52	23.18	1.71	7	2012	Literatures	Xia et al., 2012	Jiaohe	341.35	256.902	75.2605	84.4482	24.7395	0.328718
Coniferous	127.73	43.95	2.91653	7.31499	5.77401	3.8	-18.6	21.7	750	2225.47	435	3.497	17.35	42.81	32.39	1.89	7	2012	Literatures	Xia et al., 2012	Jiaohe	341.35	256.902	75.2605	84.4482	24.7395	0.328718
Coniferous	117.401	23.474	1.48438	15.5607	3.99748	20.8	6.9	32.5	1945	1425.95	1056	2.8	10.44	32.1	14.93	1.05536	7	2013	Literatures	Peng et al.,2013	Gongga Mountain	451.85	287.276	63.5777	164.574	36.4223	0.572878
Broadleaved	127.73	43.95	2.91653	7.31499	5.77401	3.8	-18.6	21.7	750	2225.47	435	3.42	21.95	38.56	27.25	1.46	7	2012	Literatures	Xia et al., 2012	Jiaohe	341.35	256.902	75.2605	84.4482	24.7395	0.328718
Coniferous	127.73	43.95	2.91653	7.31499	5.77401	3.8	-18.6	21.7	750	2225.47	435	3.413	10.4	38.17	29.67	1.76	7	2012	Literatures	Xia et al., 2012	Jiaohe	341.35	256.902	75.2605	84.4482	24.7395	0.328718
Coniferous	127.73	43.95	2.91653	7.31499	5.77401	3.8	-18.6	21.7	750	2225.47	435	3.411	13.79	38.86	22.97	1.48	7	2012	Literatures	Xia et al., 2012	Jiaohe	341.35	256.902	75.2605	84.4482	24.7395	0.328718
Broadleaved	127.73	43.95	2.91653	7.31499	5.77401	3.8	-18.6	21.7	750	2225.47	435	3.41	9.31	41.78	23.39	1.44	7	2012	Literatures	Xia et al., 2012	Jiaohe	341.35	256.902	75.2605	84.4482	24.7395	0.328718
Broadleaved	127.73	43.95	2.91653	7.31499	5.77401	3.8	-18.6	21.7	750	2225.47	435	3.401	6.69	41.7	14.55	1.37	7	2012	Literatures	Xia et al., 2012	Jiaohe	341.35	256.902	75.2605	84.4482	24.7395	0.328718
Coniferous	127.73	43.95	2.91653	7.31499	5.77401	3.8	-18.6	21.7	750	2225.47	435	3.395	11.61	37.16	24.87	2.04	7	2012	Literatures	Xia et al., 2012	Jiaohe	341.35	256.902	75.2605	84.4482	24.7395	0.328718
Coniferous	127.73	43.95	2.91653	7.31499	5.77401	3.8	-18.6	21.7	750	2225.47	435	3.388	23.39	42.14	33.23	1.92	7	2012	Literatures	Xia et al., 2012	Jiaohe	341.35	256.902	75.2605	84.4482	24.7395	0.328718
Coniferous	108.3	25.1	1.32245	14.6333	4.90831	19.8	8.2	28.9	1402	1300	705	18.7	6.8	41.2	20.4	0.68	7	2017	Literatures	Huang et al., 2017	Fujian Pingtan Island	207.31	161.594	77.9479	45.7163	22.0521	0.282909
Coniferous	108.3	25.1	1.32245	14.6333	4.90831	19.8	8.2	28.9	1402	1300	705	15.7	9	42.4	15.7	0.54	7	2017	Literatures	Huang et al., 2017	Fujian Pingtan Island	207.31	161.594	77.9479	45.7163	22.0521	0.282909
Coniferous	108.3	25.1	1.32245	14.6333	4.90831	19.8	8.2	28.9	1402	1300	705	14.8	12	45.2	16.2	0.7	7	2017	Literatures	Huang et al., 2017	Fujian Pingtan Island	207.31	161.594	77.9479	45.7163	22.0521	0.282909
Coniferous	119.7	25.5	2	3	5	19.4	11	28	1500	1919.7	1917.4	3.384	11.5	32.1804	15.4698	2.29692	7	2016	Authors	unpublished	Beijing Songshan	404.51	316.828	78.3238	87.6824	21.6762	0.276751
Coniferous	119.7	25.5	2.8	1.28571	5.4	19.4	11	28	1500	1919.7	1917.4	3.3	6	41.8	17.9	0.61	7	2017	Authors	unpublished	Fujian Pingtan Island	404.51	316.828	78.3238	87.6824	21.6762	0.276751
Coniferous	119.7	25.5	2.8	1.28571	5.4	19.4	11	28	1500	1919.7	1917.4	3.299	51.2963	29.3478	12.292	1.59868	7	2017	Authors	unpublished	Beijing Songshan	404.51	316.828	78.3238	87.6824	21.6762	0.276751
Coniferous	119.7	25.5	2	3	5	19.4	11	28	1500	1919.7	1917.4	3.25	84.0794	24.0458	14.634	1.63705	7	2017	Authors	unpublished	Beijing Songshan	404.51	316.828	78.3238	87.6824	21.6762	0.276751
Coniferous	119.7	25.5	2.8	1.28571	5.4	19.4	11	28	1500	1919.7	1917.4	3.183	64.859	27.3684	13.039	1.87228	7	2017	Authors	unpublished	Beijing Songshan	404.51	316.828	78.3238	87.6824	21.6762	0.276751
Coniferous	119.7	25.5	2	3	5	19.4	11	28	1500	1919.7	1917.4	3.053	77.5893	28	11.083	1.62259	7	2017	Authors	unpublished	Beijing Songshan	404.51	316.828	78.3238	87.6824	21.6762	0.276751
Coniferous	119.7	25.5	2.8	1.28571	5.4	19.4	11	28	1500	1919.7	1917.4	16.26	9.5	40.6	17.3	0.52	7	2017	Authors	unpublished	Fujian Pingtan Island	404.51	316.828	78.3238	87.6824	21.6762	0.276751
Broadleaved	128.1	42.4	3.24624	12.1286	5.96	3.3	-16.5	20.5	750	2200	1200	3.13	30	52	22.4	1.8	7	2012	Authors	unpublished	Changbai mountains	333.4	259.141	77.7268	74.2587	22.2732	0.286557
Broadleaved	128.1	42.4	3.24624	12.1286	5.96	3.3	-16.5	20.5	750	2200	1200	3.127	39	10.8	19.4	1.41	7	2012	Authors	unpublished	Changbai mountains	333.4	259.141	77.7268	74.2587	22.2732	0.286557
Coniferous	106.2	27.2	0.69	1.9	4.46	13.8	3.7	21.2	1050	1345	766.1	12.3	12.1	35.3	12	0.9	7	2010	Authors	unpublished	Western Hills of Beijing	369.26	299.23	81.0352	70.0296	18.9648	0.234032
Coniferous	128.1	42.4	3.24624	12.1286	5.96	3.3	-16.5	20.5	750	2200	1200	3.114	38	33	27.2	1.4	7	2012	Authors	unpublished	Changbai mountains	333.4	259.141	77.7268	74.2587	22.2732	0.286557
Broadleaved	100.91	41.8333	0.4	7	8.1	8.3	-5.6	15.7	37	3323	3800	3.112	10	35	30	2.2	7	2018	Authors	unpublished	Ejin oasis	200.84	96.0835	47.8408	104.756	52.1592	1.09027
Broadleaved	101.2	41.8	1.89858	7.70645	7.54764	8.9	-12.5	26.3	43.6	2601.12	3950	3.104	7.307	54	14.65	1.11	7	2017	Authors	unpublished	Ejin Banner	165.61	78.1884	47.2124	87.4216	52.7876	1.11809
Broadleaved	101.2	41.8	1.89858	7.70645	7.54764	8.9	-12.5	26.3	43.6	2601.12	3950	3.088	10.23	53	16.05	1.28	7	2017	Authors	unpublished	Ejin Banner	165.61	78.1884	47.2124	87.4216	52.7876	1.11809
Broadleaved	101.2	41.8	1.89858	7.70645	7.54764	8.9	-12.5	26.3	43.6	2601.12	3950	3.076	4.43	41	13.2	0.94	7	2017	Authors	unpublished	Ejin Banner	165.61	78.1884	47.2124	87.4216	52.7876	1.11809
Coniferous	106.2	27.2	0.69	1.9	4.46	13.8	3.7	21.2	1050	1345	766.1	8.7	54.4872	29.8851	11.288	1.63865	7	2017	Authors	unpublished	Beijing Songshan	369.26	299.23	81.0352	70.0296	18.9648	0.234032
Coniferous	106.2	27.2	0.69	1.9	4.46	13.8	3.7	21.2	1050	1345	766.1	7.9	13	42.3	16.5	0.54	7	2017	Authors	unpublished	Fujian Pingtan Island	369.26	299.23	81.0352	70.0296	18.9648	0.234032
Coniferous	106.3	27.2	0.74	2.25	4.46	13.8	3.6	21.2	1050	1345	766.1	2.23	8.3	39.7	22.1	0.66	7	2017	Authors	unpublished	Fujian Pingtan Island	341.96	277.549	81.1642	64.4108	18.8358	0.23207
Coniferous	106.3	27.2	0.74	2.25	4.46	13.8	3.6	21.2	1050	1345	766.1	2.12	85.123	60.0204	20.1915	2.31779	7	2016	Authors	unpublished	Beijing Songshan	341.96	277.549	81.1642	64.4108	18.8358	0.23207
Coniferous	106.3	27.2	0.74	2.25	4.46	13.8	3.6	21.2	1050	1345	766.1	2.04	62.6667	26.7206	11.748	1.68088	7	2017	Authors	unpublished	Beijing Songshan	341.96	277.549	81.1642	64.4108	18.8358	0.23207
Coniferous	106.3	27.2	0.71	2.1	4.46	13.8	3.7	21.2	1050	1345	766.1	1.83	50.0854	28.7719	12.29	1.65028	7	2017	Authors	unpublished	Beijing Songshan	341.96	277.549	81.1642	64.4108	18.8358	0.23207
Coniferous	106.3	27.2	0.71	2.1	4.46	13.8	3.7	21.2	1050	1345	766.1	1.8	5.46	38.86	20.5	1.9	6	2008	Authors	unpublished	Yichuan	341.96	277.549	81.1642	64.4108	18.8358	0.23207
Coniferous	106.3	27.2	0.71	2.1	4.46	13.8	3.7	21.2	1050	1345	766.1	1.78	34.2092	31.6808	30.282	2.75942	7	2016	Authors	unpublished	Beijing Songshan	341.96	277.549	81.1642	64.4108	18.8358	0.23207
Coniferous	100	27.62	0.9	3.3	5.01	5	-8.5	10.5	628	2200	1347.3	3.8	50.3975	19.0758	7.98301	0.805031	7	2016	Authors	unpublished	Beijing Songshan	353.76	237.836	67.231	115.924	32.769	0.487409
Coniferous	100	27.62	0.9	3.3	5.01	5.2	-8	11.8	632	2340	1347.3	3.6	72.3393	28	11.448	1.84323	7	2017	Authors	unpublished	Beijing Songshan	353.76	237.836	67.231	115.924	32.769	0.487409
Coniferous	100	27.62	0.9	3.3	5.01	5.4	-7	12.4	654	2100	1347.3	2.7	69.1404	28.0788	12.813	1.5876	7	2017	Authors	unpublished	Beijing Songshan	353.76	237.836	67.231	115.924	32.769	0.487409
Coniferous	100	27.62	0.9	3.3	5.01	4.5	-8.8	9.2	615	2323	1347.3	2.7	24.1	27.8	10.2	0.839813	6	2019	Authors	unpublished	Guangxi Ningming County	353.76	237.836	67.231	115.924	32.769	0.487409
Coniferous	119.62	29.12	1.76624	13.4037	4.52779	17	6.5	32.2	1414	1651.35	1587	1.44	25.457	36.9193	14.9049	1.8226	7	2016	Authors	unpublished	Beijing Songshan	395.43	307.18	77.6825	88.25	22.3175	0.287291
Coniferous	119.62	29.12	1.76624	13.4037	4.52779	17	6.5	32.2	1414	1651.35	1587	1.43	34.4874	27.2	15.9188	2.01793	7	2016	Authors	unpublished	Beijing Songshan	395.43	307.18	77.6825	88.25	22.3175	0.287291
Coniferous	101.83	29.6666	2.68	28.47	5.97	8.5	4.1	16.7	1387	2100	1893	4.345	42.7784	32.1635	17.8842	3.07756	7	2016	Authors	unpublished	Beijing Songshan	289.63	167.756	57.9209	121.874	42.0791	0.726491
Coniferous	101.83	29.6666	2.56787	10.9141	6.08758	10	4.1	16.7	1600	2095.64	1893	5.6	20.8	24.1	11.748	1.18	6	2019	Authors	unpublished	Guangxi Ningming County	289.63	167.756	57.9209	121.874	42.0791	0.726491
Coniferous	108.7	30.15	2.12491	11.8275	5.5576	17.7	5.6	24	1287	1945.6	1109.2	34.1	52.2865	22.1045	15.3432	0.97	7	2016	Authors	unpublished	Beijing Songshan	389.24	265.471	68.2023	123.769	31.7977	0.466225
Coniferous	108.7	30.15	2.12491	11.8275	5.5576	17.7	5.6	24	1287	1945.6	1109.2	28.903	70.2222	25.9615	8.626	1.29876	7	2017	Authors	unpublished	Beijing Songshan	389.24	265.471	68.2023	123.769	31.7977	0.466225
Coniferous	108.7	30.15	2.12491	11.8275	5.5576	17.7	5.6	24	1287	1945.6	1109.2	28.31	72.1961	25.5	12.334	1.86422	7	2017	Authors	unpublished	Beijing Songshan	389.24	265.471	68.2023	123.769	31.7977	0.466225
Coniferous	112.48	35.008	1.84648	10.8257	5.81861	14.33	-0.1	27	650	2064.79	891.2	3.588	7.65	37	21	1.7	6	2008	Authors	unpublished	Yichuan	338.09	272.706	80.6606	65.3844	19.3393	0.239762
Coniferous	112.48	35.008	1.84648	10.8257	5.81861	14.33	-0.1	27	650	2064.79	891.2	2.983	62.9474	27.0142	12.843	1.43118	7	2017	Authors	unpublished	Beijing Songshan	338.09	272.706	80.6606	65.3844	19.3393	0.239762
Coniferous	112.48	35.008	1.84648	10.8257	5.81861	14.33	-0.1	27	650	2064.79	891.2	29.83	32.7131	35.4336	8.15809	0.786534	7	2016	Authors	unpublished	Beijing Songshan	338.09	272.706	80.6606	65.3844	19.3393	0.239762
Coniferous	112.48	35.008	1.84648	10.8257	5.81861	14.33	-0.1	27	650	2064.79	891.2	13.28	58.8333	30	14.046	1.69417	7	2017	Authors	unpublished	Beijing Songshan	338.09	272.706	80.6606	65.3844	19.3393	0.239762
Coniferous	112.49	35.012	1.84708	10.8242	5.81833	14.33	-0.1	27	650	2064.8	891.2	6.56	37.1624	38.8206	13.1963	2.16491	7	2016	Authors	unpublished	Beijing Songshan	309.77	249.862	80.6606	59.9075	19.3393	0.239762
Coniferous	112.49	35.012	1.84708	10.8242	5.81833	14.33	-0.1	27	650	2064.8	891.2	4.69	23.9	25.6	18.18	1.4	6	2019	Authors	unpublished	Guangxi Ningming County	309.77	249.862	80.6606	59.9075	19.3393	0.239762
Coniferous	112.49	35.012	1.84708	10.8242	5.81833	14.33	-0.1	27	650	2064.8	891.2	33	54.6958	31.8905	14.4834	1.00056	7	2016	Authors	unpublished	Beijing Songshan	309.77	249.862	80.6606	59.9075	19.3393	0.239762
Coniferous	112.49	35.012	1.84708	10.8242	5.81833	14.33	-0.1	27	650	2064.8	891.2	29.83	25.8069	43.2579	16.55	0.737445	7	2016	Authors	unpublished	Beijing Songshan	309.77	249.862	80.6606	59.9075	19.3393	0.239762
Coniferous	108.66	35.3	2.52194	9.52683	6.21872	7	-7	16.8	600	2203.22	1256	7	31.4478	39.4047	18.0423	1.75066	7	2016	Authors	unpublished	Beijing Songshan	260.54	96.128	36.8957	164.412	63.1043	1.71034
Coniferous	108.66	35.3	2.52979	9.51582	6.21941	7	-7	16.8	600	2203.77	1256	7	14.2705	36	17.0512	1.9543	7	2016	Authors	unpublished	Beijing Songshan	260.54	96.128	36.8957	164.412	63.1043	1.71034
Coniferous	108.66	35.3	2.40204	9.69482	6.20823	7	-7	16.8	600	2194.82	1256	7	14.3216	34	17.7014	1.05536	7	2016	Authors	unpublished	Beijing Songshan	260.54	96.128	36.8957	164.412	63.1043	1.71034
Coniferous	108.66	35.3	2.38776	9.71482	6.20698	7	-7	16.8	600	2193.82	1256	2	27.0658	44.4797	14.5345	1.42267	7	2016	Authors	unpublished	Beijing Songshan	260.54	96.128	36.8957	164.412	63.1043	1.71034
Coniferous	108.66	35.3	2.53692	9.50582	6.22003	7	-7	16.8	600	2204.27	1256	2	36.3646	31.8831	16.3358	2.90619	7	2016	Authors	unpublished	Beijing Songshan	260.54	96.128	36.8957	164.412	63.1043	1.71034
Coniferous	110.1	35.65	2.20946	9.94191	6.1185	9.8	-4.5	19.8	574.4	2167.44	1478	3.011	55.7541	28.2407	13.902	2.04747	7	2017	Authors	unpublished	Beijing Songshan	335.37	134.911	40.2275	200.459	59.7725	1.48586
Coniferous	110.1	35.65	2.20946	9.94191	6.1185	9.8	-4.5	19.8	574.4	2167.44	1478	3.8	67.9	28.0899	10.465	1.40297	7	2017	Authors	unpublished	Beijing Songshan	335.37	134.911	40.2275	200.459	59.7725	1.48586
Coniferous	103.4	36.03	2.26	9.29761	6.70503	10.3	-2.3	23.2	327	2324.89	2589	23.56	72.0851	28.3133	12.664	1.51639	7	2017	Authors	unpublished	Beijing Songshan	289.06	128.753	44.542	160.307	55.458	1.24507
Coniferous	103.4	36.03	2.26	9.29761	6.70503	10.3	-2.3	23.2	327	2324.89	2589	6.5	67.8156	18.9158	10.3558	2.04919	7	2016	Authors	unpublished	Beijing Songshan	289.06	128.753	44.542	160.307	55.458	1.24507
Coniferous	103.4	36.03	2.26	9.29761	6.70503	10.3	-2.3	23.2	327	2324.89	2589	5.9	84.5897	20.2073	11.79	1.71669	7	2017	Authors	unpublished	Beijing Songshan	289.06	128.753	44.542	160.307	55.458	1.24507
Coniferous	103.4	36.03	2.26	9.29761	6.70503	10.3	-2.3	23.2	327	2324.89	2589	5.9	48.5481	31.9149	18.7402	1.88282	7	2016	Authors	unpublished	Beijing Songshan	289.06	128.753	44.542	160.307	55.458	1.24507
Coniferous	103.4	36.03	2.26	9.29761	6.70503	10.3	-2.3	23.2	327	2324.89	2589	5.7	41.2963	27.7404	15.5805	0.988996	7	2016	Authors	unpublished	Beijing Songshan	289.06	128.753	44.542	160.307	55.458	1.24507
Coniferous	103.4	36.03	2.26	9.29761	6.70503	10.3	-2.3	23.2	327	2324.89	2589	4.8	42.2846	48.2111	15.5084	2.26686	7	2016	Authors	unpublished	Beijing Songshan	289.06	128.753	44.542	160.307	55.458	1.24507
Coniferous	103.4	36.03	2.26	9.29761	6.70503	10.3	-2.3	23.2	327	2324.89	2589	4.5	39.3423	32.2593	14.8911	1.37512	7	2016	Authors	unpublished	Beijing Songshan	289.06	128.753	44.542	160.307	55.458	1.24507
Coniferous	103.4	36.03	2.26	9.29761	6.70503	10.3	-2.3	23.2	327	2324.89	2589	3.8	58.7273	23.8095	12.781	1.49944	7	2017	Authors	unpublished	Beijing Songshan	289.06	128.753	44.542	160.307	55.458	1.24507
Coniferous	103.4	36.03	2.26	9.29761	6.70503	10.3	-2.3	23.2	327	2324.89	2589	3.7	72.9773	22.6804	15.588	1.69078	7	2017	Authors	unpublished	Beijing Songshan	289.06	128.753	44.542	160.307	55.458	1.24507
Coniferous	103.4	36.03	2.26	9.29761	6.70503	10.3	-2.3	23.2	327	2324.89	2589	3.6	31.8272	36.6715	14.0365	2.55066	7	2016	Authors	unpublished	Beijing Songshan	289.06	128.753	44.542	160.307	55.458	1.24507
Coniferous	103.4	36.03	2.26	9.29761	6.70503	10.3	-2.3	23.2	327	2324.89	2589	2.4	56.4362	62.8726	18.1658	1.83144	7	2016	Authors	unpublished	Beijing Songshan	289.06	128.753	44.542	160.307	55.458	1.24507
Coniferous	103.4	36.03	2.26	9.29761	6.70503	10.3	-2.3	23.2	327	2324.89	2589	1.94	58.5213	27.4	17.829	1.83727	7	2016	Authors	unpublished	Beijing Songshan	289.06	128.753	44.542	160.307	55.458	1.24507
Coniferous	112.15	36.55	2.73513	9.03714	6.10937	6.2	-2.8	11.8	662	2202.36	1478.4	11.4	77.0244	25.3086	15.136	1.65739	7	2017	Authors	unpublished	Beijing Songshan	353.18	238.464	67.5192	114.716	32.4808	0.48106
Coniferous	112.15	36.55	2.73513	9.03714	6.10937	6.2	-2.8	11.8	662	2202.36	1945.6	3.211	34.8943	33.8224	17.5548	1.62543	7	2016	Authors	unpublished	Beijing Songshan	353.18	238.464	67.5192	114.716	32.4808	0.48106
Coniferous	112.15	36.55	2.73513	9.03714	6.10937	6.2	-2.8	11.8	662	2202.36	1945.6	26.2	47.4381	26.7237	15.3607	1.47732	7	2016	Authors	unpublished	Beijing Songshan	353.18	238.464	67.5192	114.716	32.4808	0.48106
Coniferous	112.15	36.55	2.73513	9.03714	6.10937	6.2	-2.8	11.8	662	2202.36	1770	23.7	41.749	29.6634	16.9765	0.945118	7	2016	Authors	unpublished	Beijing Songshan	353.18	238.464	67.5192	114.716	32.4808	0.48106
Coniferous	112.15	36.55	2.73513	9.03714	6.10937	6.2	-2.8	11.8	662	2202.36	1256	23.7	32.3834	39.6793	3.76744	0.911529	7	2016	Authors	unpublished	Beijing Songshan	353.18	238.464	67.5192	114.716	32.4808	0.48106
Coniferous	112.15	36.55	2.73513	9.03714	6.10937	6.2	-2.8	11.8	662	2202.36	1369	13.2	63.551	27.0718	9.575	1.47098	7	2017	Authors	unpublished	Beijing Songshan	353.18	238.464	67.5192	114.716	32.4808	0.48106
Coniferous	112.15	36.55	2.73513	9.03714	6.10937	6.2	-2.8	11.8	662	2202.36	1369	11.4	36.6981	33.4649	8.76403	1.60328	7	2016	Authors	unpublished	Beijing Songshan	353.18	238.464	67.5192	114.716	32.4808	0.48106
Coniferous	112.15	36.55	2.73513	9.03714	6.10937	6.2	-2.8	11.8	662	2202.36	1770	10.8	39.2911	26.7253	15.0517	1.94475	7	2016	Authors	unpublished	Beijing Songshan	353.18	238.464	67.5192	114.716	32.4808	0.48106
Coniferous	112.15	36.55	2.73513	9.03714	6.10937	6.2	-2.8	11.8	662	2202.36	1874	9.5	31.8351	44.783	11.9398	1.74185	7	2016	Authors	unpublished	Beijing Songshan	353.18	238.464	67.5192	114.716	32.4808	0.48106
Coniferous	111.4	37.8	3.04853	8.12545	6.34806	4.3	-10.2	17.5	822.6	2295.23	1268	12.3	20.3844	24	13.3395	1.1	7	2016	Authors	unpublished	Beijing Songshan	268.23	193.078	71.9822	75.1521	28.0178	0.389232
Coniferous	111.4	37.8	3.00571	8.18545	6.34431	4.3	-10.2	17.5	822.6	2292.23	1268	11.2	53.7128	28.0452	15.0992	1.73235	7	2016	Authors	unpublished	Beijing Songshan	268.23	193.078	71.9822	75.1521	28.0178	0.389232
Coniferous	111.4	37.8	2.96289	8.24545	6.34057	4.3	-10.2	17.5	822.6	2289.23	1268	9.4	28.2918	40.6227	26.1105	2.50336	7	2016	Authors	unpublished	Beijing Songshan	268.23	193.078	71.9822	75.1521	28.0178	0.389232
Coniferous	111.4	37.8	2.92006	8.30545	6.33682	4.3	-10.2	17.5	822.6	2286.23	1268	7.8	20.2185	55.5538	17.5548	1.66025	7	2016	Authors	unpublished	Beijing Songshan	268.23	193.078	71.9822	75.1521	28.0178	0.389232
Coniferous	111.4	37.8	2.87724	8.36545	6.33307	4.3	-10.2	17.5	822.6	2283.23	1268	6.3	53.9184	22.9362	12.5374	1.85914	7	2016	Authors	unpublished	Beijing Songshan	268.23	193.078	71.9822	75.1521	28.0178	0.389232
Coniferous	115.58	39.945	2.28253	8.75089	6.20612	2.7	-8.6	23.7	500	2251.45	1760	3.125	24.2926	31	13.5898	1.73491	7	2016	Authors	unpublished	Beijing Songshan	264	196.793	74.5429	67.2068	25.4571	0.34151
Coniferous	115.58	39.945	2.28253	8.75089	6.20612	2.7	-8.6	23.7	500	2251.45	1760	21	28.3302	43.9225	14.8624	2.3843	7	2016	Authors	unpublished	Beijing Songshan	264	196.793	74.5429	67.2068	25.4571	0.34151
Coniferous	115.8	40.5	3.419	8.44286	6.05	9.2	-8.6	22.9	493	2300	1770	3.277	19.9404	54.7896	15.1105	0.964206	7	2016	Authors	unpublished	Beijing Songshan	323.06	214.58	66.4211	108.48	33.5789	0.505545
Coniferous	115.8	40.5	4.053	6.04286	6	9.2	-8.6	22.9	493	2300	1770	3.239	40.4301	21.1171	6.9014	0.665935	7	2016	Authors	unpublished	Beijing Songshan	323.06	214.58	66.4211	108.48	33.5789	0.505545
Coniferous	115.8	40.5	6.165	8.98571	6.03	9.2	-8.6	22.9	493	2300	1770	3.23	30.1001	32.0706	14.3524	1.49453	7	2016	Authors	unpublished	Beijing Songshan	323.06	214.58	66.4211	108.48	33.5789	0.505545
Coniferous	115.8	40.5	4.055	7.27143	5.75	9.2	-8.6	22.9	493	2300	1770	3.23	26.7171	40.4608	14.6326	2.15052	7	2016	Authors	unpublished	Beijing Songshan	323.06	214.58	66.4211	108.48	33.5789	0.505545
Coniferous	115.8	40.5	2.796	6.55714	5.83	9.2	-8.6	22.9	493	2300	1770	3.205	23.9968	45.801	15.9999	1.72614	7	2016	Authors	unpublished	Beijing Songshan	323.06	214.58	66.4211	108.48	33.5789	0.505545
Coniferous	115.8	40.5	4.717	13.5	5.6	9.2	-8.6	22.9	493	2300	1770	3.067	28.1704	38.1418	12.9574	1.38494	7	2016	Authors	unpublished	Beijing Songshan	323.06	214.58	66.4211	108.48	33.5789	0.505545
Coniferous	115.8	40.5	3.761	9.5	5.64	9.2	-8.6	22.9	493	2300	1770	3.041	26.4368	46.91	13.7833	0.87	7	2016	Authors	unpublished	Beijing Songshan	323.06	214.58	66.4211	108.48	33.5789	0.505545
Coniferous	115.8	40.5	3.854	8.02857	5.75	9.2	-8.6	22.9	493	2300	1770	3.039	25.915	35.5645	14.8895	1.21828	7	2016	Authors	unpublished	Beijing Songshan	323.06	214.58	66.4211	108.48	33.5789	0.505545
Coniferous	115.8	40.5	3.943	8.84286	5.83	9.2	-8.6	22.9	493	2300	1770	3.02	18.5625	27.6	15.0494	1.81543	7	2016	Authors	unpublished	Beijing Songshan	323.06	214.58	66.4211	108.48	33.5789	0.505545
Coniferous	115.8	40.5	3.149	6.07143	5.87	9.2	-8.6	22.9	493	2300	1770	3.003	26.5302	40.1778	13.5907	2.03815	7	2016	Authors	unpublished	Beijing Songshan	323.06	214.58	66.4211	108.48	33.5789	0.505545
Coniferous	115.8	40.5	4.329	8.88571	7.57	9.2	-8.6	22.9	493	2300	1770	3.002	17.4354	51.3717	11.5774	2.73089	7	2016	Authors	unpublished	Beijing Songshan	323.06	214.58	66.4211	108.48	33.5789	0.505545
Coniferous	115.8	40.5	3.731	7.41429	5.72	9.2	-8.6	22.9	493	2300	1770	2.99	53.0357	32.9412	14.326	1.82816	7	2017	Authors	unpublished	Beijing Songshan	323.06	214.58	66.4211	108.48	33.5789	0.505545
Coniferous	115.8	40.5	2.831	8.15714	6.28	9.2	-8.6	22.9	493	2300	1770	2.988	17.189	26.8	15.9712	1.90164	7	2016	Authors	unpublished	Beijing Songshan	323.06	214.58	66.4211	108.48	33.5789	0.505545
Coniferous	115.8	40.5	3.761	9.5	5.64	9.2	-8.6	22.9	493	2300	1770	2.983	29.1759	42.2326	23.1678	1.2192	7	2016	Authors	unpublished	Beijing Songshan	323.06	214.58	66.4211	108.48	33.5789	0.505545
Coniferous	115.8	40.5	2.796	6.55714	5.83	9.2	-8.6	22.9	493	2300	1770	2.971	34.218	61.9584	15.4813	1.62731	7	2016	Authors	unpublished	Beijing Songshan	323.06	214.58	66.4211	108.48	33.5789	0.505545
Coniferous	115.8	40.5	3.149	6.07143	5.87	9.2	-8.6	22.9	493	2300	1770	4.3	36.3763	32.1038	17.551	1.07675	7	2016	Authors	unpublished	Beijing Songshan	323.06	214.58	66.4211	108.48	33.5789	0.505545
Coniferous	115.8	40.5	3.933	8.14286	7.31	9.2	-8.6	22.9	493	2300	1770	3.52	22.8457	43.604	20.4398	1.6144	7	2016	Authors	unpublished	Beijing Songshan	323.06	214.58	66.4211	108.48	33.5789	0.505545
Coniferous	115.8	40.5	3.213	8.15714	5.66	9.2	-8.6	22.9	493	2300	1770	3.91	16.743	65.0386	14.6724	1.4255	7	2016	Authors	unpublished	Beijing Songshan	323.06	214.58	66.4211	108.48	33.5789	0.505545
Coniferous	115.8	40.5	3.198	6.75714	7.25	9.2	-8.6	22.9	493	2300	1770	3.54	28.0334	44.0571	15.399	2.38121	7	2016	Authors	unpublished	Beijing Songshan	323.06	214.58	66.4211	108.48	33.5789	0.505545
Coniferous	115.8	40.5	3.38	9.9	6.26	9.2	-8.6	22.9	493	2300	1770	3.45	56.9739	23.3178	15.314	1.48634	7	2016	Authors	unpublished	Beijing Songshan	323.06	214.58	66.4211	108.48	33.5789	0.505545
Broadleaved	115.46	40.02	2.51459	8.39241	6.2451	7.5	-8.8	24.7	550	2273.5	1760	17.87	19.93	30.3	31.53	1.604	7	2011	Authors	unpublished	Dongling mountain	271.82	204.633	75.2827	67.1866	24.7173	0.328327
Broadleaved	115.46	40.02	2.51459	8.39241	6.2451	7.5	-8.8	24.7	550	2273.5	1760	30.41	18.3	36.6	25.62	1.525	7	2011	Authors	unpublished	Dongling mountain	271.82	204.633	75.2827	67.1866	24.7173	0.328327
Broadleaved	115.46	40.02	2.51459	8.39241	6.2451	7.5	-8.8	24.7	550	2273.5	1760	30.41	21.87	35.4	26.56	1.463	7	2011	Authors	unpublished	Dongling mountain	271.82	204.633	75.2827	67.1866	24.7173	0.328327
Broadleaved	115.58	39.945	2.28253	8.75089	6.20612	2.7	-8.6	23.7	500	2251.45	1760	21	12.4	32.2	13	1.05	7	2010	Authors	unpublished	Western Hills of Beijing	264	196.793	74.5429	67.2068	25.4571	0.34151
Broadleaved	115.58	39.945	2.28253	8.75089	6.20612	2.7	-8.6	23.7	500	2251.45	1760	30	13.2	35.3	11	0.75	7	2010	Authors	unpublished	Western Hills of Beijing	264	196.793	74.5429	67.2068	25.4571	0.34151
Broadleaved	115.58	39.945	2.28253	8.75089	6.20612	2.7	-8.6	23.7	500	2251.45	1760	17	15.4	32.1	11	1.2	7	2010	Authors	unpublished	Western Hills of Beijing	264	196.793	74.5429	67.2068	25.4571	0.34151
Broadleaved	115.58	39.945	2.28253	8.75089	6.20612	2.7	-8.6	23.7	500	2251.45	1760	42	18.7	24.5	12	0.83	7	2010	Authors	unpublished	Western Hills of Beijing	264	196.793	74.5429	67.2068	25.4571	0.34151
Broadleaved	115.58	39.945	2.28253	8.75089	6.20612	2.7	-8.6	23.7	500	2251.45	1760	23	8.7	33.1	12	1	7	2010	Authors	unpublished	Western Hills of Beijing	264	196.793	74.5429	67.2068	25.4571	0.34151
Broadleaved	115.58	39.945	2.28253	8.75089	6.20612	2.7	-8.6	23.7	500	2251.45	1760	44	24.2	35.2	9.3	1.3	7	2010	Authors	unpublished	Western Hills of Beijing	264	196.793	74.5429	67.2068	25.4571	0.34151
Broadleaved	115.58	39.945	2.28253	8.75089	6.20612	2.7	-8.6	23.7	500	2251.45	1760	21	14.3	26.2	10	1.05	7	2010	Authors	unpublished	Western Hills of Beijing	264	196.793	74.5429	67.2068	25.4571	0.34151
Coniferous	115.8	40.5	3.731	7.41429	5.72	9.2	-8.6	22.9	493	2300	1770	3.5	25.258	45.4877	7.72541	2.3	7	2016	Authors	unpublished	Beijing Songshan	323.06	214.58	66.4211	108.48	33.5789	0.505545
Coniferous	115.8	40.5	3.933	8.14286	7.31	9.2	-8.6	22.9	493	2300	1770	3.6	26.6028	38.6399	6.18082	0.699963	7	2016	Authors	unpublished	Beijing Songshan	323.06	214.58	66.4211	108.48	33.5789	0.505545
Coniferous	115.8	40.5	3.198	6.75714	7.25	9.2	-8.6	22.9	493	2300	1770	3.5	29.9788	38.1202	14.3799	1.4063	7	2016	Authors	unpublished	Beijing Songshan	323.06	214.58	66.4211	108.48	33.5789	0.505545
Coniferous	115.8	40.5	1.314	5.37143	6.47	9.2	-8.6	22.9	493	2300	1770	34.2	83.2647	22.8188	12.974	1.92966	7	2017	Authors	unpublished	Beijing Songshan	323.06	214.58	66.4211	108.48	33.5789	0.505545
Coniferous	115.8	40.5	6.48	11.0714	6.83	9.2	-8.6	22.9	493	2300	1770	34.13	29.4456	48.6267	14.9536	0.87387	7	2016	Authors	unpublished	Beijing Songshan	323.06	214.58	66.4211	108.48	33.5789	0.505545
Coniferous	115.8	40.5	3.943	8.84286	5.83	9.2	-8.6	22.9	493	2300	1770	34.11	37.6415	32.6728	17.6109	1.34193	7	2016	Authors	unpublished	Beijing Songshan	323.06	214.58	66.4211	108.48	33.5789	0.505545
Coniferous	115.8	40.5	6.48	11.0714	6.83	9.2	-8.6	22.9	493	2300	1770	34.01	32.0598	36.2083	17.0781	0.899634	7	2016	Authors	unpublished	Beijing Songshan	323.06	214.58	66.4211	108.48	33.5789	0.505545
Coniferous	115.8	40.5	1.314	5.37143	6.47	9.2	-8.6	22.9	493	2300	1770	33.95	25.9795	42.9185	13.6132	2.09513	7	2016	Authors	unpublished	Beijing Songshan	323.06	214.58	66.4211	108.48	33.5789	0.505545
Coniferous	115.8	40.5	3.731	7.41429	5.72	9.2	-8.6	22.9	493	2300	1770	33.88	83.9394	25.9843	11.343	1.40577	7	2017	Authors	unpublished	Beijing Songshan	323.06	214.58	66.4211	108.48	33.5789	0.505545
Coniferous	115.8	40.5	4.055	7.27143	5.75	9.2	-8.6	22.9	493	2300	1770	33.84	27.6393	37.4532	7.14706	0.923886	7	2016	Authors	unpublished	Beijing Songshan	323.06	214.58	66.4211	108.48	33.5789	0.505545
Coniferous	115.8	40.5	2.603	5.98571	6.08	9.2	-8.6	22.9	493	2300	1770	32.99	25.9269	35.1042	5.86606	0.799119	7	2016	Authors	unpublished	Beijing Songshan	323.06	214.58	66.4211	108.48	33.5789	0.505545
Coniferous	115.8	40.5	6.165	8.98571	6.03	9.2	-8.6	22.9	493	2300	1770	32.77	27.4975	34.5148	17.7298	1.04669	7	2016	Authors	unpublished	Beijing Songshan	323.06	214.58	66.4211	108.48	33.5789	0.505545
Coniferous	115.8	40.5	3.991	8.61429	5.68	9.2	-8.6	22.9	493	2300	1770	32.5	25.8894	45.6982	19.6784	0.758098	7	2016	Authors	unpublished	Beijing Songshan	323.06	214.58	66.4211	108.48	33.5789	0.505545
Coniferous	115.8	40.5	3.761	9.5	5.64	9.2	-8.6	22.9	493	2300	1770	32.39	29.3404	39.6497	9.20657	0.406917	7	2016	Authors	unpublished	Beijing Songshan	323.06	214.58	66.4211	108.48	33.5789	0.505545
Coniferous	115.8	40.5	3.761	9.5	5.64	9.2	-8.6	22.9	493	2300	1770	32.3	21.8636	63.2397	13.8904	1.99337	7	2016	Authors	unpublished	Beijing Songshan	323.06	214.58	66.4211	108.48	33.5789	0.505545
Broadleaved	108.66	35.3	2.4784	9.58783	6.21491	7	-7	16.8	600	2200.17	1256	33	13	55	14.5	1.3	8	2010	Authors	unpublished	ziwu mountain	260.54	96.128	36.8957	164.412	63.1043	1.71034
Broadleaved	108.66	35.3	2.45199	9.62482	6.2126	7	-7	16.8	600	2198.32	1256	33	13	55	14.5	1.3	8	2010	Authors	unpublished	ziwu mountain	260.54	96.128	36.8957	164.412	63.1043	1.71034
Broadleaved	108.66	35.3	2.48768	9.57483	6.21572	7	-7	16.8	600	2200.82	1256	33	13	55	14.5	1.3	8	2010	Authors	unpublished	ziwu mountain	260.54	96.128	36.8957	164.412	63.1043	1.71034
Coniferous	115.8	40.5	3.629	6.07143	6.14	9.2	-8.6	22.9	493	2300	1770	32.3	31.7949	34.0611	18.231	0.845221	7	2016	Authors	unpublished	Beijing Songshan	323.06	214.58	66.4211	108.48	33.5789	0.505545
Coniferous	115.8	40.5	1.314	5.37143	6.47	9.2	-8.6	22.9	493	2300	1770	32.11	30.2892	42.9938	14.5747	3.11399	7	2016	Authors	unpublished	Beijing Songshan	323.06	214.58	66.4211	108.48	33.5789	0.505545
Coniferous	115.8	40.5	3.933	8.14286	7.31	9.2	-8.6	22.9	493	2300	1770	32.05	28.9468	39.1178	14.9428	0.839813	7	2016	Authors	unpublished	Beijing Songshan	323.06	214.58	66.4211	108.48	33.5789	0.505545
Coniferous	115.8	40.5	5.514	11.3429	5.32	9.2	-8.6	22.9	493	2300	1770	31.83	25.4972	43.5458	13.4286	1.65801	7	2016	Authors	unpublished	Beijing Songshan	323.06	214.58	66.4211	108.48	33.5789	0.505545
Coniferous	115.8	40.5	3.532	8.02857	5.94	9.2	-8.6	22.9	493	2300	1770	31.66	26.6962	41.9554	7.00118	1.9285	7	2016	Authors	unpublished	Beijing Songshan	323.06	214.58	66.4211	108.48	33.5789	0.505545
Coniferous	115.8	40.5	3.198	6.75714	7.25	9.2	-8.6	22.9	493	2300	1770	31.58	64.5714	28.7671	13.831	2.12793	7	2017	Authors	unpublished	Beijing Songshan	323.06	214.58	66.4211	108.48	33.5789	0.505545
Broadleaved	108.66	35.3	2.46484	9.60683	6.21372	7	-7	16.8	600	2199.22	1256	24	18	40	17.3	1.25	8	2010	Literatures	Li et al., 2010	ziwu mountain	260.54	96.128	36.8957	164.412	63.1043	1.71034
Broadleaved	108.66	35.3	2.31496	9.81682	6.20061	7	-7	16.8	600	2188.72	1256	24	18	40	17.3	1.25	8	2010	Literatures	Li et al., 2010	ziwu mountain	260.54	96.128	36.8957	164.412	63.1043	1.71034
Broadleaved	108.66	35.3	2.45199	9.62482	6.2126	7	-7	16.8	600	2198.32	1256	24	18	40	17.3	1.25	8	2010	Literatures	Li et al., 2010	ziwu mountain	260.54	96.128	36.8957	164.412	63.1043	1.71034
Broadleaved	108.66	35.3	2.51837	9.53182	6.21841	7	-7	16.8	600	2202.97	1256	4.8	26	33	25.2	2.2	8	2010	Literatures	Li et al., 2010	ziwu mountain	260.54	96.128	36.8957	164.412	63.1043	1.71034
Broadleaved	108.66	35.3	2.22718	9.93983	6.19293	7	-7	16.8	600	2182.57	1256	4.8	26	33	25.2	2.2	8	2010	Literatures	Li et al., 2010	ziwu mountain	260.54	96.128	36.8957	164.412	63.1043	1.71034
Broadleaved	108.66	35.3	2.23075	9.93483	6.19324	7	-7	16.8	600	2182.82	1256	4.8	26	33	25.2	2.2	8	2010	Literatures	Li et al., 2010	ziwu mountain	260.54	96.128	36.8957	164.412	63.1043	1.71034
Coniferous	115.8	40.5	4.472	10.6429	5.9	9.2	-8.6	22.9	493	2300	1770	31.37	29.7692	31.8962	15.6846	0.932627	7	2016	Literatures	Zhang et al., 2016	Beijing Songshan	323.06	214.58	66.4211	108.48	33.5789	0.505545
Coniferous	115.8	40.5	3.532	8.02857	5.94	9.2	-8.6	22.9	493	2300	1770	31.3	24.7344	43.2304	14.0023	1.95528	7	2016	Literatures	O et al., 2016	Beijing Songshan	323.06	214.58	66.4211	108.48	33.5789	0.505545
Coniferous	115.8	40.5	3.299	9.31429	5.9	9.2	-8.6	22.9	493	2300	1770	31.27	42.7583	45.1145	18.4997	1.10484	7	2016	Literatures	O et al., 2016	Beijing Songshan	323.06	214.58	66.4211	108.48	33.5789	0.505545
Coniferous	115.8	40.5	3.198	6.75714	7.25	9.2	-8.6	22.9	493	2300	1770	31.25	29.7572	30.6599	7.38852	2.72428	7	2016	Literatures	Zhang et al., 2016	Beijing Songshan	323.06	214.58	66.4211	108.48	33.5789	0.505545
Coniferous	115.8	40.5	4.053	6.04286	6	9.2	-8.6	22.9	493	2300	1770	31.14	21.1129	51.245	14.7362	3.02732	7	2016	Literatures	Zhang et al., 2016	Beijing Songshan	323.06	214.58	66.4211	108.48	33.5789	0.505545
Coniferous	115.8	40.5	2.831	8.15714	6.28	9.2	-8.6	22.9	493	2300	1770	31.12	19.8526	33.2772	13.8632	1.28162	7	2016	Literatures	O et al., 2016	Beijing Songshan	323.06	214.58	66.4211	108.48	33.5789	0.505545
Coniferous	115.8	40.5	5.514	11.3429	5.32	9.2	-8.6	22.9	493	2300	1770	31.04	30.8976	44.0446	14.4875	1.60325	7	2016	Literatures	O et al., 2016	Beijing Songshan	323.06	214.58	66.4211	108.48	33.5789	0.505545
Coniferous	115.8	40.5	3.213	8.15714	5.66	9.2	-8.6	22.9	493	2300	1770	30.88	43.3981	35.4765	14.5434	1.11161	7	2016	Literatures	Zhang et al., 2016	Beijing Songshan	323.06	214.58	66.4211	108.48	33.5789	0.505545
Broadleaved	104.85	32.3	2.16389	10.7901	6.12924	11.298	4.1	21.3	952	2122.66	1485.12	33	16.3	46.8	23.88	1.86	8	2013	Literatures	Li et al., 2013	Gansu Motianlun	270.18	192.736	71.336	77.4443	28.664	0.401816
Broadleaved	104.85	32.3	2.65992	10.0951	6.17264	7.128	-8.5	20.7	900	2157.41	1404	26.2	22	24	23	2	8	2013	Literatures	Li et al., 2013	Gansu Motianlun	270.18	192.736	71.336	77.4443	28.664	0.401816
Broadleaved	104.85	32.3	2.74485	9.97607	6.18007	6.414	-0.1	17.5	870	2163.36	1357.2	25.5384	19	36	24	1.38	8	2013	Literatures	He et al., 2013	Gansu Motianlun	270.18	192.736	71.336	77.4443	28.664	0.401816
Broadleaved	104.85	32.3	2.80908	9.88607	6.18569	5.874	-0.1	16.8	867	2167.86	1352.52	0.128	21	36.5	27	1.36	8	2013	Literatures	Li et al., 2013	Gansu Motianlun	270.18	192.736	71.336	77.4443	28.664	0.401816
Broadleaved	104.85	32.3	2.8933	9.76807	6.19306	5.166	-0.1	11.8	865	2173.76	1349.4	29.54	16.5	38	25	1.58	8	2013	Literatures	He et al., 2013	Gansu Motianlun	270.18	192.736	71.336	77.4443	28.664	0.401816
Broadleaved	104.85	32.3	2.94825	9.69107	6.19787	4.704	-2.8	17.5	860	2177.61	1341.6	48.4254	14.5	40	22	1.72	8	2013	Literatures	He et al., 2013	Gansu Motianlun	270.18	192.736	71.336	77.4443	28.664	0.401816
Broadleaved	104.85	32.3	3.01677	9.59507	6.20387	4.128	-8	16.8	859	2182.41	1340.04	26.81	20.8	40.5	27.5	1.76	8	2013	Literatures	He et al., 2013	Gansu Motianlun	270.18	192.736	71.336	77.4443	28.664	0.401816
Broadleaved	104.85	32.3	3.08171	9.50408	6.20955	3.582	-7.8	21.7	855	2186.96	1333.8	59.4	17.9	41	21.8	1.52	8	2013	Literatures	Li et al., 2013	Gansu Motianlun	270.18	192.736	71.336	77.4443	28.664	0.401816
Broadleaved	104.85	32.3	3.15736	9.39808	6.21617	2.946	-8	20.7	850	2192.26	1326	130	17.5	42.3	25.2	1.55	8	2013	Literatures	Li et al., 2013	Gansu Motianlun	270.18	192.736	71.336	77.4443	28.664	0.401816
Broadleaved	104.85	32.3	3.22588	9.30208	6.22216	2.37	-8.5	20.7	849	2197.06	1324.44	81.73	16	43.6	27.3	1.82	8	2013	Literatures	Li et al., 2013	Gansu Motianlun	270.18	192.736	71.336	77.4443	28.664	0.401816
Broadleaved	104.85	32.3	3.28869	9.21407	6.22766	1.842	-2.8	13.5	845	2201.46	1318.2	0.159	15.8	44.1	19	1.21	8	2013	Literatures	Li et al., 2013	Gansu Motianlun	270.18	192.736	71.336	77.4443	28.664	0.401816
Broadleaved	104.85	32.3	3.36648	9.10507	6.23447	1.188	-2.8	16.7	843	2206.91	1315.08	0.166	14	46.5	23	1.28	8	2013	Literatures	Li et al., 2013	Gansu Motianlun	270.18	192.736	71.336	77.4443	28.664	0.401816
Broadleaved	104.85	32.3	3.44284	8.99808	6.24115	0.546	-2.8	14.3	842	2212.26	1313.52	0.817	13	47.9	24	1.5	8	2013	Literatures	Li et al., 2013	Gansu Motianlun	270.18	192.736	71.336	77.4443	28.664	0.401816
Broadleaved	104.85	32.3	3.52849	8.87808	6.24864	-0.174	-7.8	16.8	840	2218.26	1310.4	30.46	5	52	17.3	1.3	8	2013	Literatures	Li et al., 2013	Gansu Motianlun	270.18	192.736	71.336	77.4443	28.664	0.401816
Broadleaved	110.5	31.6	1.95133	11.6999	5.57384	10.6	4.1	16.7	1722	1961.1	567	39.17	10.8	45	14.2	1.1	7	2010	Literatures	Luo et al., 2010	Shennongjia	319.83	262.12	81.9561	57.7099	18.0439	0.220166
Broadleaved	110.5	31.6	2.58652	10.8099	5.62942	9.4	4.8	16.8	1500	2005.6	1874	65.6	16.6	33	11.3	0.75	7	2010	Literatures	Luo et al., 2010	Shennongjia	319.83	262.12	81.9561	57.7099	18.0439	0.220166
Broadleaved	110.5	31.6	2.80063	10.5099	5.64815	8.9	-5.6	19.8	1400	2020.6	560	43.12	20	32	13.9	1.76	7	2010	Literatures	Luo et al., 2010	Shennongjia	319.83	262.12	81.9561	57.7099	18.0439	0.220166
Broadleaved	110.5	31.6	3.22885	9.9099	5.68562	8.6	-0.1	20.7	1306	2050.6	1893	55.95	6.36	40	10.1	1.7	7	2010	Literatures	Luo et al., 2010	Shennongjia	319.83	262.12	81.9561	57.7099	18.0439	0.220166
Coniferous	115.8	40.5	3.991	8.61429	5.68	9.2	-8.6	22.9	493	2300	1770	30.76	72.2703	23.5669	12.654	1.73818	7	2017	Literatures	O et al., 2017	Beijing Songshan	323.06	214.58	66.4211	108.48	33.5789	0.505545
Coniferous	115.8	40.5	3.991	8.61429	5.68	9.2	-8.6	22.9	493	2300	1770	30.67	57.9783	26.2857	11.831	1.6016	7	2017	Literatures	O et al., 2017	Beijing Songshan	323.06	214.58	66.4211	108.48	33.5789	0.505545
Coniferous	115.8	40.5	2.908	6.6	5.93	9.2	-8.6	22.9	493	2300	1770	30.64	47.234	20.0927	6.40248	0.843172	7	2016	Literatures	O et al., 2016	Beijing Songshan	323.06	214.58	66.4211	108.48	33.5789	0.505545
Broadleaved	109.2	30.1	0.548	3.9	4.48	17.7	5.6	24	1287	1300	1109.2	50	18.9	45	18.9	0.76	7	2013	Authors	unpublished	Xingdou Mountain	374.67	311.013	83.0097	63.6575	16.9903	0.204678
Broadleaved	109.2	30.1	0.548	3.9	4.48	17.7	5.6	24	1287	1300	1109.2	47	23.4	42	22.1	0.65	7	2013	Authors	unpublished	Xingdou Mountain	374.67	311.013	83.0097	63.6575	16.9903	0.204678
Broadleaved	109.2	30.1	0.548	3.9	4.48	17.7	5.6	24	1287	1300	1109.2	70	30.7	19	15.4	0.48	7	2013	Authors	unpublished	Xingdou Mountain	374.67	311.013	83.0097	63.6575	16.9903	0.204678
Broadleaved	109.2	30.1	0.548	3.9	4.48	17.7	5.6	24	1287	1300	1109.2	42	14.7	44	26.7	0.84	7	2013	Authors	unpublished	Xingdou Mountain	374.67	311.013	83.0097	63.6575	16.9903	0.204678
Broadleaved	116.02	29.95	1.62949	13.0755	4.90432	17.1	1.8	28.9	1347.4	1752.3	1745.8	29.25	38.47	22.34	27.05	1.69	7	2018	Authors	unpublished	Hubei Huangmei	383.56	303.206	79.0506	80.3537	20.9494	0.265013
Broadleaved	116.02	29.95	1.62949	13.0755	4.90432	17.1	1.8	28.9	1347.4	1752.3	1745.8	10.77	16.93	40.32	19.24	2.07	7	2018	Authors	unpublished	Hubei Huangmei	383.56	303.206	79.0506	80.3537	20.9494	0.265013
Broadleaved	116.02	29.95	1.62949	13.0755	4.90432	17.1	1.8	28.9	1347.4	1752.3	1745.8	23.32	28.46	31.23	19.89	1.85	7	2018	Authors	unpublished	Hubei Huangmei	383.56	303.206	79.0506	80.3537	20.9494	0.265013
Broadleaved	101.83	29.6666	2.56787	10.9141	6.08758	10	4.1	16.7	1600	2095.64	1893	8.65	9.5	51.245	13.98	1.28	7	2013	Authors	unpublished	Gongga Mountain	289.63	167.756	57.9209	121.874	42.0791	0.726491
Broadleaved	101.83	29.6666	2.56787	10.9141	6.08758	10	4.1	16.7	1600	2095.64	1893	32.5856	15.6	41.2	27.42	1.41	7	2013	Authors	unpublished	Gongga Mountain	289.63	167.756	57.9209	121.874	42.0791	0.726491
Broadleaved	101.83	29.6666	2.56787	10.9141	6.08758	10	4.1	16.7	1600	2095.64	1893	36.34	19.8	24.5	33.71	1.42	7	2013	Authors	unpublished	Gongga Mountain	289.63	167.756	57.9209	121.874	42.0791	0.726491
Broadleaved	101.83	29.6666	2.56787	10.9141	6.08758	10	4.1	16.7	1600	2095.64	1893	28.9	25	28.5	43.5	1.38	7	2013	Authors	unpublished	Gongga Mountain	289.63	167.756	57.9209	121.874	42.0791	0.726491
Broadleaved	101.83	29.6666	2.56787	10.9141	6.08758	10	4.1	16.7	1600	2095.64	1893	41	15	41.8199	17.58	1.26	7	2013	Authors	unpublished	Gongga Mountain	289.63	167.756	57.9209	121.874	42.0791	0.726491
Coniferous	115.8	40.5	2.831	8.15714	6.28	9.2	-8.6	22.9	493	2300	1770	30.53	47.1809	23.5105	22.2542	2.55167	7	2016	Authors	unpublished	Beijing Songshan	323.06	214.58	66.4211	108.48	33.5789	0.505545
Broadleaved	101.83	29.6666	2.68	28.47	5.97	8.5	4.1	16.7	1387	2100	1893	34.1	14.15	38.5	22.27	2.1	7	2013	Authors	unpublished	Gongga Mountain	289.63	167.756	57.9209	121.874	42.0791	0.726491
Broadleaved	101.83	29.6666	3.02	20.46	4.73	8.5	4.1	16.7	1387	2100	1893	42	10.32	38.37	13.39	1.79471	7	2013	Authors	unpublished	Gongga Mountain	289.63	167.756	57.9209	121.874	42.0791	0.726491
Broadleaved	101.83	29.6666	2.63	6.74	6.5	8.5	4.1	16.7	1387	2100	1893	8.65	16.01	37.56	24.93	1.72	7	2013	Authors	unpublished	Gongga Mountain	289.63	167.756	57.9209	121.874	42.0791	0.726491
Broadleaved	101.83	29.6666	2.68	28.47	5.97	8.5	4.1	16.7	1387	2100	1893	6.26	14.14	39.73	25.9	1.21828	7	2013	Authors	unpublished	Gongga Mountain	289.63	167.756	57.9209	121.874	42.0791	0.726491
Broadleaved	101.83	29.6666	3.02	20.46	4.73	8.5	4.1	16.7	1387	2100	1893	20.53	12.29	38.19	15.97	2.57791	7	2013	Authors	unpublished	Gongga Mountain	289.63	167.756	57.9209	121.874	42.0791	0.726491
Coniferous	115.8	40.5	4.329	8.88571	7.57	9.2	-8.6	22.9	493	2300	1770	30.41	25.7275	43.7255	15.3683	2.64861	7	2016	Authors	unpublished	Beijing Songshan	323.06	214.58	66.4211	108.48	33.5789	0.505545
Coniferous	115.8	40.5	4.055	7.27143	5.75	9.2	-8.6	22.9	493	2300	1770	30.39	34.4678	33.8976	7.88683	0.86	7	2016	Authors	unpublished	Beijing Songshan	323.06	214.58	66.4211	108.48	33.5789	0.505545
Broadleaved	101.83	29.6666	3.02	20.46	4.73	8.5	4.1	16.7	1387	2100	1893	62.5	10.53	42.26	14.33	1.89	7	2013	Authors	unpublished	Gongga Mountain	289.63	167.756	57.9209	121.874	42.0791	0.726491
Broadleaved	119.64	29.214	2.5265	12.308	4.60408	17.2	5.1	29.1	252	1708.39	1878	16.38	15.989	40.23	22.59	0.88	7	2016	Authors	unpublished	Jinhua mountain	357.87	278.484	77.8171	79.3859	22.1829	0.285064
Coniferous	115.8	40.5	6.48	11.0714	6.83	9.2	-8.6	22.9	493	2300	1770	30.11	24.1459	55.175	16.2793	2.41543	7	2016	Authors	unpublished	Beijing Songshan	323.06	214.58	66.4211	108.48	33.5789	0.505545
Coniferous	115.8	40.5	3.213	8.15714	5.66	9.2	-8.6	22.9	493	2300	1770	30.08	46.3298	23.0864	16.8683	2.5851	7	2016	Authors	unpublished	Beijing Songshan	323.06	214.58	66.4211	108.48	33.5789	0.505545
Coniferous	115.8	40.5	3.419	8.44286	6.05	9.2	-8.6	22.9	493	2300	1770	30.07	15.6194	63.009	18.9883	1.62731	7	2016	Authors	unpublished	Beijing Songshan	323.06	214.58	66.4211	108.48	33.5789	0.505545
Broadleaved	101.8	25.7	1.73514	13.4204	5.53714	21.9	14.9	27.1	613.8	1861.54	3911	26.81	6.7	47	23.67	1.4	7	2011	Literatures	Zheng et al., 2011	Yunnan dry-hot valley region	332.25	263.778	79.3914	68.4719	20.6086	0.259582
Broadleaved	101.8	25.7	1.73514	13.4204	5.53714	21.9	14.9	27.1	613.8	1861.54	3911	73.1	13.695	42	13.19	0.88	7	2011	Literatures	Zheng et al., 2011	Yunnan dry-hot valley region	332.25	263.778	79.3914	68.4719	20.6086	0.259582
Broadleaved	101.8	25.7	1.73514	13.4204	5.53714	21.9	14.9	27.1	613.8	1861.54	3911	10.77	14.304	67.8632	15.68	0.9	7	2011	Literatures	Zheng et al., 2011	Yunnan dry-hot valley region	332.25	263.778	79.3914	68.4719	20.6086	0.259582
Broadleaved	101.8	25.7	1.73514	13.4204	5.53714	21.9	14.9	27.1	613.8	1861.54	3911	24.97	17.863	53	14.05	0.88	7	2011	Literatures	Zheng et al., 2011	Yunnan dry-hot valley region	332.25	263.778	79.3914	68.4719	20.6086	0.259582
Broadleaved	101.8	25.7	1.73514	13.4204	5.53714	21.9	14.9	27.1	613.8	1861.54	3911	23.7	4.688	48.3	31.78	1.2	7	2011	Literatures	Zheng et al., 2011	Yunnan dry-hot valley region	332.25	263.778	79.3914	68.4719	20.6086	0.259582
Broadleaved	101.8	25.7	1.73514	13.4204	5.53714	21.9	14.9	27.1	613.8	1861.54	3911	44.52	6.033	41.7	25.16	1.4	7	2011	Literatures	Zheng et al., 2011	Yunnan dry-hot valley region	332.25	263.778	79.3914	68.4719	20.6086	0.259582
Broadleaved	101.8	25.7	1.73514	13.4204	5.53714	21.9	14.9	27.1	613.8	1861.54	3911	33	6.276	43.5	25.24	0.88	7	2011	Literatures	Zheng et al., 2011	Yunnan dry-hot valley region	332.25	263.778	79.3914	68.4719	20.6086	0.259582
Broadleaved	101.8	25.7	1.73514	13.4204	5.53714	21.9	14.9	27.1	613.8	1861.54	3911	32.87	6.659	48.3	27.43	0.88	7	2011	Literatures	Zheng et al., 2011	Yunnan dry-hot valley region	332.25	263.778	79.3914	68.4719	20.6086	0.259582
Broadleaved	101.8	25.7	1.73514	13.4204	5.53714	21.9	14.9	27.1	613.8	1861.54	3911	39.02	7.404	43.5	22.28	1.4	7	2011	Literatures	Zheng et al., 2011	Yunnan dry-hot valley region	332.25	263.778	79.3914	68.4719	20.6086	0.259582
Broadleaved	101.8	25.7	1.73514	13.4204	5.53714	21.9	14.9	27.1	613.8	1861.54	3911	60	7.929	58	17.28	0.6	7	2011	Literatures	Zheng et al., 2011	Yunnan dry-hot valley region	332.25	263.778	79.3914	68.4719	20.6086	0.259582
Broadleaved	101.8	25.7	1.73514	13.4204	5.53714	21.9	14.9	27.1	613.8	1861.54	3911	42	8.662	41.7	17.44	0.6	7	2011	Literatures	Zheng et al., 2011	Yunnan dry-hot valley region	332.25	263.778	79.3914	68.4719	20.6086	0.259582
Broadleaved	101.8	25.7	1.73514	13.4204	5.53714	21.9	14.9	27.1	613.8	1861.54	3911	50	9.49	47.3	13.34	0.63	7	2011	Literatures	Zheng et al., 2011	Yunnan dry-hot valley region	332.25	263.778	79.3914	68.4719	20.6086	0.259582
Broadleaved	101.8	25.7	1.73514	13.4204	5.53714	21.9	14.9	27.1	613.8	1861.54	3911	43.12	9.574	47.3	20.34	0.6	7	2011	Literatures	Zheng et al., 2011	Yunnan dry-hot valley region	332.25	263.778	79.3914	68.4719	20.6086	0.259582
Broadleaved	101.8	25.7	1.73514	13.4204	5.53714	21.9	14.9	27.1	613.8	1861.54	3911	70	11.149	41.96	14.04	0.88	7	2011	Literatures	Zheng et al., 2011	Yunnan dry-hot valley region	332.25	263.778	79.3914	68.4719	20.6086	0.259582
Broadleaved	101.8	25.7	1.73514	13.4204	5.53714	21.9	14.9	27.1	613.8	1861.54	3911	34.73	12.427	58	12.98	1.2	7	2011	Literatures	Zheng et al., 2011	Yunnan dry-hot valley region	332.25	263.778	79.3914	68.4719	20.6086	0.259582
Broadleaved	101.8	25.7	1.73514	13.4204	5.53714	21.9	14.9	27.1	613.8	1861.54	3911	24.97	14.04	58	25.12	0.88	7	2011	Literatures	Zheng et al., 2011	Yunnan dry-hot valley region	332.25	263.778	79.3914	68.4719	20.6086	0.259582
Broadleaved	101.8	25.7	1.73514	13.4204	5.53714	21.9	14.9	27.1	613.8	1861.54	3911	39.17	14.068	30	13.98	1.4	7	2011	Literatures	Zheng et al., 2011	Yunnan dry-hot valley region	332.25	263.778	79.3914	68.4719	20.6086	0.259582
Broadleaved	101.8	25.7	1.73514	13.4204	5.53714	21.9	14.9	27.1	613.8	1861.54	3911	43.41	16.072	49.64	17.47	1.2	7	2011	Literatures	Zheng et al., 2011	Yunnan dry-hot valley region	332.25	263.778	79.3914	68.4719	20.6086	0.259582
Broadleaved	105.65	25.66	1.61383	13.8596	5.21362	18.4	8.9	29.8	1100	1772.53	1456	14.94	12.3	42.1	9.8	2.2	7	2019	Authors	unpublished	Zhenfeng County karst	375.28	277.524	73.9511	97.7565	26.049	0.352246
Broadleaved	105.65	25.66	1.61383	13.8596	5.21362	18.4	8.9	29.8	1100	1772.53	1456	16.2	12.4	28.2	19.1	2.4	7	2019	Authors	unpublished	Zhenfeng County karst	375.28	277.524	73.9511	97.7565	26.049	0.352246
Coniferous	115.8	40.5	4.365	7.85714	7.21	9.2	-8.6	22.9	493	2300	1770	30.03	48.1516	23.8011	13.248	2.47205	7	2016	Authors	unpublished	Beijing Songshan	323.06	214.58	66.4211	108.48	33.5789	0.505545
Coniferous	115.8	40.5	2.603	5.98571	6.08	9.2	-8.6	22.9	493	2300	1770	30.02	23.3723	45.002	14.7436	1.8445	7	2016	Authors	unpublished	Beijing Songshan	323.06	214.58	66.4211	108.48	33.5789	0.505545
Coniferous	115.8	40.5	3.38	9.9	6.26	9.2	-8.6	22.9	493	2300	1770	30.01	29.4881	33.9776	14.7748	1.04626	7	2016	Authors	unpublished	Beijing Songshan	323.06	214.58	66.4211	108.48	33.5789	0.505545
Coniferous	115.8	40.5	2.908	6.6	5.93	9.2	-8.6	22.9	493	2300	1770	29.9	15.7946	24.3	13.2733	1.37732	7	2016	Authors	unpublished	Beijing Songshan	323.06	214.58	66.4211	108.48	33.5789	0.505545
Coniferous	115.8	40.5	4.717	13.5	5.6	9.2	-8.6	22.9	493	2300	1770	29.88	80.6562	26.4463	14.33	2.01356	7	2017	Authors	unpublished	Beijing Songshan	323.06	214.58	66.4211	108.48	33.5789	0.505545
Coniferous	115.8	40.5	4.055	7.27143	5.75	9.2	-8.6	22.9	493	2300	1770	29.83	24.2185	42.7489	12.4832	1.48101	7	2016	Authors	unpublished	Beijing Songshan	323.06	214.58	66.4211	108.48	33.5789	0.505545
Coniferous	115.8	40.5	4.365	7.85714	7.21	9.2	-8.6	22.9	493	2300	1770	29.82	33.6423	38.3575	13.5081	1.99979	7	2016	Authors	unpublished	Beijing Songshan	323.06	214.58	66.4211	108.48	33.5789	0.505545
Coniferous	115.8	40.5	2.796	6.55714	5.83	9.2	-8.6	22.9	493	2300	1770	29.71	31.0558	30.5411	15.2713	1.3504	7	2016	Authors	unpublished	Beijing Songshan	323.06	214.58	66.4211	108.48	33.5789	0.505545
Broadleaved	119.7	25.5	2.9	3.57143	4.3	19.4	11	28	1500	1919.7	1917.4	47	11.2	37.6	28.4	0.79	7	2017	Literatures	Huang et al., 2017	Fujian Pingtan Island	404.51	316.828	78.3238	87.6824	21.6762	0.276751
Broadleaved	119.7	25.5	2.9	3.57143	4.3	19.4	11	28	1500	1919.7	1917.4	47	13.2	44.1	25.2	0.76	7	2017	Literatures	Huang et al., 2017	Fujian Pingtan Island	404.51	316.828	78.3238	87.6824	21.6762	0.276751
Broadleaved	119.7	25.5	2.9	3.57143	4.3	19.4	11	28	1500	1919.7	1917.4	42	8.8	39.8	23.3	0.93	7	2017	Literatures	Huang et al., 2017	Fujian Pingtan Island	404.51	316.828	78.3238	87.6824	21.6762	0.276751
Broadleaved	119.7	25.5	2.9	3.57143	4.3	19.4	11	28	1500	1919.7	1917.4	47	9.3	38.4	22.9	0.61	7	2017	Literatures	Huang et al., 2017	Fujian Pingtan Island	404.51	316.828	78.3238	87.6824	21.6762	0.276751
Broadleaved	108.366	23.45	1.84762	14.4599	4.74932	15.1	5.8	21.9	2630	1635.1	1984	82.79	15.6	38	16.3	1.7	10	2012	Literatures	Xie et al., 2012	Guangxi Daming Mountain	391.16	293.612	75.0619	97.5479	24.9381	0.332234
Broadleaved	108.366	23.45	1.84762	14.4599	4.74932	15.1	5.8	21.9	2630	1635.1	1984	81.69	12.2	43	13.8	1.4	10	2012	Literatures	Xie et al., 2012	Guangxi Daming Mountain	391.16	293.612	75.0619	97.5479	24.9381	0.332234
Broadleaved	108.366	23.45	1.84762	14.4599	4.74932	15.1	5.8	21.9	2630	1635.1	1984	79.74	13.8	36.4	13.3	1.2	10	2012	Literatures	Xie et al., 2012	Guangxi Daming Mountain	391.16	293.612	75.0619	97.5479	24.9381	0.332234
Broadleaved	107.5	23.1	1.37868	15.1778	4.73523	21	13.2	26.6	1400	1500	1734	82.79	7.806	47.1	15.97	0.66	11	2017	Literatures	O et al., 2017	Southwest Guangxi	392.65	297.143	75.6762	95.5075	24.3238	0.32142
Broadleaved	107.5	23.1	1.37868	15.1778	4.73523	21	13.2	26.6	1400	1500	1734	88.09	8.381	44	15.93	0.73	11	2017	Literatures	O et al., 2017	Southwest Guangxi	392.65	297.143	75.6762	95.5075	24.3238	0.32142
Broadleaved	107.5	23.1	1.37868	15.1778	4.73523	21	13.2	26.6	1400	1500	1734	79.74	7.795	45	17.23	0.66	11	2017	Literatures	O et al., 2017	Southwest Guangxi	392.65	297.143	75.6762	95.5075	24.3238	0.32142
Broadleaved	107.5	23.1	1.37868	15.1778	4.73523	21	13.2	26.6	1400	1500	1734	81.69	8.846	41	17.89	0.66	11	2017	Literatures	O et al., 2017	Southwest Guangxi	392.65	297.143	75.6762	95.5075	24.3238	0.32142
Broadleaved	107.5	23.1	1.37868	15.1778	4.73523	21	13.2	26.6	1400	1500	1734	81.73	6.75	54	13.23	0.58	11	2017	Literatures	O et al., 2017	Southwest Guangxi	392.65	297.143	75.6762	95.5075	24.3238	0.32142
Broadleaved	103.7	23.1	2.08711	13.9328	5.10129	14.3	2.1	26.7	1650	1731.74	1989	37.36	9.75	41.2644	13.8738	1.56831	7	2019	Literatures	Li et al., 2019	Great Black Mountain Karst	337.19	234.455	69.5321	102.735	30.4679	0.438184
Broadleaved	103.7	23.1	2.0864	13.9338	5.10123	14.3	2.1	26.7	1650	1731.69	1990	28.9	10.48	39.6464	17.2878	1.68203	7	2019	Literatures	Li et al., 2019	Great Black Mountain Karst	337.19	234.455	69.5321	102.735	30.4679	0.438184
Broadleaved	103.7	23.1	2.07998	13.9428	5.10067	14.3	2.1	26.7	1650	1731.24	1991	16.38	9.95	44.2564	17.1158	1.53726	7	2019	Literatures	Li et al., 2019	Great Black Mountain Karst	337.19	234.455	69.5321	102.735	30.4679	0.438184
Broadleaved	107.5	23	1.23297	15.4157	4.71038	20.5	8.5	30.9	1400	1589.74	1180	79.74	7.8	45	17.23	0.66	11	2017	Literatures	Wang et al., 2017	Southwest Guangxi	421.41	325.508	77.2426	95.9021	22.7574	0.294623
Broadleaved	107.5	23	1.23297	15.4157	4.71038	20.5	8.5	30.9	1400	1589.74	1180	81.69	8.85	41	17.89	0.66	11	2017	Literatures	Wang et al., 2017	Southwest Guangxi	421.41	325.508	77.2426	95.9021	22.7574	0.294623
Broadleaved	107.5	23	1.23297	15.4157	4.71038	20.5	8.5	30.9	1400	1589.74	1180	88.09	8.38	44	15.93	0.73	11	2017	Literatures	Wang et al., 2017	Southwest Guangxi	421.41	325.508	77.2426	95.9021	22.7574	0.294623
Broadleaved	107.5	23	1.23297	15.4157	4.71038	20.5	8.5	30.9	1400	1589.74	1180	81.73	6.75	54	13.23	0.58	11	2017	Literatures	Wang et al., 2017	Southwest Guangxi	421.41	325.508	77.2426	95.9021	22.7574	0.294623
Broadleaved	101.25	21.933	1.09778	15.5509	5.06955	21.7	10.5	31	1550	1660.65	1369	36.87	4.535	41.64	19.19	2.2	7	2011	Literatures	Zhou et al., 2011	Xishuangbanna	367.17	270.644	73.7109	96.5258	26.2891	0.356652
Broadleaved	101.25	21.933	1.09778	15.5509	5.06955	21.7	10.5	31	1550	1660.65	1369	17.03	4.769	32	18.31	0.66	7	2011	Literatures	Zhou et al., 2011	Xishuangbanna	367.17	270.644	73.7109	96.5258	26.2891	0.356652
Broadleaved	101.25	21.933	1.09778	15.5509	5.06955	21.7	10.5	31	1550	1660.65	1369	17.87	4.979	43.1	28.82	1.7	7	2011	Literatures	Zhou et al., 2011	Xishuangbanna	367.17	270.644	73.7109	96.5258	26.2891	0.356652
Broadleaved	101.25	21.933	1.09778	15.5509	5.06955	21.7	10.5	31	1550	1660.65	1369	25.34	5.043	67.8632	30.58	2.07	7	2011	Literatures	Zhou et al., 2011	Xishuangbanna	367.17	270.644	73.7109	96.5258	26.2891	0.356652
Broadleaved	101.25	21.933	1.09778	15.5509	5.06955	21.7	10.5	31	1550	1660.65	1369	19.38	5.048	42.1	18.17	0.66	7	2011	Literatures	Zhou et al., 2011	Xishuangbanna	367.17	270.644	73.7109	96.5258	26.2891	0.356652
Broadleaved	101.25	21.933	1.09778	15.5509	5.06955	21.7	10.5	31	1550	1660.65	1369	25.15	5.188	66	11.8	0.54	7	2011	Literatures	Zhou et al., 2011	Xishuangbanna	367.17	270.644	73.7109	96.5258	26.2891	0.356652
Broadleaved	101.25	21.933	1.09778	15.5509	5.06955	21.7	10.5	31	1550	1660.65	1369	31.37	5.282	55	21.22	0.972871	7	2011	Literatures	Zhou et al., 2011	Xishuangbanna	367.17	270.644	73.7109	96.5258	26.2891	0.356652
Broadleaved	101.25	21.933	1.09778	15.5509	5.06955	21.7	10.5	31	1550	1660.65	1369	50	5.343	43.6	20.15	0.61	7	2011	Literatures	Zhou et al., 2011	Xishuangbanna	367.17	270.644	73.7109	96.5258	26.2891	0.356652
Broadleaved	101.25	21.933	1.09778	15.5509	5.06955	21.7	10.5	31	1550	1660.65	1369	17.03	5.85	49.64	15.8	1.14695	7	2011	Literatures	Zhou et al., 2011	Xishuangbanna	367.17	270.644	73.7109	96.5258	26.2891	0.356652
Broadleaved	101.25	21.933	1.09778	15.5509	5.06955	21.7	10.5	31	1550	1660.65	1369	13	5.876	47	36.71	1.5	7	2011	Literatures	Zhou et al., 2011	Xishuangbanna	367.17	270.644	73.7109	96.5258	26.2891	0.356652
Broadleaved	101.25	21.933	1.09778	15.5509	5.06955	21.7	10.5	31	1550	1660.65	1369	21.45	6.144	47	15.57	1.36	7	2011	Literatures	Zhou et al., 2011	Xishuangbanna	367.17	270.644	73.7109	96.5258	26.2891	0.356652
Broadleaved	101.25	21.933	1.09778	15.5509	5.06955	21.7	10.5	31	1550	1660.65	1369	18.97	7.311	45.18	25.8	1.48	7	2011	Literatures	Zhou et al., 2011	Xishuangbanna	367.17	270.644	73.7109	96.5258	26.2891	0.356652
Broadleaved	101.25	21.933	1.09778	15.5509	5.06955	21.7	10.5	31	1550	1660.65	1369	25.15	8.949	33.1	17.83	0.48	7	2011	Literatures	Zhou et al., 2011	Xishuangbanna	367.17	270.644	73.7109	96.5258	26.2891	0.356652
Broadleaved	101.25	21.933	1.09778	15.5509	5.06955	21.7	10.5	31	1550	1660.65	1369	17.03	9.031	32.3	18.93	0.53	7	2011	Literatures	Zhou et al., 2011	Xishuangbanna	367.17	270.644	73.7109	96.5258	26.2891	0.356652
Broadleaved	101.25	21.933	1.09778	15.5509	5.06955	21.7	10.5	31	1550	1660.65	1369	10.97	9.316	43.32	11.89	1.37512	7	2011	Literatures	Zhou et al., 2011	Xishuangbanna	367.17	270.644	73.7109	96.5258	26.2891	0.356652
Broadleaved	101.25	21.933	1.09778	15.5509	5.06955	21.7	10.5	31	1550	1660.65	1369	28.81	5.712	49.6	17.73	0.76	7	2011	Literatures	Zhou et al., 2011	Xishuangbanna	367.17	270.644	73.7109	96.5258	26.2891	0.356652
Broadleaved	101.25	21.933	1.09778	15.5509	5.06955	21.7	10.5	31	1550	1660.65	1369	50.06	7.162	49.64	20.65	1.04	7	2011	Literatures	Zhou et al., 2011	Xishuangbanna	367.17	270.644	73.7109	96.5258	26.2891	0.356652
Broadleaved	108.95	19.1	1.02191	17.1268	4.10397	22.5	9.8	30.8	2553	1371.9	2015	82.79	13.5	12.3	15.1	0.6	7	2012	Literatures	Lu et al., 2012	Bawangling	444.26	343.123	77.2347	101.137	22.7653	0.294754
Broadleaved	81.1	43.8	0.72	1.17	8.8	10.3	-7	24.7	301.6	3000	1550	89.38	8.925	38.69	36.33	1.66	8	2020	Literatures	Xu et al., 2020	Yili	41.65	19.6739	47.2362	21.9761	52.7638	1.11702
Broadleaved	81.1	43.8	0.72	1.17	8.8	10.3	-7	24.7	301.6	3000	1550	78.49	9.534	36.82	19.78	0.665935	8	2020	Literatures	Xu et al., 2020	Yili	41.65	19.6739	47.2362	21.9761	52.7638	1.11702
Broadleaved	81.1	43.8	0.72	1.17	8.8	10.3	-7	24.7	301.6	3000	1550	72.5	9.807	37.83	34.2	1.83875	8	2020	Literatures	Xu et al., 2020	Yili	41.65	19.6739	47.2362	21.9761	52.7638	1.11702
Broadleaved	81.1	43.8	0.72	1.17	8.8	10.3	-7	24.7	301.6	3000	1550	81.21	10.74	37.11	36.55	1.83875	8	2020	Literatures	Xu et al., 2020	Yili	41.65	19.6739	47.2362	21.9761	52.7638	1.11702
Broadleaved	81.1	43.8	0.72	1.17	8.8	10.3	-7	24.7	301.6	3000	1550	88.04	8.633	45.8	36.33	2.3	8	2020	Literatures	Xu et al., 2020	Yili	41.65	19.6739	47.2362	21.9761	52.7638	1.11702
Broadleaved	81.1	43.8	0.72	1.17	8.8	10.3	-7	24.7	301.6	3000	1550	99.85	9.71	36.07	34.2	2.3	8	2020	Literatures	Xu et al., 2020	Yili	41.65	19.6739	47.2362	21.9761	52.7638	1.11702
Broadleaved	81.1	43.8	0.72	1.17	8.8	10.3	-7	24.7	301.6	3000	1550	86.46	11.79	44.4	19.78	0.665935	8	2020	Literatures	Xu et al., 2020	Yili	41.65	19.6739	47.2362	21.9761	52.7638	1.11702
Broadleaved	81.1	43.8	0.72	1.17	8.8	10.3	-7	24.7	301.6	3000	1550	62.04	1.4586	35.61	34.2	2.3	8	2020	Literatures	Xu et al., 2020	Yili	41.65	19.6739	47.2362	21.9761	52.7638	1.11702
Broadleaved	81.1	43.8	0.72	1.17	8.8	10.3	-7	24.7	301.6	3000	1550	59.97	1.3211	34.69	19.78	0.665935	8	2020	Literatures	Xu et al., 2020	Yili	41.65	19.6739	47.2362	21.9761	52.7638	1.11702
Broadleaved	81.1	43.8	0.72	1.17	8.8	10.3	-7	24.7	301.6	3000	1550	95.5	10.673	35.95	39.97	1.1	8	2020	Literatures	Xu et al., 2020	Yili	41.65	19.6739	47.2362	21.9761	52.7638	1.11702
Broadleaved	81.1	43.8	0.72	1.17	8.8	10.3	-7	24.7	301.6	3000	1550	72.11	9.973	37.97	36.33	1.1	8	2020	Literatures	Xu et al., 2020	Yili	41.65	19.6739	47.2362	21.9761	52.7638	1.11702
Broadleaved	81.1	43.8	0.72	1.17	8.8	10.3	-7	24.7	301.6	3000	1550	79.33	12.012	37.6	39.97	1.66	8	2020	Literatures	Xu et al., 2020	Yili	41.65	19.6739	47.2362	21.9761	52.7638	1.11702
Broadleaved	81.1	43.8	0.72	1.17	8.8	10.3	-7	24.7	301.6	3000	1550	93.94	10.632	38.89	39.97	1.1	8	2020	Literatures	Xu et al., 2020	Yili	41.65	19.6739	47.2362	21.9761	52.7638	1.11702
Broadleaved	81.1	43.8	0.72	1.17	8.8	10.3	-7	24.7	301.6	3000	1550	66.84	11.89	37.71	39.97	1.66	8	2020	Literatures	Xu et al., 2020	Yili	41.65	19.6739	47.2362	21.9761	52.7638	1.11702
Broadleaved	81.1	43.8	0.72	1.17	8.8	10.3	-7	24.7	301.6	3000	1550	76.85	1.255	35.04	34.2	1.66	8	2020	Literatures	Xu et al., 2020	Yili	41.65	19.6739	47.2362	21.9761	52.7638	1.11702
Broadleaved	81.1	43.8	0.72	1.17	8.8	10.3	-7	24.7	301.6	3000	1550	70.39	12.091	37.13	19.78	0.665935	8	2020	Literatures	Xu et al., 2020	Yili	41.65	19.6739	47.2362	21.9761	52.7638	1.11702
Broadleaved	81.1	43.8	0.72	1.17	8.8	10.3	-7	24.7	301.6	3000	1550	96.5	10.584	35.53	36.33	1.66	8	2020	Literatures	Xu et al., 2020	Yili	41.65	19.6739	47.2362	21.9761	52.7638	1.11702
Broadleaved	81.1	43.8	0.72	1.17	8.8	10.3	-7	24.7	301.6	3000	1550	72.79	10.725	39.83	36.55	1.1	8	2020	Literatures	Xu et al., 2020	Yili	41.65	19.6739	47.2362	21.9761	52.7638	1.11702
Broadleaved	81.1	43.8	0.72	1.17	8.8	10.3	-7	24.7	301.6	3000	1550	71.54	10.535	37.72	36.55	1.1	8	2020	Literatures	Xu et al., 2020	Yili	41.65	19.6739	47.2362	21.9761	52.7638	1.11702
Broadleaved	81.1	43.8	0.72	1.17	8.8	10.3	-7	24.7	301.6	3000	1550	80.76	11.02	38.52	36.33	1.83875	8	2020	Literatures	Xu et al., 2020	Yili	41.65	19.6739	47.2362	21.9761	52.7638	1.11702
Broadleaved	81.1	43.8	0.72	1.17	8.8	10.3	-7	24.7	301.6	3000	1550	72.27	10.17	38.74	36.55	1.83875	8	2020	Literatures	Xu et al., 2020	Yili	41.65	19.6739	47.2362	21.9761	52.7638	1.11702
Broadleaved	81.1	43.8	0.72	1.17	8.8	10.3	-7	24.7	301.6	3000	1550	85.93	10.404	39	19.78	0.665935	8	2020	Literatures	Xu et al., 2020	Yili	41.65	19.6739	47.2362	21.9761	52.7638	1.11702
Broadleaved	81.1	43.8	0.72	1.17	8.8	10.3	-7	24.7	301.6	3000	1550	65.6	1.256	38.09	35.87	1.1	8	2020	Literatures	Xu et al., 2020	Yili	41.65	19.6739	47.2362	21.9761	52.7638	1.11702
Broadleaved	81.1	43.8	0.72	1.17	8.8	10.3	-7	24.7	301.6	3000	1550	83.61	10.516	36.61	19.78	0.665935	8	2020	Literatures	Xu et al., 2020	Yili	41.65	19.6739	47.2362	21.9761	52.7638	1.11702
Broadleaved	81.1	43.8	0.72	1.17	8.8	10.3	-7	24.7	301.6	3000	1550	65.39	9.99	40.36	36.55	2.3	8	2020	Literatures	Xu et al., 2020	Yili	41.65	19.6739	47.2362	21.9761	52.7638	1.11702
Broadleaved	81.1	43.8	0.72	1.17	8.8	10.3	-7	24.7	301.6	3000	1550	87.1	11.239	36.98	36.55	1.83875	8	2020	Literatures	Xu et al., 2020	Yili	41.65	19.6739	47.2362	21.9761	52.7638	1.11702
Broadleaved	81.1	43.8	0.72	1.17	8.8	10.3	-7	24.7	301.6	3000	1550	89.59	9.062	41.32	34.2	1.66	8	2020	Literatures	Xu et al., 2020	Yili	41.65	19.6739	47.2362	21.9761	52.7638	1.11702
Broadleaved	81.1	43.8	0.72	1.17	8.8	10.3	-7	24.7	301.6	3000	1550	89.88	10.186	39.14	36.55	1.66	8	2020	Literatures	Xu et al., 2020	Yili	41.65	19.6739	47.2362	21.9761	52.7638	1.11702
Broadleaved	81.1	43.8	0.72	1.17	8.8	10.3	-7	24.7	301.6	3000	1550	75.72	10.927	38.69	36.33	2.3	8	2020	Literatures	Xu et al., 2020	Yili	41.65	19.6739	47.2362	21.9761	52.7638	1.11702
Broadleaved	81.1	43.8	0.72	1.17	8.8	10.3	-7	24.7	301.6	3000	1550	62.62	11.709	40.71	35.87	1.83875	8	2020	Literatures	Xu et al., 2020	Yili	41.65	19.6739	47.2362	21.9761	52.7638	1.11702
Broadleaved	81.1	43.8	0.72	1.17	8.8	10.3	-7	24.7	301.6	3000	1550	67.05	10.305	39.43	36.55	1.83875	8	2020	Literatures	Xu et al., 2020	Yili	41.65	19.6739	47.2362	21.9761	52.7638	1.11702
Broadleaved	81.1	43.8	0.72	1.17	8.8	10.3	-7	24.7	301.6	3000	1550	65.44	1.4527	36.15	34.2	2.3	8	2020	Literatures	Xu et al., 2020	Yili	41.65	19.6739	47.2362	21.9761	52.7638	1.11702
Broadleaved	81.1	43.8	0.72	1.17	8.8	10.3	-7	24.7	301.6	3000	1550	74.98	11.298	39.32	19.78	0.665935	8	2020	Literatures	Xu et al., 2020	Yili	41.65	19.6739	47.2362	21.9761	52.7638	1.11702
Broadleaved	81.1	43.8	0.72	1.17	8.8	10.3	-7	24.7	301.6	3000	1550	78.44	8.997	39.4	36.55	2.3	8	2020	Literatures	Xu et al., 2020	Yili	41.65	19.6739	47.2362	21.9761	52.7638	1.11702
Broadleaved	81.1	43.8	0.72	1.17	8.8	10.3	-7	24.7	301.6	3000	1550	80.37	11.147	38.18	36.33	1.1	8	2020	Literatures	Xu et al., 2020	Yili	41.65	19.6739	47.2362	21.9761	52.7638	1.11702
Broadleaved	81.1	43.8	0.72	1.17	8.8	10.3	-7	24.7	301.6	3000	1550	87.33	10.274	38.79	36.55	1.83875	8	2020	Literatures	Xu et al., 2020	Yili	41.65	19.6739	47.2362	21.9761	52.7638	1.11702
Broadleaved	81.1	43.8	0.72	1.17	8.8	10.3	-7	24.7	301.6	3000	1550	69.18	12.031	39.7	35.87	1.83875	8	2020	Literatures	Xu et al., 2020	Yili	41.65	19.6739	47.2362	21.9761	52.7638	1.11702
Broadleaved	81.1	43.8	0.72	1.17	8.8	10.3	-7	24.7	301.6	3000	1550	83.75	1.2828	36.32	35.87	1.1	8	2020	Literatures	Xu et al., 2020	Yili	41.65	19.6739	47.2362	21.9761	52.7638	1.11702
Broadleaved	82.5	40.8	0.964708	8.1112	8.84125	10.4	-11.8	30.8	48.5	3075	1998.4	9.07	8.995	32.1	36.33	1.83875	7	2017	Literatures	Wei et al., 2017	Tarim River dry swim	114.89	65.8036	57.2753	49.0864	42.7247	0.745954
Broadleaved	82.5	40.8	0.964708	8.1112	8.84125	10.4	-11.8	30.8	48.5	3075	1998.4	9.05	9.003	32.2	19.78	0.665935	7	2017	Literatures	Wei et al., 2017	Tarim River dry swim	114.89	65.8036	57.2753	49.0864	42.7247	0.745954
Coniferous	115.8	40.5	3.731	7.41429	5.72	9.2	-8.6	22.9	493	2300	1770	29.7	29.0011	33.0706	18.326	0.982961	7	2016	Authors	unpublished	Beijing Songshan	323.06	214.58	66.4211	108.48	33.5789	0.505545
Coniferous	115.8	40.5	6.165	8.98571	6.03	9.2	-8.6	22.9	493	2300	1770	29.29	35.1102	34.6209	14.8835	0.96759	7	2016	Authors	unpublished	Beijing Songshan	323.06	214.58	66.4211	108.48	33.5789	0.505545
Coniferous	115.8	40.5	3.38	9.9	6.26	9.2	-8.6	22.9	493	2300	1770	29.03	41.2846	35.0228	8.18386	0.971703	7	2016	Authors	unpublished	Beijing Songshan	323.06	214.58	66.4211	108.48	33.5789	0.505545
Coniferous	115.8	40.5	3.933	8.14286	7.31	9.2	-8.6	22.9	493	2300	1770	28.88	81.4839	23.8462	14.492	1.87856	7	2017	Authors	unpublished	Beijing Songshan	323.06	214.58	66.4211	108.48	33.5789	0.505545
Coniferous	115.8	40.5	4.329	8.88571	7.57	9.2	-8.6	22.9	493	2300	1770	28.81	28.2995	43.3806	13.4023	0.375011	7	2016	Authors	unpublished	Beijing Songshan	323.06	214.58	66.4211	108.48	33.5789	0.505545
Coniferous	115.8	40.5	2.603	5.98571	6.08	9.2	-8.6	22.9	493	2300	1770	28.58	24.2939	45.7139	8.22514	1.34616	7	2016	Authors	unpublished	Beijing Songshan	323.06	214.58	66.4211	108.48	33.5789	0.505545
Coniferous	115.8	40.5	6.165	8.98571	6.03	9.2	-8.6	22.9	493	2300	1770	28.53	24.4838	42.9839	11.9065	1.39907	7	2016	Authors	unpublished	Beijing Songshan	323.06	214.58	66.4211	108.48	33.5789	0.505545
Coniferous	115.8	40.5	6.48	11.0714	6.83	9.2	-8.6	22.9	493	2300	1770	28.51	28.1746	35.5932	14.063	1.46638	7	2016	Authors	unpublished	Beijing Songshan	323.06	214.58	66.4211	108.48	33.5789	0.505545
Coniferous	115.8	40.5	4.365	7.85714	7.21	9.2	-8.6	22.9	493	2300	1770	28.43	36.1953	31.8182	11.4268	1.53307	7	2016	Authors	unpublished	Beijing Songshan	323.06	214.58	66.4211	108.48	33.5789	0.505545
Coniferous	115.8	40.5	3.854	8.02857	5.75	9.2	-8.6	22.9	493	2300	1770	28.39	23.1782	38.2908	15.102	2.13348	7	2016	Authors	unpublished	Beijing Songshan	323.06	214.58	66.4211	108.48	33.5789	0.505545
Coniferous	115.8	40.5	5.514	11.3429	5.32	9.2	-8.6	22.9	493	2300	1770	28.34	19.7522	65.752	16.1759	0.84	7	2016	Authors	unpublished	Beijing Songshan	323.06	214.58	66.4211	108.48	33.5789	0.505545
Coniferous	115.8	40.5	5.514	11.3429	5.32	9.2	-8.6	22.9	493	2300	1770	28.33	30.5693	37.4594	12.332	1.18678	7	2016	Authors	unpublished	Beijing Songshan	323.06	214.58	66.4211	108.48	33.5789	0.505545
Coniferous	115.8	40.5	6.165	8.98571	6.03	9.2	-8.6	22.9	493	2300	1770	28.31	14.4953	23.2	15.1261	2.77698	7	2016	Authors	unpublished	Beijing Songshan	323.06	214.58	66.4211	108.48	33.5789	0.505545
Coniferous	115.8	40.5	4.055	7.27143	5.75	9.2	-8.6	22.9	493	2300	1770	28.15	24.8788	38.8998	16.5847	2.57791	7	2016	Authors	unpublished	Beijing Songshan	323.06	214.58	66.4211	108.48	33.5789	0.505545
Coniferous	115.8	40.5	4.383	9.4	5.54	9.2	-8.6	22.9	493	2300	1770	27.93	34.432	31.5906	14.598	1.04959	7	2016	Authors	unpublished	Beijing Songshan	323.06	214.58	66.4211	108.48	33.5789	0.505545
Coniferous	115.8	40.5	3.854	8.02857	5.75	9.2	-8.6	22.9	493	2300	1770	27.86	19.207	31.5646	13.0972	1.88736	7	2016	Authors	unpublished	Beijing Songshan	323.06	214.58	66.4211	108.48	33.5789	0.505545
Coniferous	115.8	40.5	4.717	13.5	5.6	9.2	-8.6	22.9	493	2300	1770	27.73	61.6667	25.4902	15.483	1.2789	7	2017	Authors	unpublished	Beijing Songshan	323.06	214.58	66.4211	108.48	33.5789	0.505545
Coniferous	115.8	40.5	3.629	6.07143	6.14	9.2	-8.6	22.9	493	2300	1770	27.7	15.8	32.4	11.748	0.9	6	2019	Authors	unpublished	Guangxi Hengxian Town	323.06	214.58	66.4211	108.48	33.5789	0.505545
Coniferous	115.8	40.5	3.532	8.02857	5.94	9.2	-8.6	22.9	493	2300	1770	27.66	21.4748	45.9314	15.3584	1.26477	7	2016	Authors	unpublished	Beijing Songshan	323.06	214.58	66.4211	108.48	33.5789	0.505545
Coniferous	115.8	40.5	3.419	8.44286	6.05	9.2	-8.6	22.9	493	2300	1770	27.58	21.223	45.3929	16.3503	1.22593	7	2016	Authors	unpublished	Beijing Songshan	323.06	214.58	66.4211	108.48	33.5789	0.505545
Coniferous	115.8	40.5	4.329	8.88571	7.57	9.2	-8.6	22.9	493	2300	1770	27.58	14.2788	26.48	22.92	2.3	6	2018	Authors	unpublished	Lanzhou	323.06	214.58	66.4211	108.48	33.5789	0.505545
Coniferous	115.8	40.5	6.165	8.98571	6.03	9.2	-8.6	22.9	493	2300	1770	27.57	17.3397	63.2929	13.4526	1.88611	7	2016	Authors	unpublished	Beijing Songshan	323.06	214.58	66.4211	108.48	33.5789	0.505545
Coniferous	115.8	40.5	2.908	6.6	5.93	9.2	-8.6	22.9	493	2300	1770	27.28	38.8686	38.4517	9.59042	2.70145	7	2016	Authors	unpublished	Beijing Songshan	323.06	214.58	66.4211	108.48	33.5789	0.505545
Coniferous	115.8	40.5	2.603	5.98571	6.08	9.2	-8.6	22.9	493	2300	1770	27.23	33.1437	32.0858	14.6161	1.79471	7	2016	Authors	unpublished	Beijing Songshan	323.06	214.58	66.4211	108.48	33.5789	0.505545
Coniferous	115.8	40.5	1.314	5.37143	6.47	9.2	-8.6	22.9	493	2300	1770	27.21	28.5153	44.2214	17.4005	0.873253	7	2016	Authors	unpublished	Beijing Songshan	323.06	214.58	66.4211	108.48	33.5789	0.505545
Coniferous	115.8	40.5	4.053	6.04286	6	9.2	-8.6	22.9	493	2300	1770	27.18	29.987	36.8195	13.4828	2.21933	7	2016	Authors	unpublished	Beijing Songshan	323.06	214.58	66.4211	108.48	33.5789	0.505545
Coniferous	115.8	40.5	6.48	11.0714	6.83	9.2	-8.6	22.9	493	2300	1770	27.15	73.8019	16.4564	28.3479	1.95528	7	2016	Authors	unpublished	Beijing Songshan	323.06	214.58	66.4211	108.48	33.5789	0.505545
Coniferous	115.8	40.5	4.365	7.85714	7.21	9.2	-8.6	22.9	493	2300	1770	27.12	29.5176	41.8936	15.3844	1.2	7	2016	Authors	unpublished	Beijing Songshan	323.06	214.58	66.4211	108.48	33.5789	0.505545
Coniferous	115.8	40.5	3.38	9.9	6.26	9.2	-8.6	22.9	493	2300	1770	27.09	39.2228	31.3312	16.9918	0.985986	7	2016	Authors	unpublished	Beijing Songshan	323.06	214.58	66.4211	108.48	33.5789	0.505545
Coniferous	115.8	40.5	3.149	6.07143	5.87	9.2	-8.6	22.9	493	2300	1770	27.01	15.3013	26	16.8971	1.62148	7	2016	Authors	unpublished	Beijing Songshan	323.06	214.58	66.4211	108.48	33.5789	0.505545
Coniferous	115.8	40.5	5.514	11.3429	5.32	9.2	-8.6	22.9	493	2300	1770	26.98	31.1295	30.6956	14.9507	1.30132	7	2016	Authors	unpublished	Beijing Songshan	323.06	214.58	66.4211	108.48	33.5789	0.505545
Coniferous	115.8	40.5	4.472	10.6429	5.9	9.2	-8.6	22.9	493	2300	1770	26.96	4	46.1	15.1	0.95	9	2007	Authors	unpublished	Mount Tianshan	323.06	214.58	66.4211	108.48	33.5789	0.505545
Coniferous	115.8	40.5	4.329	8.88571	7.57	9.2	-8.6	22.9	493	2300	1770	26.94	17.843	51.6102	13.1568	2.05903	7	2016	Authors	unpublished	Beijing Songshan	323.06	214.58	66.4211	108.48	33.5789	0.505545
Coniferous	115.8	40.5	4.717	13.5	5.6	9.2	-8.6	22.9	493	2300	1770	26.94	17.6	31.2	12.334	0.85	6	2019	Authors	unpublished	Guangxi Hengxian Town	323.06	214.58	66.4211	108.48	33.5789	0.505545
Coniferous	115.8	40.5	4.365	7.85714	7.21	9.2	-8.6	22.9	493	2300	1770	26.85	33.0339	36.2327	9.42933	0.419018	7	2016	Authors	unpublished	Beijing Songshan	323.06	214.58	66.4211	108.48	33.5789	0.505545
Coniferous	115.8	40.5	3.991	8.61429	5.68	9.2	-8.6	22.9	493	2300	1770	26.82	23.431	38.694	16.8233	1.21233	7	2016	Authors	unpublished	Beijing Songshan	323.06	214.58	66.4211	108.48	33.5789	0.505545
Coniferous	115.8	40.5	3.854	8.02857	5.75	9.2	-8.6	22.9	493	2300	1770	26.74	23.8085	40.8163	12.3781	2.34322	7	2016	Authors	unpublished	Beijing Songshan	323.06	214.58	66.4211	108.48	33.5789	0.505545
Coniferous	115.8	40.5	3.38	9.9	6.26	9.2	-8.6	22.9	493	2300	1770	26.67	30.3392	41.6149	16.7947	1.40462	7	2016	Authors	unpublished	Beijing Songshan	323.06	214.58	66.4211	108.48	33.5789	0.505545
Coniferous	115.8	40.5	4.472	10.6429	5.9	9.2	-8.6	22.9	493	2300	1770	26.64	29.085	34.4905	13.8086	1.18678	7	2016	Authors	unpublished	Beijing Songshan	323.06	214.58	66.4211	108.48	33.5789	0.505545
Coniferous	115.8	40.5	3.38	9.9	6.26	9.2	-8.6	22.9	493	2300	1770	26.61	44.5491	18.2326	17.6035	1.32438	7	2016	Authors	unpublished	Beijing Songshan	323.06	214.58	66.4211	108.48	33.5789	0.505545
Coniferous	115.8	40.5	6.165	8.98571	6.03	9.2	-8.6	22.9	493	2300	1770	26.38	20.3489	43.29	8.935	1.83875	7	2016	Authors	unpublished	Beijing Songshan	323.06	214.58	66.4211	108.48	33.5789	0.505545
Coniferous	115.8	40.5	3.761	9.5	5.64	9.2	-8.6	22.9	493	2300	1770	26.23	23.1904	43.5526	6.13593	1.57381	7	2016	Authors	unpublished	Beijing Songshan	323.06	214.58	66.4211	108.48	33.5789	0.505545
Coniferous	115.8	40.5	3.854	8.02857	5.75	9.2	-8.6	22.9	493	2300	1770	26.15	25.4661	36.3019	17.7792	1.97691	7	2016	Authors	unpublished	Beijing Songshan	323.06	214.58	66.4211	108.48	33.5789	0.505545
Coniferous	115.8	40.5	1.314	5.37143	6.47	9.2	-8.6	22.9	493	2300	1770	26.13	14.6159	21.1969	10.4462	1.16306	7	2016	Authors	unpublished	Beijing Songshan	323.06	214.58	66.4211	108.48	33.5789	0.505545
Coniferous	115.8	40.5	4.717	13.5	5.6	9.2	-8.6	22.9	493	2300	1770	26.1	23.0335	43.2579	14.8143	1.10734	7	2016	Authors	unpublished	Beijing Songshan	323.06	214.58	66.4211	108.48	33.5789	0.505545
Coniferous	115.8	40.5	3.731	7.41429	5.72	9.2	-8.6	22.9	493	2300	1770	26.05	39.1103	36.3049	17.2534	1.402	7	2016	Authors	unpublished	Beijing Songshan	323.06	214.58	66.4211	108.48	33.5789	0.505545
Coniferous	115.8	40.5	2.831	8.15714	6.28	9.2	-8.6	22.9	493	2300	1770	25.99	84.1656	43	9.7542	1.52397	7	2016	Authors	unpublished	Beijing Songshan	323.06	214.58	66.4211	108.48	33.5789	0.505545
Coniferous	115.8	40.5	2.831	8.15714	6.28	9.2	-8.6	22.9	493	2300	1770	25.92	35.4781	37.5076	13.511	1.12018	7	2016	Authors	unpublished	Beijing Songshan	323.06	214.58	66.4211	108.48	33.5789	0.505545
Coniferous	115.8	40.5	4.383	9.4	5.54	9.2	-8.6	22.9	493	2300	1770	25.84	34.4538	26.5677	14.6075	0.992952	7	2016	Authors	unpublished	Beijing Songshan	323.06	214.58	66.4211	108.48	33.5789	0.505545
Coniferous	115.8	40.5	4.383	9.4	5.54	9.2	-8.6	22.9	493	2300	1770	25.81	28.1274	40.6663	13.0867	1.83291	7	2016	Authors	unpublished	Beijing Songshan	323.06	214.58	66.4211	108.48	33.5789	0.505545
Coniferous	115.8	40.5	4.472	10.6429	5.9	9.2	-8.6	22.9	493	2300	1770	25.8	34.2753	30.2115	14.449	2.38575	7	2016	Authors	unpublished	Beijing Songshan	323.06	214.58	66.4211	108.48	33.5789	0.505545
Coniferous	115.8	40.5	2.831	8.15714	6.28	9.2	-8.6	22.9	493	2300	1770	25.77	21.1603	37.1492	17.3476	2.44378	7	2016	Authors	unpublished	Beijing Songshan	323.06	214.58	66.4211	108.48	33.5789	0.505545
Coniferous	115.8	40.5	3.419	8.44286	6.05	9.2	-8.6	22.9	493	2300	1770	25.59	19.5696	27.2	18.2226	1.61329	7	2016	Authors	unpublished	Beijing Songshan	323.06	214.58	66.4211	108.48	33.5789	0.505545
Coniferous	115.8	40.5	4.365	7.85714	7.21	9.2	-8.6	22.9	493	2300	1770	25.55	31.2207	37.4532	15.8952	1.76159	7	2016	Authors	unpublished	Beijing Songshan	323.06	214.58	66.4211	108.48	33.5789	0.505545
Coniferous	115.8	40.5	4.383	9.4	5.54	9.2	-8.6	22.9	493	2300	1770	25.49	20.0188	31.0367	15.9551	3.08879	7	2016	Authors	unpublished	Beijing Songshan	323.06	214.58	66.4211	108.48	33.5789	0.505545
Coniferous	115.8	40.5	2.831	8.15714	6.28	9.2	-8.6	22.9	493	2300	1770	25.39	29.2455	41.8966	13.1571	1.9352	7	2016	Authors	unpublished	Beijing Songshan	323.06	214.58	66.4211	108.48	33.5789	0.505545
Coniferous	115.8	40.5	2.831	8.15714	6.28	9.2	-8.6	22.9	493	2300	1770	25.26	19.4319	25.5	18.9569	0.850586	7	2016	Authors	unpublished	Beijing Songshan	323.06	214.58	66.4211	108.48	33.5789	0.505545
Coniferous	115.8	40.5	4.383	9.4	5.54	9.2	-8.6	22.9	493	2300	1770	25.13	80.6489	14.4751	13.3949	0.95	7	2016	Authors	unpublished	Beijing Songshan	323.06	214.58	66.4211	108.48	33.5789	0.505545
Coniferous	115.8	40.5	3.629	6.07143	6.14	9.2	-8.6	22.9	493	2300	1770	24.91	27.5849	36.9691	13.3533	1.30961	7	2016	Authors	unpublished	Beijing Songshan	323.06	214.58	66.4211	108.48	33.5789	0.505545
Coniferous	115.8	40.5	3.731	7.41429	5.72	9.2	-8.6	22.9	493	2300	1770	24.9	10.2	31.2	10	1.1	7	2010	Authors	unpublished	Western Hills of Beijing	323.06	214.58	66.4211	108.48	33.5789	0.505545
Coniferous	115.8	40.5	3.299	9.31429	5.9	9.2	-8.6	22.9	493	2300	1770	24.85	19.8	30.1	17.2	1.65739	6	2019	Authors	unpublished	Guangxi Hengxian Town	323.06	214.58	66.4211	108.48	33.5789	0.505545
Coniferous	115.8	40.5	4.365	7.85714	7.21	9.2	-8.6	22.9	493	2300	1770	24.83	26.6711	44.843	12.9412	1.57947	7	2016	Authors	unpublished	Beijing Songshan	323.06	214.58	66.4211	108.48	33.5789	0.505545
Coniferous	115.8	40.5	4.717	13.5	5.6	9.2	-8.6	22.9	493	2300	1770	24.74	42.8279	30.198	14.1385	1.33124	7	2016	Authors	unpublished	Beijing Songshan	323.06	214.58	66.4211	108.48	33.5789	0.505545
Coniferous	115.8	40.5	4.055	7.27143	5.75	9.2	-8.6	22.9	493	2300	1770	24.71	27.3001	44.4499	15.7267	0.806317	7	2016	Authors	unpublished	Beijing Songshan	323.06	214.58	66.4211	108.48	33.5789	0.505545
Coniferous	115.8	40.5	5.514	11.3429	5.32	9.2	-8.6	22.9	493	2300	1770	24.7	23.8194	41.8199	17.2461	1.34193	7	2016	Authors	unpublished	Beijing Songshan	323.06	214.58	66.4211	108.48	33.5789	0.505545
Coniferous	115.8	40.5	3.629	6.07143	6.14	9.2	-8.6	22.9	493	2300	1770	24.7	27.8184	37.3482	14.0253	1.2468	7	2016	Authors	unpublished	Beijing Songshan	323.06	214.58	66.4211	108.48	33.5789	0.505545
Coniferous	115.8	40.5	6.48	11.0714	6.83	9.2	-8.6	22.9	493	2300	1770	24.63	65.8387	20.6667	12.9493	1.14695	7	2016	Authors	unpublished	Beijing Songshan	323.06	214.58	66.4211	108.48	33.5789	0.505545
Coniferous	115.8	40.5	2.603	5.98571	6.08	9.2	-8.6	22.9	493	2300	1770	24.55	41.5542	31.7739	17.4013	0.932627	7	2016	Authors	unpublished	Beijing Songshan	323.06	214.58	66.4211	108.48	33.5789	0.505545
Coniferous	115.8	40.5	2.908	6.6	5.93	9.2	-8.6	22.9	493	2300	1770	24.22	24.064	43.5725	18.8907	3.1893	7	2016	Authors	unpublished	Beijing Songshan	323.06	214.58	66.4211	108.48	33.5789	0.505545
Coniferous	115.8	40.5	4.365	7.85714	7.21	9.2	-8.6	22.9	493	2300	1770	24.05	32.5405	35.0539	17.3155	1.30132	7	2016	Authors	unpublished	Beijing Songshan	323.06	214.58	66.4211	108.48	33.5789	0.505545
Coniferous	115.8	40.5	3.943	8.84286	5.83	9.2	-8.6	22.9	493	2300	1770	23.88	23.827	48.4501	13.7713	1.08	7	2016	Authors	unpublished	Beijing Songshan	323.06	214.58	66.4211	108.48	33.5789	0.505545
Coniferous	115.8	40.5	3.943	8.84286	5.83	9.2	-8.6	22.9	493	2300	1770	23.6	31.7597	33.5098	14.668	0.904846	7	2016	Authors	unpublished	Beijing Songshan	323.06	214.58	66.4211	108.48	33.5789	0.505545
Coniferous	115.8	40.5	4.329	8.88571	7.57	9.2	-8.6	22.9	493	2300	1770	23.53	19.3785	36.2319	15.9532	0.754819	7	2016	Authors	unpublished	Beijing Songshan	323.06	214.58	66.4211	108.48	33.5789	0.505545
Coniferous	115.8	40.5	3.731	7.41429	5.72	9.2	-8.6	22.9	493	2300	1770	23.36	33.5445	36.409	13.3289	0.857022	7	2016	Authors	unpublished	Beijing Songshan	323.06	214.58	66.4211	108.48	33.5789	0.505545
Coniferous	115.8	40.5	3.532	8.02857	5.94	9.2	-8.6	22.9	493	2300	1770	23.3	29.6809	40.0731	8.76403	1.60328	7	2016	Authors	unpublished	Beijing Songshan	323.06	214.58	66.4211	108.48	33.5789	0.505545
Coniferous	115.8	40.5	3.38	9.9	6.26	9.2	-8.6	22.9	493	2300	1770	23.24	25.3394	33.9598	13.9468	1.12455	7	2016	Authors	unpublished	Beijing Songshan	323.06	214.58	66.4211	108.48	33.5789	0.505545
Coniferous	115.8	40.5	6.165	8.98571	6.03	9.2	-8.6	22.9	493	2300	1770	23.12	17.7473	27.8	11.3788	1.44359	7	2016	Authors	unpublished	Beijing Songshan	323.06	214.58	66.4211	108.48	33.5789	0.505545
Coniferous	115.8	40.5	4.055	7.27143	5.75	9.2	-8.6	22.9	493	2300	1770	23.1	24.6126	23.1	22.2165	1.43958	7	2016	Authors	unpublished	Beijing Songshan	323.06	214.58	66.4211	108.48	33.5789	0.505545
Coniferous	115.8	40.5	2.603	5.98571	6.08	9.2	-8.6	22.9	493	2300	1770	22.84	17.4324	8.22832	9.6806	2.3	7	2016	Authors	unpublished	Beijing Songshan	323.06	214.58	66.4211	108.48	33.5789	0.505545
Coniferous	115.8	40.5	3.918	9.18571	6.03	9.2	-8.6	22.9	493	2300	1770	22.71	35.6007	33.6652	16.8022	2.59026	7	2016	Authors	unpublished	Beijing Songshan	323.06	214.58	66.4211	108.48	33.5789	0.505545
Coniferous	115.8	40.5	3.731	7.41429	5.72	9.2	-8.6	22.9	493	2300	1770	22.6	17.6528	28.3	17.321	0.890596	7	2016	Authors	unpublished	Beijing Songshan	323.06	214.58	66.4211	108.48	33.5789	0.505545
Coniferous	115.8	40.5	2.908	6.6	5.93	9.2	-8.6	22.9	493	2300	1770	22.6	29.584	52.5932	15.792	0.53	7	2016	Authors	unpublished	Beijing Songshan	323.06	214.58	66.4211	108.48	33.5789	0.505545
Coniferous	115.8	40.5	3.991	8.61429	5.68	9.2	-8.6	22.9	493	2300	1770	22.5	24.1679	16.2345	13.9746	1.59628	7	2016	Authors	unpublished	Beijing Songshan	323.06	214.58	66.4211	108.48	33.5789	0.505545
Coniferous	115.8	40.5	3.761	9.5	5.64	9.2	-8.6	22.9	493	2300	1770	22.43	3.7037	47.2	10.2	1.2	9	2007	Authors	unpublished	Mount Tianshan	323.06	214.58	66.4211	108.48	33.5789	0.505545
Coniferous	115.8	40.5	3.991	8.61429	5.68	9.2	-8.6	22.9	493	2300	1770	22.4	18.4133	28.3	14.1579	1.54646	7	2016	Authors	unpublished	Beijing Songshan	323.06	214.58	66.4211	108.48	33.5789	0.505545
Coniferous	115.8	40.5	4.053	6.04286	6	9.2	-8.6	22.9	493	2300	1770	22.38	15.4	34.2	18.18	1.03	6	2019	Authors	unpublished	Guangxi Huashan forest farm	323.06	214.58	66.4211	108.48	33.5789	0.505545
Coniferous	115.8	40.5	3.918	9.18571	6.03	9.2	-8.6	22.9	493	2300	1770	22.36	33.0674	36.8387	10.3536	1.22203	7	2016	Authors	unpublished	Beijing Songshan	323.06	214.58	66.4211	108.48	33.5789	0.505545
Coniferous	115.8	40.5	4.717	13.5	5.6	9.2	-8.6	22.9	493	2300	1770	22.25	35.2281	33.061	12.8693	1.06374	7	2016	Authors	unpublished	Beijing Songshan	323.06	214.58	66.4211	108.48	33.5789	0.505545
Coniferous	115.8	40.5	4.383	9.4	5.54	9.2	-8.6	22.9	493	2300	1770	22.23	25.4408	44.8148	12.2829	1.31369	7	2016	Authors	unpublished	Beijing Songshan	323.06	214.58	66.4211	108.48	33.5789	0.505545
Coniferous	115.8	40.5	3.149	6.07143	5.87	9.2	-8.6	22.9	493	2300	1770	22.19	31.815	43.508	13.6491	1.87623	7	2016	Authors	unpublished	Beijing Songshan	323.06	214.58	66.4211	108.48	33.5789	0.505545
Coniferous	115.8	40.5	3.38	9.9	6.26	9.2	-8.6	22.9	493	2300	1770	22.17	23.7877	38.731	12.6398	2.05001	7	2016	Authors	unpublished	Beijing Songshan	323.06	214.58	66.4211	108.48	33.5789	0.505545
Coniferous	115.8	40.5	6.48	11.0714	6.83	9.2	-8.6	22.9	493	2300	1770	22.13	28.6369	25.2416	16.5284	1.53307	7	2016	Authors	unpublished	Beijing Songshan	323.06	214.58	66.4211	108.48	33.5789	0.505545
Coniferous	115.8	40.5	3.943	8.84286	5.83	9.2	-8.6	22.9	493	2300	1770	22.07	16.8585	32	14.0595	1.22981	7	2016	Authors	unpublished	Beijing Songshan	323.06	214.58	66.4211	108.48	33.5789	0.505545
Coniferous	115.8	40.5	2.603	5.98571	6.08	9.2	-8.6	22.9	493	2300	1770	22.02	32.8096	38.6429	13.6224	1.31684	7	2016	Authors	unpublished	Beijing Songshan	323.06	214.58	66.4211	108.48	33.5789	0.505545
Coniferous	115.8	40.5	3.532	8.02857	5.94	9.2	-8.6	22.9	493	2300	1770	21.98	23.8172	59.5677	15.1179	2.04141	7	2016	Authors	unpublished	Beijing Songshan	323.06	214.58	66.4211	108.48	33.5789	0.505545
Coniferous	115.8	40.5	3.918	9.18571	6.03	9.2	-8.6	22.9	493	2300	1770	21.95	16.3527	23.48	14.8063	0.75	7	2016	Authors	unpublished	Beijing Songshan	323.06	214.58	66.4211	108.48	33.5789	0.505545
Coniferous	115.8	40.5	4.472	10.6429	5.9	9.2	-8.6	22.9	493	2300	1770	21.89	16.5211	23.9965	7.54575	1.1	7	2016	Authors	unpublished	Beijing Songshan	323.06	214.58	66.4211	108.48	33.5789	0.505545
Coniferous	115.8	40.5	2.796	6.55714	5.83	9.2	-8.6	22.9	493	2300	1770	21.74	42.9557	36.5437	18.288	1.73361	7	2016	Authors	unpublished	Beijing Songshan	323.06	214.58	66.4211	108.48	33.5789	0.505545
Coniferous	115.8	40.5	4.365	7.85714	7.21	9.2	-8.6	22.9	493	2300	1770	21.63	36.9528	27.8209	7.17575	0.790894	7	2016	Authors	unpublished	Beijing Songshan	323.06	214.58	66.4211	108.48	33.5789	0.505545
Coniferous	115.8	40.5	3.761	9.5	5.64	9.2	-8.6	22.9	493	2300	1770	21.58	3.84615	44.8	12.1	0.8	9	2007	Authors	unpublished	Mount Tianshan	323.06	214.58	66.4211	108.48	33.5789	0.505545
Coniferous	115.8	40.5	3.731	7.41429	5.72	9.2	-8.6	22.9	493	2300	1770	21.52	64.9168	18.9394	13.2918	2.22801	7	2016	Authors	unpublished	Beijing Songshan	323.06	214.58	66.4211	108.48	33.5789	0.505545
Coniferous	115.8	40.5	3.198	6.75714	7.25	9.2	-8.6	22.9	493	2300	1770	21.37	20.0237	40.7164	14.1155	1.9894	7	2016	Authors	unpublished	Beijing Songshan	323.06	214.58	66.4211	108.48	33.5789	0.505545
Coniferous	115.8	40.5	3.213	8.15714	5.66	9.2	-8.6	22.9	493	2300	1770	21.34	12.79	28	14.5811	1.53552	7	2016	Authors	unpublished	Beijing Songshan	323.06	214.58	66.4211	108.48	33.5789	0.505545
Coniferous	115.8	40.5	1.314	5.37143	6.47	9.2	-8.6	22.9	493	2300	1770	21.34	12.056	44.0065	18.7744	0.942627	7	2016	Authors	unpublished	Beijing Songshan	323.06	214.58	66.4211	108.48	33.5789	0.505545
Coniferous	115.8	40.5	3.943	8.84286	5.83	9.2	-8.6	22.9	493	2300	1770	21.32	3.57143	47.3	10.1	2.1	9	2007	Authors	unpublished	Mount Tianshan	323.06	214.58	66.4211	108.48	33.5789	0.505545
Coniferous	115.8	40.5	2.603	5.98571	6.08	9.2	-8.6	22.9	493	2300	1770	21.19	10.2	42.9	18.9	0.78	7	2017	Authors	unpublished	Fujian Pingtan Island	323.06	214.58	66.4211	108.48	33.5789	0.505545
Coniferous	115.8	40.5	3.943	8.84286	5.83	9.2	-8.6	22.9	493	2300	1770	21.13	35.5286	37.7076	14.8606	1.50951	7	2016	Authors	unpublished	Beijing Songshan	323.06	214.58	66.4211	108.48	33.5789	0.505545
Coniferous	115.8	40.5	3.943	8.84286	5.83	9.2	-8.6	22.9	493	2300	1770	21.13	29.7412	14.701	20.8282	2.14714	7	2016	Authors	unpublished	Beijing Songshan	323.06	214.58	66.4211	108.48	33.5789	0.505545
Coniferous	115.8	40.5	3.918	9.18571	6.03	9.2	-8.6	22.9	493	2300	1770	20.99	34.8246	37.013	14.2138	2.47393	7	2016	Authors	unpublished	Beijing Songshan	323.06	214.58	66.4211	108.48	33.5789	0.505545
Coniferous	115.8	40.5	3.198	6.75714	7.25	9.2	-8.6	22.9	493	2300	1770	20.9	30.0766	37.881	13.4067	1.0605	7	2016	Authors	unpublished	Beijing Songshan	323.06	214.58	66.4211	108.48	33.5789	0.505545
Coniferous	115.8	40.5	3.299	9.31429	5.9	9.2	-8.6	22.9	493	2300	1770	20.83	15.8	35.1	10.9	1.3	6	2019	Authors	unpublished	Guangxi Huashan forest farm	323.06	214.58	66.4211	108.48	33.5789	0.505545
Coniferous	115.8	40.5	6.48	11.0714	6.83	9.2	-8.6	22.9	493	2300	1770	20.58	15.2239	25.8739	15.3371	0.984141	7	2016	Authors	unpublished	Beijing Songshan	323.06	214.58	66.4211	108.48	33.5789	0.505545
Coniferous	115.8	40.5	3.918	9.18571	6.03	9.2	-8.6	22.9	493	2300	1770	20.53	23.5345	38.6399	13.6674	2.21756	7	2016	Authors	unpublished	Beijing Songshan	323.06	214.58	66.4211	108.48	33.5789	0.505545
Coniferous	115.8	40.5	1.314	5.37143	6.47	9.2	-8.6	22.9	493	2300	1770	20.41	13.7119	28.1	15.3537	1.82849	7	2016	Authors	unpublished	Beijing Songshan	323.06	214.58	66.4211	108.48	33.5789	0.505545
Coniferous	115.8	40.5	4.383	9.4	5.54	9.2	-8.6	22.9	493	2300	1770	20.32	3.57143	47.3	11.9	1.2	9	2007	Literatures	Sun et al., 2007	Mount Tianshan	323.06	214.58	66.4211	108.48	33.5789	0.505545
Coniferous	115.8	40.5	3.933	8.14286	7.31	9.2	-8.6	22.9	493	2300	1770	20.31	3.57143	48.3	7.1	1.8	9	2007	Literatures	Sun et al., 2007	Mount Tianshan	323.06	214.58	66.4211	108.48	33.5789	0.505545
Coniferous	115.8	40.5	6.48	11.0714	6.83	9.2	-8.6	22.9	493	2300	1770	20.11	14.9	34.6	10.9	1.1	6	2007	Literatures	Huang et al., 2007	Guangxi Huashan forest farm	323.06	214.58	66.4211	108.48	33.5789	0.505545
Coniferous	115.8	40.5	4.329	8.88571	7.57	9.2	-8.6	22.9	493	2300	1770	20.11	3.44828	47.1	11.4	0.8	9	2007	Literatures	Sun et al., 2007	Mount Tianshan	323.06	214.58	66.4211	108.48	33.5789	0.505545
Coniferous	115.8	40.5	3.299	9.31429	5.9	9.2	-8.6	22.9	493	2300	1770	20.04	3.7037	48.1	12.3	1.3	9	2007	Literatures	Sun et al., 2007	Mount Tianshan	323.06	214.58	66.4211	108.48	33.5789	0.505545
Coniferous	115.8	40.5	2.796	6.55714	5.83	9.2	-8.6	22.9	493	2300	1770	19.87	3.22581	48.5	10.1	2.4	9	2007	Literatures	Sun et al., 2007	Mount Tianshan	323.06	214.58	66.4211	108.48	33.5789	0.505545
Coniferous	115.8	40.5	4.383	9.4	5.54	9.2	-8.6	22.9	493	2300	1770	19.41	3.57143	52.3	7.8	2.3	9	2007	Literatures	Sun et al., 2007	Mount Tianshan	323.06	214.58	66.4211	108.48	33.5789	0.505545
Coniferous	115.8	40.5	3.198	6.75714	7.25	9.2	-8.6	22.9	493	2300	1770	19.38	9.967	56.06	14.06	1.48	8	2017	Literatures	Ma et al., 2017	Shanxi Luliang	323.06	214.58	66.4211	108.48	33.5789	0.505545
Coniferous	115.8	40.5	3.629	6.07143	6.14	9.2	-8.6	22.9	493	2300	1770	19.37	10.3	48.2	11.4	0.95	5	2018	Literatures	Li et al., 2018	Guizhou Bijie	323.06	214.58	66.4211	108.48	33.5789	0.505545
Coniferous	115.8	40.5	3.419	8.44286	6.05	9.2	-8.6	22.9	493	2300	1770	19.26	12.15	50.89	14.25	1.53	8	2017	Literatures	Ma et al., 2017	Shanxi Luliang	323.06	214.58	66.4211	108.48	33.5789	0.505545
Coniferous	115.8	40.5	3.198	6.75714	7.25	9.2	-8.6	22.9	493	2300	1770	19.25	23.3978	28.1	28.9661	1.52575	7	2018	Literatures	Ren et al., 2018	Yakushi forest area	323.06	214.58	66.4211	108.48	33.5789	0.505545
Coniferous	115.8	40.5	3.213	8.15714	5.66	9.2	-8.6	22.9	493	2300	1770	19.02	34.27	49.21	14.13	1.11	7	2012	Literatures	Xia et al., 2012	Jiaohe	323.06	214.58	66.4211	108.48	33.5789	0.505545
Coniferous	115.8	40.5	4.717	13.5	5.6	9.2	-8.6	22.9	493	2300	1770	18.8	15.0245	34.1107	15.7	1.04496	7	2014	Literatures	Yang et al., 2014	Mohe	323.06	214.58	66.4211	108.48	33.5789	0.505545
Coniferous	115.8	40.5	3.943	8.84286	5.83	9.2	-8.6	22.9	493	2300	1770	18.65	13.4458	43.4167	13	0.966846	7	2014	Literatures	Yang et al., 2014	Mohe	323.06	214.58	66.4211	108.48	33.5789	0.505545
Coniferous	115.8	40.5	4.329	8.88571	7.57	9.2	-8.6	22.9	493	2300	1770	18.53	21.9914	31.02	22.335	1.76633	7	2018	Literatures	Ren et al., 2018	Yakushi forest area	323.06	214.58	66.4211	108.48	33.5789	0.505545
Coniferous	115.8	40.5	1.314	5.37143	6.47	9.2	-8.6	22.9	493	2300	1770	18.23	8.662	49.64	14.45	1.58	8	2017	Literatures	Ma et al., 2017	Shanxi Luliang	323.06	214.58	66.4211	108.48	33.5789	0.505545
Coniferous	115.8	40.5	4.717	13.5	5.6	9.2	-8.6	22.9	493	2300	1770	18.15	25.31	49.01	15.56	1.31	7	2012	Literatures	Xia et al., 2012	Jiaohe	323.06	214.58	66.4211	108.48	33.5789	0.505545
Coniferous	115.8	40.5	3.532	8.02857	5.94	9.2	-8.6	22.9	493	2300	1770	18.03	10.5	48.4	11.6	0.99	5	2018	Literatures	Li et al., 2018	Guizhou Bijie	323.06	214.58	66.4211	108.48	33.5789	0.505545
Coniferous	115.8	40.5	3.198	6.75714	7.25	9.2	-8.6	22.9	493	2300	1770	17.87	31.78	49.63	14.68	1.1	7	2012	Literatures	Xia et al., 2012	Jiaohe	323.06	214.58	66.4211	108.48	33.5789	0.505545
Coniferous	115.8	40.5	2.603	5.98571	6.08	9.2	-8.6	22.9	493	2300	1770	17.75	10.7	47.9	10.9	0.85	5	2018	Literatures	Li et al., 2018	Guizhou Bijie	323.06	214.58	66.4211	108.48	33.5789	0.505545
Coniferous	115.8	40.5	3.933	8.14286	7.31	9.2	-8.6	22.9	493	2300	1770	17.72	16.1	48.25	13.14	1.72	8	2017	Literatures	Ma et al., 2017	Shanxi Luliang	323.06	214.58	66.4211	108.48	33.5789	0.505545
Broadleaved	116.46	39.9	1.98033	9.24798	6.10382	12.1	-5	26	644	2200	1325	89.88	16.2	34	15	0.99	9	2014	Literatures	Li et al., 2014	Beijing	346.97	255.777	73.7173	91.1931	26.2827	0.356534
Broadleaved	116.46	39.9	1.98033	9.24798	6.10382	12.1	-5	26	644	2200	1325	79.33	13.8	32.8	17.2	0.9	9	2014	Literatures	Li et al., 2014	Beijing	346.97	255.777	73.7173	91.1931	26.2827	0.356534
Broadleaved	116.46	39.9	1.98033	9.24798	6.10382	12.1	-5	26	644	2200	1325	83.61	14.2	34.8	19.5	0.94	9	2014	Literatures	Li et al., 2014	Beijing	346.97	255.777	73.7173	91.1931	26.2827	0.356534
Broadleaved	116.46	39.9	1.98033	9.24798	6.10382	12.1	-5	26	644	2200	1325	72.27	14.5	35.1	19.5	0.68	9	2014	Literatures	Li et al., 2014	Beijing	346.97	255.777	73.7173	91.1931	26.2827	0.356534
Broadleaved	102.9	38.6	1.7	0.12	8.42	7.7	-2.5	23.1	115.2	2700	1057	2.8	37	15.35	26.01	1.21	7	2018	Literatures	Wang et al., 2018	Badain Jaran Desert	196.05	77.2514	39.404	118.799	60.596	1.53782
Broadleaved	102.9	38.6	0.5	0.65	9.04	7.7	-2.5	23.1	115.2	2700	1057	21	29	17.33	38.21	1.59	7	2018	Literatures	Wang et al., 2018	Badain Jaran Desert	196.05	77.2514	39.404	118.799	60.596	1.53782
Broadleaved	102.9	38.6	0.4	0.6	9.03	7.7	-2.5	23.1	115.2	2700	1057	17.7	27	17.4	36.33	1.42	7	2018	Literatures	Wang et al., 2018	Badain Jaran Desert	196.05	77.2514	39.404	118.799	60.596	1.53782
Broadleaved	102.9	38.6	0.3	0.9	8.86	7.7	-2.5	23.1	115.2	2700	1057	2.8	30	15.12	37.28	1.67	7	2018	Literatures	Wang et al., 2018	Badain Jaran Desert	196.05	77.2514	39.404	118.799	60.596	1.53782
Broadleaved	102.9	38.6	1.7	0.12	8.42	7.7	-2.5	23.1	115.2	2700	1057	17.7	37.1	15.97	26.79	1.24	7	2018	Literatures	Wang et al., 2018	Badain Jaran Desert	196.05	77.2514	39.404	118.799	60.596	1.53782
Broadleaved	102.9	38.6	0.5	0.65	9.04	7.7	-2.5	23.1	115.2	2700	1057	21	29.2	18.07	39.97	1.62	7	2018	Literatures	Wang et al., 2018	Badain Jaran Desert	196.05	77.2514	39.404	118.799	60.596	1.53782
Broadleaved	102.9	38.6	0.4	0.6	9.03	7.7	-2.5	23.1	115.2	2700	1057	21	27.2	17.87	38.46	1.46	7	2018	Literatures	Wang et al., 2018	Badain Jaran Desert	196.05	77.2514	39.404	118.799	60.596	1.53782
Broadleaved	102.9	38.6	0.3	0.9	8.86	7.7	-2.5	23.1	115.2	2700	1057	2.8	30.3	15.8	40.25	1.83	7	2018	Literatures	Wang et al., 2018	Badain Jaran Desert	196.05	77.2514	39.404	118.799	60.596	1.53782
Broadleaved	102.9	38.6	1.7	0.12	8.42	7.7	-2.5	23.1	115.2	2700	1057	21	36.9	14.73	25.43	1.18	7	2018	Literatures	Wang et al., 2018	Badain Jaran Desert	196.05	77.2514	39.404	118.799	60.596	1.53782
Broadleaved	102.9	38.6	0.5	0.65	9.04	7.7	-2.5	23.1	115.2	2700	1057	43	28.8	16.69	36.55	1.56	7	2018	Literatures	Wang et al., 2018	Badain Jaran Desert	196.05	77.2514	39.404	118.799	60.596	1.53782
Broadleaved	102.9	38.6	0.4	0.6	9.03	7.7	-2.5	23.1	115.2	2700	1057	21	26.8	16.93	34.2	1.38	7	2018	Literatures	Wang et al., 2018	Badain Jaran Desert	196.05	77.2514	39.404	118.799	60.596	1.53782
Broadleaved	102.9	38.6	0.3	0.9	8.86	7.7	-2.5	23.1	115.2	2700	1057	2.8	29.7	14.47	34.23	1.51	7	2018	Literatures	Wang et al., 2018	Badain Jaran Desert	196.05	77.2514	39.404	118.799	60.596	1.53782
Broadleaved	102.9	38.5	0.8	0.2	9.05	7.7	-2.5	23.1	115.2	2700	1057	43	25	16.4	40.58	1.64	7	2018	Literatures	Wang et al., 2018	Badain Jaran Desert	199.45	77.5988	38.9064	121.851	61.0936	1.57027
Broadleaved	102.8	38.5	0.4	0.6	9.17	7.7	-2.5	23.1	115.2	2700	1057	2.8	20	17.67	32.61	1.47	7	2018	Literatures	Wang et al., 2018	Badain Jaran Desert	255.61	97.1717	38.0156	158.438	61.9844	1.6305
Broadleaved	102.9	38.5	0.8	0.6	9.05	7.7	-2.5	23.1	115.2	2700	1057	2.8	25.3	16.97	43.48	1.75	7	2018	Literatures	Wang et al., 2018	Badain Jaran Desert	199.45	77.5988	38.9064	121.851	61.0936	1.57027
Broadleaved	102.8	38.5	0.4	0.6	9.17	7.7	-2.5	23.1	115.2	2700	1057	17.7	20.1	18.44	35.87	1.66	7	2018	Literatures	Wang et al., 2018	Badain Jaran Desert	255.61	97.1717	38.0156	158.438	61.9844	1.6305
Broadleaved	102.9	38.5	0.8	0.2	9.05	7.7	-2.5	23.1	115.2	2700	1057	2.8	24.7	15.83	37.78	1.53	7	2018	Literatures	Wang et al., 2018	Badain Jaran Desert	199.45	77.5988	38.9064	121.851	61.0936	1.57027
Broadleaved	102.8	38.5	0.4	0.6	9.17	7.7	-2.5	23.1	115.2	2700	1057	2.8	19.9	16.9	29.54	1.28	7	2018	Literatures	Wang et al., 2018	Badain Jaran Desert	255.61	97.1717	38.0156	158.438	61.9844	1.6305
Broadleaved	109.33	36.87	2.43324	9.16462	6.34732	8.8	-3.2	29.5	505.3	2253.11	1500	6.6	13	17.33	10.8	1.05	7	2014	Literatures	Xiong et al., 2014	Shaanxi Yanan	273.77	152.973	55.8763	120.797	44.1237	0.789668
Broadleaved	109.351	36.85	2.41009	9.20521	6.3412	8.8	-3.2	29.5	505.3	2250.17	1500	10.5	19	17.33	13.5	1.6	7	2014	Literatures	Xiong et al., 2014	Shaanxi Yanan	267.6	149.525	55.8763	118.075	44.1237	0.789668
Broadleaved	109.31	36.85	2.26897	9.40021	6.33213	8.8	-3.2	29.5	505.3	2241.12	1500	8	16	15.97	11.5	1.3	7	2014	Literatures	Xiong et al., 2014	Shaanxi Yanan	270.4	151.089	55.8763	119.311	44.1237	0.789668
Broadleaved	109.6	36.83	2.41916	9.21581	6.31965	8.8	-5.7	18.9	500	2244.82	1500	70.39	8.38	54.7896	27.63	1.92	8	2014	Literatures	Xu et al., 2014	Shaanxi Ansai	276.2	161.644	58.5241	114.556	41.4759	0.708697
Broadleaved	109.6	36.83	2.43986	9.18681	6.32146	8.8	-5.7	18.9	500	2246.27	1500	120	5.57	63	21.35	1.36	8	2014	Literatures	Xu et al., 2014	Shaanxi Ansai	276.2	161.644	58.5241	114.556	41.4759	0.708697
Broadleaved	109.6	36.83	2.42558	9.20681	6.32021	8.8	-5.7	18.9	500	2245.27	1500	90	8.28	44	26.78	1.87	8	2014	Literatures	Xu et al., 2014	Shaanxi Ansai	276.2	161.644	58.5241	114.556	41.4759	0.708697
Broadleaved	109.6	36.83	2.42772	9.20381	6.3204	8.8	-5.7	18.9	500	2245.42	1500	60	5.62	66.7712	22.34	1.41	8	2014	Literatures	Xu et al., 2014	Shaanxi Ansai	276.2	161.644	58.5241	114.556	41.4759	0.708697
Broadleaved	109.25	36.73	2.28113	9.41978	6.32347	8.8	-3.2	29.5	505.3	2237.86	1500	6.3	16	15.97	11.2	1.2	7	2014	Literatures	Xiong et al., 2014	Shaanxi Yanan	316.89	175.854	55.4936	141.036	44.5064	0.802011
Broadleaved	109.35	36.66	2.40369	9.27837	6.31773	8.8	-3.2	29.5	505.3	2241.29	1500	7	18	16.69	12.3	1.4	7	2014	Literatures	Xiong et al., 2014	Shaanxi Yanan	301.67	184.093	61.0246	117.577	38.9754	0.638684
Coniferous	115.8	40.5	3.918	9.18571	6.03	9.2	-8.6	22.9	493	2300	1770	17.71	15	53	7.5	0.4	8	2010	Literatures	Li et al., 2010	ziwu mountain	323.06	214.58	66.4211	108.48	33.5789	0.505545
Coniferous	115.8	40.5	3.149	6.07143	5.87	9.2	-8.6	22.9	493	2300	1770	17.6	15	53	7.5	0.4	8	2010	Literatures	Li et al., 2010	ziwu mountain	323.06	214.58	66.4211	108.48	33.5789	0.505545
Coniferous	115.8	40.5	2.908	6.6	5.93	9.2	-8.6	22.9	493	2300	1770	17.44	15	53	7.5	0.4	8	2010	Literatures	Li et al., 2010	ziwu mountain	323.06	214.58	66.4211	108.48	33.5789	0.505545
Coniferous	115.8	40.5	3.213	8.15714	5.66	9.2	-8.6	22.9	493	2300	1770	17.22	2.658	45.45	27.57	1.1	6	2018	Literatures	Liang et al., 2018	Lanzhou	123.06	81.7378	66.4211	41.3222	33.5789	0.505545
Coniferous	115.8	40.5	2.831	8.15714	6.28	9.2	-8.6	22.9	493	2300	1770	16.93	9.5	46.38	13.92	1.91	8	2017	Literatures	Ma et al., 2017	Shanxi Luliang	323.06	214.58	66.4211	108.48	33.5789	0.505545
Coniferous	115.8	40.5	4.329	8.88571	7.57	9.2	-8.6	22.9	493	2300	1770	16.9	15.29	50	27.17	2.3	6	2018	Literatures	Liang et al., 2018	Lanzhou	123.06	81.7378	66.4211	41.3222	33.5789	0.505545
Coniferous	115.8	40.5	3.991	8.61429	5.68	9.2	-8.6	22.9	493	2300	1770	16.87	5.83389	37.5	22.92	2.3	6	2018	Literatures	Liang et al., 2018	Lanzhou	123.06	81.7378	66.4211	41.3222	33.5789	0.505545
Coniferous	115.8	40.5	4.055	7.27143	5.75	9.2	-8.6	22.9	493	2300	1770	16.36	3.23806	52.17	23.8	1.66	6	2018	Literatures	Liang et al., 2018	Lanzhou	123.06	81.7378	66.4211	41.3222	33.5789	0.505545
Coniferous	115.8	40.5	3.299	9.31429	5.9	9.2	-8.6	22.9	493	2300	1770	16.13	16.94	25	27.57	1.63	6	2018	Literatures	Liang et al., 2018	Lanzhou	123.06	81.7378	66.4211	41.3222	33.5789	0.505545
Coniferous	115.8	40.5	3.299	9.31429	5.9	9.2	-8.6	22.9	493	2300	1770	16.09	5	41.8199	15	1.5	7	2013	Literatures	Peng et al., 2013	Gongga Mountain	323.06	214.58	66.4211	108.48	33.5789	0.505545
Coniferous	115.8	40.5	3.933	8.14286	7.31	9.2	-8.6	22.9	493	2300	1770	15.88	14.5636	36.2449	13.3	0.913234	7	2014	Literatures	Yang et al., 2014	Mohe	323.06	214.58	66.4211	108.48	33.5789	0.505545
Coniferous	115.8	40.5	2.908	6.6	5.93	9.2	-8.6	22.9	493	2300	1770	15.7	2.895	50	21.35	1.83875	6	2018	Literatures	Liang et al., 2018	Lanzhou	123.06	81.7378	66.4211	41.3222	33.5789	0.505545
Coniferous	115.8	40.5	3.933	8.14286	7.31	9.2	-8.6	22.9	493	2300	1770	15.61	3.51952	50	27.17	1.66	6	2018	Literatures	Liang et al., 2018	Lanzhou	123.06	81.7378	66.4211	41.3222	33.5789	0.505545
Broadleaved	103.4	36.03	2.26	9.29761	6.70503	10.3	-2.3	23.2	327	2324.89	2589	7.9317	17.626	32.61	27.17	1.63	6	2018	Literatures	Liang et al., 2018	Lanzhou	189.06	84.2112	44.542	104.849	55.458	1.24507
Broadleaved	103.4	36.03	2.26	9.29761	6.70503	10.3	-2.3	23.2	327	2324.89	2589	2.3533	18.1023	33.33	21.35	1.1	6	2018	Literatures	Liang et al., 2018	Lanzhou	189.06	84.2112	44.542	104.849	55.458	1.24507
Broadleaved	103.4	36.03	2.26	9.29761	6.70503	10.3	-2.3	23.2	327	2324.89	2589	1.8533	6.39069	42.65	22.92	1.66	6	2018	Literatures	Liang et al., 2018	Lanzhou	189.06	84.2112	44.542	104.849	55.458	1.24507
Broadleaved	103.4	36.03	2.26	9.29761	6.70503	10.3	-2.3	23.2	327	2324.89	2589	11.12	7.31579	40.97	27.57	2.3	6	2018	Literatures	Liang et al., 2018	Lanzhou	189.06	84.2112	44.542	104.849	55.458	1.24507
Broadleaved	103.4	36.03	2.26	9.29761	6.70503	10.3	-2.3	23.2	327	2324.89	2589	14.2	17.1084	57.24	21.35	1.66	6	2018	Literatures	Liang et al., 2018	Lanzhou	189.06	84.2112	44.542	104.849	55.458	1.24507
Broadleaved	103.4	36.03	2.26	9.29761	6.70503	10.3	-2.3	23.2	327	2324.89	2589	20.7467	13.924	29.62	25.43	1.66	6	2018	Literatures	Liang et al., 2018	Lanzhou	189.06	84.2112	44.542	104.849	55.458	1.24507
Broadleaved	103.4	36.03	2.26	9.29761	6.70503	10.3	-2.3	23.2	327	2324.89	2589	33.64	11.7622	30.01	27.57	1.83875	6	2018	Literatures	Liang et al., 2018	Lanzhou	189.06	84.2112	44.542	104.849	55.458	1.24507
Broadleaved	103.4	36.03	2.26	9.29761	6.70503	10.3	-2.3	23.2	327	2324.89	2589	8.8667	16.4198	33.33	22.92	1.1	6	2018	Literatures	Liang et al., 2018	Lanzhou	189.06	84.2112	44.542	104.849	55.458	1.24507
Broadleaved	103.4	36.03	2.26	9.29761	6.70503	10.3	-2.3	23.2	327	2324.89	2589	0.7333	14.666	55.56	27.17	1.83875	6	2018	Literatures	Liang et al., 2018	Lanzhou	189.06	84.2112	44.542	104.849	55.458	1.24507
Broadleaved	103.4	36.03	2.26	9.29761	6.70503	10.3	-2.3	23.2	327	2324.89	2589	32.75	13.4726	33.51	22.92	1.83875	6	2018	Literatures	Liang et al., 2018	Lanzhou	189.06	84.2112	44.542	104.849	55.458	1.24507
Broadleaved	103.4	36.03	2.26	9.29761	6.70503	10.3	-2.3	23.2	327	2324.89	2589	82.8733	17.0521	29.05	23.8	1.1	6	2018	Literatures	Liang et al., 2018	Lanzhou	189.06	84.2112	44.542	104.849	55.458	1.24507
Broadleaved	103.4	36.03	2.26	9.29761	6.70503	10.3	-2.3	23.2	327	2324.89	2589	10.9067	11.7276	41.15	21.35	2.3	6	2018	Literatures	Liang et al., 2018	Lanzhou	189.06	84.2112	44.542	104.849	55.458	1.24507
Broadleaved	103.4	36.03	2.26	9.29761	6.70503	10.3	-2.3	23.2	327	2324.89	2589	25.7133	12.303	44	22.92	1.1	6	2018	Literatures	Liang et al., 2018	Lanzhou	189.06	84.2112	44.542	104.849	55.458	1.24507
Broadleaved	103.4	36.03	2.26	9.29761	6.70503	10.3	-2.3	23.2	327	2324.89	2589	29.8667	17.3644	33.2	23.8	1.83875	6	2018	Literatures	Liang et al., 2018	Lanzhou	189.06	84.2112	44.542	104.849	55.458	1.24507
Broadleaved	103.4	36.03	2.26	9.29761	6.70503	10.3	-2.3	23.2	327	2324.89	2589	44.34	12.8522	38.46	23.8	1.1	6	2018	Literatures	Liang et al., 2018	Lanzhou	189.06	84.2112	44.542	104.849	55.458	1.24507
Broadleaved	103.4	36.03	2.26	9.29761	6.70503	10.3	-2.3	23.2	327	2324.89	2589	9.4467	11.6626	39.32	21.35	1.83875	6	2018	Literatures	Liang et al., 2018	Lanzhou	189.06	84.2112	44.542	104.849	55.458	1.24507
Broadleaved	103.4	36.03	2.26	9.29761	6.70503	10.3	-2.3	23.2	327	2324.89	2589	26.99	18.784	32.8	27.17	1.1	6	2018	Literatures	Liang et al., 2018	Lanzhou	189.06	84.2112	44.542	104.849	55.458	1.24507
Broadleaved	103.4	36.03	2.26	9.29761	6.70503	10.3	-2.3	23.2	327	2324.89	2589	15.8133	13.6322	44.11	27.57	1.83875	6	2018	Literatures	Liang et al., 2018	Lanzhou	189.06	84.2112	44.542	104.849	55.458	1.24507
Broadleaved	103.4	36.03	2.26	9.29761	6.70503	10.3	-2.3	23.2	327	2324.89	2589	26.28	14.8826	39.97	23.8	1.66	6	2018	Literatures	Liang et al., 2018	Lanzhou	189.06	84.2112	44.542	104.849	55.458	1.24507
Broadleaved	103.4	36.03	2.26	9.29761	6.70503	10.3	-2.3	23.2	327	2324.89	2589	159.607	19.4642	38.88	26.79	1.63	6	2018	Literatures	Liang et al., 2018	Lanzhou	189.06	84.2112	44.542	104.849	55.458	1.24507
Broadleaved	103.4	36.03	2.26	9.29761	6.70503	10.3	-2.3	23.2	327	2324.89	2589	18.3267	10.1815	49.05	27.17	1.83875	6	2018	Literatures	Liang et al., 2018	Lanzhou	189.06	84.2112	44.542	104.849	55.458	1.24507
Broadleaved	103.4	36.03	2.26	9.29761	6.70503	10.3	-2.3	23.2	327	2324.89	2589	68.7267	10.273	42.58	27.57	1.66	6	2018	Literatures	Liang et al., 2018	Lanzhou	189.06	84.2112	44.542	104.849	55.458	1.24507
Broadleaved	103.4	36.03	2.26	9.29761	6.70503	10.3	-2.3	23.2	327	2324.89	2589	18.5467	28.9792	34.78	27.17	1.66	6	2018	Literatures	Liang et al., 2018	Lanzhou	189.06	84.2112	44.542	104.849	55.458	1.24507
Broadleaved	103.4	36.03	2.26	9.29761	6.70503	10.3	-2.3	23.2	327	2324.89	2589	14.6267	17.8374	32.28	27.17	1.1	6	2018	Literatures	Liang et al., 2018	Lanzhou	189.06	84.2112	44.542	104.849	55.458	1.24507
Broadleaved	103.4	36.03	2.26	9.29761	6.70503	10.3	-2.3	23.2	327	2324.89	2589	4.48	13.1765	36.56	23.8	1.1	6	2018	Literatures	Liang et al., 2018	Lanzhou	189.06	84.2112	44.542	104.849	55.458	1.24507
Broadleaved	103.4	36.03	2.26	9.29761	6.70503	10.3	-2.3	23.2	327	2324.89	2589	15.52	16.5106	53.71	27.57	1.1	6	2018	Literatures	Liang et al., 2018	Lanzhou	189.06	84.2112	44.542	104.849	55.458	1.24507
Broadleaved	103.4	36.03	2.26	9.29761	6.70503	10.3	-2.3	23.2	327	2324.89	2589	68.7333	13.4771	36.88	21.35	1.83875	6	2018	Literatures	Liang et al., 2018	Lanzhou	189.06	84.2112	44.542	104.849	55.458	1.24507
Broadleaved	103.4	36.03	2.26	9.29761	6.70503	10.3	-2.3	23.2	327	2324.89	2589	30.82	19.6306	40.46	21.35	0.665935	6	2018	Literatures	Liang et al., 2018	Lanzhou	189.06	84.2112	44.542	104.849	55.458	1.24507
Broadleaved	103.4	36.03	2.26	9.29761	6.70503	10.3	-2.3	23.2	327	2324.89	2589	40.6067	17.2795	36.49	27.17	1.1	6	2018	Literatures	Liang et al., 2018	Lanzhou	189.06	84.2112	44.542	104.849	55.458	1.24507
Broadleaved	103.4	36.03	2.26	9.29761	6.70503	10.3	-2.3	23.2	327	2324.89	2589	2.9933	11.9732	67.57	27.17	1.63	6	2018	Literatures	Liang et al., 2018	Lanzhou	189.06	84.2112	44.542	104.849	55.458	1.24507
Broadleaved	103.4	36.03	2.26	9.29761	6.70503	10.3	-2.3	23.2	327	2324.89	2589	84.3867	11.7367	43.16	27.57	1.63	6	2018	Literatures	Liang et al., 2018	Lanzhou	189.06	84.2112	44.542	104.849	55.458	1.24507
Broadleaved	103.4	36.03	2.26	9.29761	6.70503	10.3	-2.3	23.2	327	2324.89	2589	24.8067	14.0947	57.52	27.17	1.66	6	2018	Literatures	Liang et al., 2018	Lanzhou	189.06	84.2112	44.542	104.849	55.458	1.24507
Broadleaved	103.4	36.03	2.26	9.29761	6.70503	10.3	-2.3	23.2	327	2324.89	2589	52.2867	16.4942	43.37	21.35	0.665935	6	2018	Literatures	Liang et al., 2018	Lanzhou	189.06	84.2112	44.542	104.849	55.458	1.24507
Broadleaved	103.4	36.03	2.26	9.29761	6.70503	10.3	-2.3	23.2	327	2324.89	2589	33.9133	14.6178	54.33	21.35	1.1	6	2018	Literatures	Liang et al., 2018	Lanzhou	189.06	84.2112	44.542	104.849	55.458	1.24507
Broadleaved	103.4	36.03	2.26	9.29761	6.70503	10.3	-2.3	23.2	327	2324.89	2589	16.52	18.5618	35.46	22.92	0.665935	6	2018	Literatures	Liang et al., 2018	Lanzhou	189.06	84.2112	44.542	104.849	55.458	1.24507
Broadleaved	103.4	36.03	2.26	9.29761	6.70503	10.3	-2.3	23.2	327	2324.89	2589	37.5733	12.5244	49.92	23.8	1.83875	6	2018	Literatures	Liang et al., 2018	Lanzhou	189.06	84.2112	44.542	104.849	55.458	1.24507
Broadleaved	103.4	36.03	2.26	9.29761	6.70503	10.3	-2.3	23.2	327	2324.89	2589	9.0533	27.4342	48.53	23.8	2.3	6	2018	Literatures	Liang et al., 2018	Lanzhou	189.06	84.2112	44.542	104.849	55.458	1.24507
Broadleaved	103.4	36.03	2.26	9.29761	6.70503	10.3	-2.3	23.2	327	2324.89	2589	49.7133	25.6254	36.06	27.17	1.83875	6	2018	Literatures	Liang et al., 2018	Lanzhou	189.06	84.2112	44.542	104.849	55.458	1.24507
Broadleaved	103.4	36.03	2.26	9.29761	6.70503	10.3	-2.3	23.2	327	2324.89	2589	40.0133	10.4747	36.42	27.17	1.1	6	2018	Literatures	Liang et al., 2018	Lanzhou	189.06	84.2112	44.542	104.849	55.458	1.24507
Broadleaved	103.4	36.03	2.26	9.29761	6.70503	10.3	-2.3	23.2	327	2324.89	2589	24.7867	12.3317	41.96	22.92	1.66	6	2018	Literatures	Liang et al., 2018	Lanzhou	189.06	84.2112	44.542	104.849	55.458	1.24507
Broadleaved	103.4	36.03	2.26	9.29761	6.70503	10.3	-2.3	23.2	327	2324.89	2589	80.1733	12.1659	41.55	25.43	0.71	6	2018	Literatures	Liang et al., 2018	Lanzhou	189.06	84.2112	44.542	104.849	55.458	1.24507
Broadleaved	103.4	36.03	2.26	9.29761	6.70503	10.3	-2.3	23.2	327	2324.89	2589	14.3667	16.5134	39.55	21.35	0.665935	6	2018	Literatures	Liang et al., 2018	Lanzhou	189.06	84.2112	44.542	104.849	55.458	1.24507
Broadleaved	103.4	36.03	2.26	9.29761	6.70503	10.3	-2.3	23.2	327	2324.89	2589	6.84	22.0645	40.79	22.92	1.83875	6	2018	Literatures	Liang et al., 2018	Lanzhou	189.06	84.2112	44.542	104.849	55.458	1.24507
Broadleaved	103.4	36.03	2.26	9.29761	6.70503	10.3	-2.3	23.2	327	2324.89	2589	9.5267	12.0591	48.17	23.8	1.1	6	2018	Literatures	Liang et al., 2018	Lanzhou	189.06	84.2112	44.542	104.849	55.458	1.24507
Broadleaved	103.4	36.03	2.26	9.29761	6.70503	10.3	-2.3	23.2	327	2324.89	2589	20.5933	15.0316	38.59	27.17	1.83875	6	2018	Literatures	Liang et al., 2018	Lanzhou	189.06	84.2112	44.542	104.849	55.458	1.24507
Broadleaved	103.4	36.03	2.26	9.29761	6.70503	10.3	-2.3	23.2	327	2324.89	2589	16.42	16.7551	38.89	27.57	1.63	6	2018	Literatures	Liang et al., 2018	Lanzhou	189.06	84.2112	44.542	104.849	55.458	1.24507
Broadleaved	103.4	36.03	2.26	9.29761	6.70503	10.3	-2.3	23.2	327	2324.89	2589	23.4933	19.7423	39.93	21.35	2.3	6	2018	Literatures	Liang et al., 2018	Lanzhou	189.06	84.2112	44.542	104.849	55.458	1.24507
Broadleaved	105.04	36.03	2.71243	8.77261	6.61338	7.9	-3.1	20.8	315	2323.05	1800	20.4	18.37	24	19.5	2.5851	8	2017	Literatures	Wang et al., 2017	Huining	305.96	130.439	42.6325	175.521	57.3675	1.34563
Broadleaved	105.04	36.03	2.71243	8.77261	6.61338	7.9	-3.1	20.8	315	2323.05	1800	20.83	16.81	27	11.1	1.83144	8	2017	Literatures	Wang et al., 2017	Huining	305.96	130.439	42.6325	175.521	57.3675	1.34563
Broadleaved	105.04	36.03	2.71243	8.77261	6.61338	7.9	-3.1	20.8	315	2323.05	1800	20.39	18.4	25.1	32	1.51	8	2017	Literatures	Wang et al., 2017	Huining	305.96	130.439	42.6325	175.521	57.3675	1.34563
Broadleaved	105.04	36.03	2.71243	8.77261	6.61338	7.9	-3.1	20.8	315	2323.05	1800	20.34	17.08	26.1	11.1	1.12455	8	2017	Literatures	Wang et al., 2017	Huining	305.96	130.439	42.6325	175.521	57.3675	1.34563
Broadleaved	105.04	36.03	2.71243	8.77261	6.61338	7.9	-3.1	20.8	315	2323.05	1800	21.14	17.8	24.1	18.2226	1.66025	8	2017	Literatures	Wang et al., 2017	Huining	305.96	130.439	42.6325	175.521	57.3675	1.34563
Broadleaved	116.6	30.5	0.11	1.2	4.85	15.4	3.2	22.4	1436	1916.6	917.4	0.7391	42.7583	33.9598	10.9	1.04	7	2016	Literatures	Zhang et al., 2016	Anqing	412.14	333.66	80.958	78.4799	19.042	0.235209
Broadleaved	116.6	30.5	0.11	1.2	4.85	15.4	3.2	22.4	1436	1916.6	917.4	31.66	29	52.17	11.1	1.07	7	2016	Literatures	Zhang et al., 2016	Anqing	412.14	333.66	80.958	78.4799	19.042	0.235209
Broadleaved	120.16	30.18	1.81113	13.0181	4.61677	16.4	6.4	31.4	1628	1690.59	1846.5	18.29	12.04	16.69	18.18	0.72	7	2013	Literatures	Xie et al., 2013	Zhejiang Agricultural and Forestry Botanical Garden	434.6	343.764	79.099	90.8356	20.901	0.264238
Broadleaved	120.16	30.18	1.81113	13.0181	4.61677	16.4	6.4	31.4	1628	1690.59	1846.5	10.65	14.86	15.35	8.626	0.58	7	2013	Literatures	Xie et al., 2013	Zhejiang Agricultural and Forestry Botanical Garden	434.6	343.764	79.099	90.8356	20.901	0.264238
Broadleaved	120.16	30.18	1.81113	13.0181	4.61677	16.4	6.4	31.4	1628	1690.59	1846.5	12.62	10.37	15.97	11.748	0.63	7	2013	Literatures	Xie et al., 2013	Zhejiang Agricultural and Forestry Botanical Garden	434.6	343.764	79.099	90.8356	20.901	0.264238
Broadleaved	120.16	30.18	1.81113	13.0181	4.61677	16.4	6.4	31.4	1628	1690.59	1846.5	15.25	14.11	15.97	18.18	0.58	7	2013	Literatures	Xie et al., 2013	Zhejiang Agricultural and Forestry Botanical Garden	434.6	343.764	79.099	90.8356	20.901	0.264238
Broadleaved	120.16	30.18	1.81113	13.0181	4.61677	16.4	6.4	31.4	1628	1690.59	1846.5	72.73	7.12	15.97	10.9	1.1	7	2013	Literatures	Xie et al., 2013	Zhejiang Agricultural and Forestry Botanical Garden	434.6	343.764	79.099	90.8356	20.901	0.264238
Broadleaved	106.429	29.822	1.32667	12.9061	5.62978	13.6	2.3	20.8	1143	1921.54	874	26.98	18.5	34	23.8	1.66	7	2010	Literatures	Luo et al., 2010	Southwest University	321.15	216.775	67.4996	104.375	32.5004	0.481491
Broadleaved	119.4	29.8	1.76541	13.1602	4.6276	18.4	4.3	28.4	1378.5	1686.03	1534.2	72.27	11.61	31.5646	17.84	1.64	8	2011	Literatures	Xie et al., 2011	Zhejiang A & F University	390.48	309.489	79.2585	80.9912	20.7415	0.261694
Broadleaved	119.4	29.8	1.76541	13.1602	4.6276	18.4	4.3	28.4	1378.5	1686.03	1534.2	72.27	9.08	36.56	15.34	1.6	8	2011	Literatures	Xie et al., 2011	Zhejiang A & F University	390.48	309.489	79.2585	80.9912	20.7415	0.261694
Broadleaved	119.4	29.8	1.76541	13.1602	4.6276	18.4	4.3	28.4	1378.5	1686.03	1534.2	78.49	13.01	15.12	18.18	0.92	8	2011	Literatures	Xie et al., 2011	Zhejiang A & F University	390.48	309.489	79.2585	80.9912	20.7415	0.261694
Coniferous	115.8	40.5	3.532	8.02857	5.94	9.2	-8.6	22.9	493	2300	1770	14.85	3.78	48.3	8.83	1.67	10	2008	Literatures	Guo et al., 2008	Shangri-La	323.06	214.58	66.4211	108.48	33.5789	0.505545
Coniferous	115.8	40.5	3.213	8.15714	5.66	9.2	-8.6	22.9	493	2300	1770	14.85	3.46111	37.5	27.17	1.63	6	2018	Literatures	Liang et al., 2018	Lanzhou	323.06	214.58	66.4211	108.48	33.5789	0.505545
Broadleaved	119.62	29.12	1.76624	13.4037	4.52779	17	6.5	32.2	1414	1651.35	1587	17.8	17.2	15.97	11.6	0.37	9	2018	Literatures	Zhang et al., 2018	Zhejiang Normal University	395.43	307.18	77.6825	88.25	22.3175	0.287291
Broadleaved	119.62	29.12	1.76624	13.4037	4.52779	17	6.5	32.2	1414	1651.35	1587	17.4	16.3	14.73	11.6	0.37	9	2018	Literatures	Zhang et al., 2018	Zhejiang Normal University	395.43	307.18	77.6825	88.25	22.3175	0.287291
Broadleaved	114.62	27.66	1.59287	13.8083	4.73604	16.8	2.9	30.8	1590.9	1676.55	1876.4	62.04	8.5	26.2	16.1	1.41	7	2014	Literatures	Guo et al., 2014	Dagangshan forest ecosystem station	432.49	357.59	82.6818	74.8997	17.3182	0.209457
Broadleaved	114.62	27.66	1.59287	13.8083	4.73604	16.8	2.9	30.8	1590.9	1676.55	1876.4	90	7.7	28.3	17.4	1.83	7	2014	Literatures	Guo et al., 2014	Dagangshan forest ecosystem station	432.49	357.59	82.6818	74.8997	17.3182	0.209457
Broadleaved	114.62	27.66	1.59287	13.8083	4.73604	16.8	2.9	30.8	1590.9	1676.55	1876.4	60	9.9	28.1	20.3	1.68	7	2014	Literatures	Guo et al., 2014	Dagangshan forest ecosystem station	432.49	357.59	82.6818	74.8997	17.3182	0.209457
Coniferous	128.1	42.4	3.24624	12.1286	5.96	3.3	-16.5	20.5	750	2200	1200	5.595	4.0375	38.1	24.53	1.1	6	2018	Literatures	Liang et al., 2018	Lanzhou	333.4	259.141	77.7268	74.2587	22.2732	0.286557
Coniferous	87.46	43.48	2.16069	5.85847	8.87331	2	-11.5	15.8	562	2975.17	1478.4	22.5	4.46	47	10.95	1.49	10	2008	Literatures	Guo et al., 2008	Shangri-La	145.01	19.4911	13.4412	125.519	86.5588	6.4398
Coniferous	87.46	43.48	2.25347	5.72847	8.88143	2	-11.5	15.8	562	2981.67	1478.4	18.9	15.1733	50	24.53	0.665935	6	2018	Literatures	Liang et al., 2018	Lanzhou	145.01	19.4911	13.4412	125.519	86.5588	6.4398
Coniferous	87.46	43.48	2.1143	5.92347	8.86925	2	-11.5	15.8	562	2971.92	1478.4	17.1	3.8	38	8	0.4	7	2018	Literatures	Zhang et al., 2018	Fujian Dongshan County	145.01	19.4911	13.4412	125.519	86.5588	6.4398
Coniferous	87.46	43.48	2.05507	6.00647	8.86406	2	-11.5	15.8	562	2967.77	1478.4	16.3	4.18	47	9.81	1.25	10	2008	Literatures	Guo et al., 2008	Shangri-La	145.01	19.4911	13.4412	125.519	86.5588	6.4398
Coniferous	87.46	43.48	1.97513	6.11847	8.85707	2	-11.5	15.8	562	2962.17	1478.4	14.8	3.5	51	8.69	1.88	10	2008	Literatures	Guo et al., 2008	Shangri-La	145.01	19.4911	13.4412	125.519	86.5588	6.4398
Coniferous	87.46	43.48	2.2963	5.66847	8.88517	2	-11.5	15.8	562	2984.67	1478.4	14.8	5.33556	40.91	27.17	2.3	6	2018	Literatures	Liang et al., 2018	Lanzhou	145.01	19.4911	13.4412	125.519	86.5588	6.4398
Coniferous	87.46	43.48	1.90876	6.21147	8.85126	2	-11.5	15.8	562	2957.52	1478.4	14.3	13.28	41.8	13.3	1.18	5	2018	Literatures	Li et al., 2018	Guizhou Bijie	145.01	19.4911	13.4412	125.519	86.5588	6.4398
Coniferous	87.46	43.48	1.81241	6.34647	8.84283	2	-11.5	15.8	562	2950.77	1478.4	14.2	13.3	40.7	13.7	1.12	5	2018	Literatures	Li et al., 2018	Guizhou Bijie	145.01	19.4911	13.4412	125.519	86.5588	6.4398
Broadleaved	117.6	26.7	0.9	22	5.05	18.5	5.4	22.4	1800	1796	775	5.02	36.9	36.3019	24.52	1.1	7	2015	Literatures	Zhang et al., 2015	Fujian Nanping	369.24	298.317	80.7923	70.9227	19.2077	0.237742
Broadleaved	117.6	26.7	0.9	22	5.05	18.5	5.4	22.4	1800	1796	775	5.67	39.39	36.3019	24.53	1.18	7	2015	Literatures	Zhang et al., 2015	Fujian Nanping	369.24	298.317	80.7923	70.9227	19.2077	0.237742
Broadleaved	117.6	26.7	0.9	22	5.05	18.5	5.4	22.4	1800	1796	775	7.33	42.67	66.7712	27.57	1.41	7	2015	Literatures	Zhang et al., 2015	Fujian Nanping	369.24	298.317	80.7923	70.9227	19.2077	0.237742
Broadleaved	117.6	26.7	0.9	22	5.05	18.5	5.4	22.4	1800	1796	775	8.47	33.346	36.3019	27.17	1.36	7	2015	Literatures	Zhang et al., 2015	Fujian Nanping	369.24	298.317	80.7923	70.9227	19.2077	0.237742
Broadleaved	117.6	26.7	0.9	22	5.05	18.5	5.4	22.4	1800	1796	775	8.83	33.85	66.7712	22.92	1.24	7	2015	Literatures	Zhang et al., 2015	Fujian Nanping	369.24	298.317	80.7923	70.9227	19.2077	0.237742
Broadleaved	111.5	26.2	1.74584	13.8805	4.82241	18	5.2	34.2	1745	1686.15	1934	11.68	13.176	14.73	15.9	1.43	7	2017	Literatures	Zhang et al., 2017	Yongzhou	387.73	302.109	77.9174	85.6207	22.0826	0.28341
Broadleaved	111.5	26.2	1.74584	13.8805	4.82241	18	5.2	34.2	1745	1686.15	1934	13.64	14.296	16.69	19.5	1.06	7	2017	Literatures	Zhang et al., 2017	Yongzhou	387.73	302.109	77.9174	85.6207	22.0826	0.28341
Broadleaved	102.91	25.7	2.35871	12.6204	5.50288	15	5.6	20.8	1035	1882.53	879	118.26	28.156	23	23.8	1.1	8	2018	Literatures	Zhang et al., 2018	Kunming	427.13	306.759	71.8187	120.371	28.1813	0.392394
Broadleaved	102.91	25.7	2.35871	12.6204	5.50288	15	5.6	20.8	1035	1882.53	879	60.7	12.295	38	23.8	2.3	8	2018	Literatures	Zhang et al., 2018	Kunming	427.13	306.759	71.8187	120.371	28.1813	0.392394
Broadleaved	102.91	25.7	2.35871	12.6204	5.50288	15	5.6	20.8	1035	1882.53	879	48.73	17.873	32	23.8	1.83875	8	2018	Literatures	Zhang et al., 2018	Kunming	427.13	306.759	71.8187	120.371	28.1813	0.392394
Broadleaved	102.91	25.7	2.35871	12.6204	5.50288	15	5.6	20.8	1035	1882.53	879	17.7	17.111	31	22.92	2.5851	8	2018	Literatures	Zhang et al., 2018	Kunming	427.13	306.759	71.8187	120.371	28.1813	0.392394
Broadleaved	102.91	25.7	2.35871	12.6204	5.50288	15	5.6	20.8	1035	1882.53	879	20.31	9.521	40	22.92	2.3	8	2018	Literatures	Zhang et al., 2018	Kunming	427.13	306.759	71.8187	120.371	28.1813	0.392394
Broadleaved	102.91	25.7	2.35871	12.6204	5.50288	15	5.6	20.8	1035	1882.53	879	10.89	5.346	42	27.57	1.97691	8	2018	Literatures	Zhang et al., 2018	Kunming	427.13	306.759	71.8187	120.371	28.1813	0.392394
Broadleaved	102.91	25.7	2.35871	12.6204	5.50288	15	5.6	20.8	1035	1882.53	879	24.49	11.844	46	25.43	1.66	8	2018	Literatures	Zhang et al., 2018	Kunming	427.13	306.759	71.8187	120.371	28.1813	0.392394
Broadleaved	102.91	25.7	2.35871	12.6204	5.50288	15	5.6	20.8	1035	1882.53	879	15.78	6.213	44	37.78	2.3	8	2018	Literatures	Zhang et al., 2018	Kunming	427.13	306.759	71.8187	120.371	28.1813	0.392394
Broadleaved	102.91	25.7	2.35871	12.6204	5.50288	15	5.6	20.8	1035	1882.53	879	29.67	7.916	30	26.79	0.988996	8	2018	Literatures	Zhang et al., 2018	Kunming	427.13	306.759	71.8187	120.371	28.1813	0.392394
Broadleaved	102.91	25.7	2.35871	12.6204	5.50288	15	5.6	20.8	1035	1882.53	879	43.3	7.553	31	21.35	1.88736	8	2018	Literatures	Zhang et al., 2018	Kunming	427.13	306.759	71.8187	120.371	28.1813	0.392394
Broadleaved	102.91	25.7	2.35871	12.6204	5.50288	15	5.6	20.8	1035	1882.53	879	15.16	15.676	50	19.5	1.07	8	2018	Literatures	Zhang et al., 2018	Kunming	427.13	306.759	71.8187	120.371	28.1813	0.392394
Broadleaved	102.91	25.7	2.35871	12.6204	5.50288	15	5.6	20.8	1035	1882.53	879	41.49	10.927	15	17.2	0.87387	8	2018	Literatures	Zhang et al., 2018	Kunming	427.13	306.759	71.8187	120.371	28.1813	0.392394
Broadleaved	102.91	25.7	2.35871	12.6204	5.50288	15	5.6	20.8	1035	1882.53	879	76.78	13.66	57	26.78	1.99979	8	2018	Literatures	Zhang et al., 2018	Kunming	427.13	306.759	71.8187	120.371	28.1813	0.392394
Broadleaved	102.91	25.7	2.35871	12.6204	5.50288	15	5.6	20.8	1035	1882.53	879	16.96	15.947	46	15.9	1.63705	8	2018	Literatures	Zhang et al., 2018	Kunming	427.13	306.759	71.8187	120.371	28.1813	0.392394
Broadleaved	102.91	25.7	2.35871	12.6204	5.50288	15	5.6	20.8	1035	1882.53	879	9.35	26.444	29	19.5	1.4	8	2018	Literatures	Zhang et al., 2018	Kunming	427.13	306.759	71.8187	120.371	28.1813	0.392394
Broadleaved	102.91	25.7	2.35871	12.6204	5.50288	15	5.6	20.8	1035	1882.53	879	12.28	28.169	32	27.63	1.73491	8	2018	Literatures	Zhang et al., 2018	Kunming	427.13	306.759	71.8187	120.371	28.1813	0.392394
Broadleaved	102.91	25.7	2.35871	12.6204	5.50288	15	5.6	20.8	1035	1882.53	879	70.78	6.155	42	22.92	1.66	8	2018	Literatures	Zhang et al., 2018	Kunming	427.13	306.759	71.8187	120.371	28.1813	0.392394
Broadleaved	102.91	25.7	2.35871	12.6204	5.50288	15	5.6	20.8	1035	1882.53	879	9.33	10.137	63	27.17	2.15052	8	2018	Literatures	Zhang et al., 2018	Kunming	427.13	306.759	71.8187	120.371	28.1813	0.392394
Broadleaved	102.91	25.7	2.35871	12.6204	5.50288	15	5.6	20.8	1035	1882.53	879	22.32	8.55	54	24.52	2.09513	8	2018	Literatures	Zhang et al., 2018	Kunming	427.13	306.759	71.8187	120.371	28.1813	0.392394
Broadleaved	102.91	25.7	2.35871	12.6204	5.50288	15	5.6	20.8	1035	1882.53	879	21.52	6.073	55	26.78	2.38575	8	2018	Literatures	Zhang et al., 2018	Kunming	427.13	306.759	71.8187	120.371	28.1813	0.392394
Broadleaved	102.91	25.7	2.35871	12.6204	5.50288	15	5.6	20.8	1035	1882.53	879	35.42	13.124	47	24.52	1.59868	8	2018	Literatures	Zhang et al., 2018	Kunming	427.13	306.759	71.8187	120.371	28.1813	0.392394
Broadleaved	102.91	25.7	2.35871	12.6204	5.50288	15	5.6	20.8	1035	1882.53	879	47.23	10.827	39	19.5	2.3	8	2018	Literatures	Zhang et al., 2018	Kunming	427.13	306.759	71.8187	120.371	28.1813	0.392394
Broadleaved	102.91	25.7	2.35871	12.6204	5.50288	15	5.6	20.8	1035	1882.53	879	40.43	9.659	49	19.5	0.992952	8	2018	Literatures	Zhang et al., 2018	Kunming	427.13	306.759	71.8187	120.371	28.1813	0.392394
Broadleaved	102.91	25.7	2.35871	12.6204	5.50288	15	5.6	20.8	1035	1882.53	879	27.71	11.594	53	32.61	2.3843	8	2018	Literatures	Zhang et al., 2018	Kunming	427.13	306.759	71.8187	120.371	28.1813	0.392394
Coniferous	87.46	43.48	1.7289	6.46347	8.83553	2	-11.5	15.8	562	2944.92	1478.4	13.5	13.35	41.5	13.1	1.15	5	2018	Literatures	Li et al., 2018	Guizhou Bijie	145.01	19.4911	13.4412	125.519	86.5588	6.4398
Coniferous	87.46	43.48	1.66824	6.54847	8.83022	2	-11.5	15.8	562	2940.67	1478.4	13	5	58	12.5	1.1	8	2010	Literatures	Li et al., 2010	ziwu mountain	145.01	19.4911	13.4412	125.519	86.5588	6.4398
Coniferous	127.73	43.95	2.91653	7.31499	5.77401	3.8	-18.6	21.7	750	2225.47	435	10.6	5	58	12.5	1.1	8	2010	Literatures	Li et al., 2010	ziwu mountain	341.35	256.902	75.2605	84.4482	24.7395	0.328718
Broadleaved	117.414	23.648	1.49158	15.4927	4.01813	20.8	6.9	32.5	1945	1433.93	1056	13.2	9.5	32	32	1.34	7	2018	Literatures	Zhang et al., 2018	Fujian Dongshan County	483.18	304.994	63.1222	178.186	36.8778	0.584228
Broadleaved	117.403	23.638	1.48934	15.4985	4.0176	20.8	6.9	32.5	1945	1433.55	1056	42.3	9.6	31	17.2	0.85	7	2018	Literatures	Zhang et al., 2018	Fujian Dongshan County	384.07	242.433	63.1222	141.637	36.8778	0.584228
Broadleaved	117.42	23.513	1.48501	15.5479	4.00074	20.8	6.9	32.5	1945	1427.34	1056	2.8	6.1	43	15	0.5	7	2018	Literatures	Ye et al., 2018	Fujian Dongshan County	446.01	285.93	64.1084	160.08	35.8916	0.559858
Coniferous	127.73	43.95	2.91653	7.31499	5.77401	3.8	-18.6	21.7	750	2225.47	435	8.9	5	58	12.5	1.1	8	2010	Literatures	Li et al., 2010	ziwu mountain	341.35	256.902	75.2605	84.4482	24.7395	0.328718
Broadleaved	113.35	23.2	1.5	15.2	5.3	21.2	6.8	28.6	1706	1300	893	16.09	15.2	60.0204	19.2	1.3	8	2017	Literatures	Zhang et al., 2017	South China Botanical Garden	438.19	334.429	76.3206	103.761	23.6794	0.310262
Broadleaved	113.35	23.2	1.5	15.2	5.3	21.2	6.8	28.6	1706	1300	893	33.84	17.5	25.5	18.5	1.38	8	2017	Literatures	Zhang et al., 2017	South China Botanical Garden	438.19	334.429	76.3206	103.761	23.6794	0.310262
Broadleaved	113.35	23.2	1.5	15.2	5.3	21.2	6.8	28.6	1706	1300	893	25.26	24.7	20.2073	20.7	1.32	8	2017	Literatures	Zhang et al., 2017	South China Botanical Garden	438.19	334.429	76.3206	103.761	23.6794	0.310262
Broadleaved	113.35	23.2	1.5	15.2	5.3	21.2	6.8	28.6	1706	1300	893	20.7467	7.6	28.3133	11.6	0.85	8	2017	Literatures	Zhang et al., 2017	South China Botanical Garden	438.19	334.429	76.3206	103.761	23.6794	0.310262
Broadleaved	113.35	23.2	1.5	15.2	5.3	21.2	6.8	28.6	1706	1300	893	11.68	11.7	25.9843	10.4	0.58	8	2017	Literatures	Zhang et al., 2017	South China Botanical Garden	438.19	334.429	76.3206	103.761	23.6794	0.310262
Broadleaved	113.35	23.2	1.5	15.2	5.3	21.2	6.8	28.6	1706	1300	893	49.7133	7.2	26.4463	10.2	0.54	8	2017	Literatures	Zhang et al., 2017	South China Botanical Garden	438.19	334.429	76.3206	103.761	23.6794	0.310262
Coniferous	127.73	43.95	2.91653	7.31499	5.77401	3.8	-18.6	21.7	750	2225.47	435	8	5.10526	42.7	21.35	1.1	6	2018	Literatures	Liang et al., 2018	Lanzhou	141.35	106.381	75.2605	34.9693	24.7395	0.328718
Coniferous	121.3	49.6	1.23126	20	8.2	1.3	-10.5	14.3	378.5	2550	1917.4	9.5	12.7	44.1	11.9	1.21	5	2018	Literatures	Li et al., 2018	Guizhou Bijie	240.42	175.372	72.9439	65.0482	27.0561	0.370916
Coniferous	122.05	49.72	1.23126	20	8.2	1.3	-10.5	14.3	378.5	2550	1917.4	11.16	12.5	43.7	11.6	1.16	5	2018	Literatures	Li et al., 2018	Guizhou Bijie	313.19	211.488	67.5271	101.702	32.4729	0.480888
Broadleaved	107	23	1.36628	15.1958	4.76206	21.5	13.1	27.8	1296	1500	1572	78	5.7	36.2	15.9	2.31779	8	2019	Literatures	Zeng et al., 2019	Guangxi Pingguo County	419.98	304.87	72.5914	115.11	27.4086	0.377573
Broadleaved	107	23	1.36628	15.1958	4.76206	21.5	13.1	27.8	1296	1500	1572	24.2	7.3	30.2	15	1.15	8	2019	Literatures	Zeng et al., 2019	Guangxi Pingguo County	419.98	304.87	72.5914	115.11	27.4086	0.377573
Broadleaved	107	23	1.36628	15.1958	4.76206	21.5	13.1	27.8	1296	1500	1572	115	11	28.4	32	1.05	8	2019	Literatures	Zeng et al., 2019	Guangxi Pingguo County	419.98	304.87	72.5914	115.11	27.4086	0.377573
Broadleaved	107	23	1.36628	15.1958	4.76206	21.5	13.1	27.8	1296	1500	1572	89.2	11.4	32.4	17.2	2.04141	8	2019	Literatures	Zeng et al., 2019	Guangxi Pingguo County	419.98	304.87	72.5914	115.11	27.4086	0.377573
Broadleaved	107	23	1.36628	15.1958	4.76206	21.5	13.1	27.8	1296	1500	1572	48.3	8.7	36.8	15	1.75	8	2019	Literatures	Zeng et al., 2019	Guangxi Pingguo County	419.98	304.87	72.5914	115.11	27.4086	0.377573
Broadleaved	107.8	22.8	1.06212	15.7427	4.64723	21.6	12.8	28.2	1304	1500	876	22.38	16.3	32	11	1.07	7	2018	Literatures	Jian et al., 2018	Guangxi University	431.39	335.703	77.8189	95.687	22.1811	0.285035
Broadleaved	107.8	22.8	1.06212	15.7427	4.64723	21.6	12.8	28.2	1304	1500	876	43	12.8	31	10.8	0.48	1	2019	Literatures	Jian et al., 2019	Guangxi University	431.39	335.703	77.8189	95.687	22.1811	0.285035
Broadleaved	107.8	22.8	1.06212	15.7427	4.64723	21.6	12.8	28.2	1304	1500	876	21.52	11.8	31	14.2	0.91	7	2018	Literatures	Jian et al., 2018	Guangxi University	431.39	335.703	77.8189	95.687	22.1811	0.285035
Broadleaved	107.8	22.8	1.06212	15.7427	4.64723	21.6	12.8	28.2	1304	1500	876	21	8.7	37	17.3	0.76	1	2019	Literatures	Jian et al., 2019	Guangxi University	431.39	335.703	77.8189	95.687	22.1811	0.285035
Broadleaved	107.8	22.8	1.06212	15.7427	4.64723	21.6	12.8	28.2	1304	1500	876	24.91	10.9	58	9.8	0.46	7	2018	Literatures	Jian et al., 2018	Guangxi University	431.39	335.703	77.8189	95.687	22.1811	0.285035
Broadleaved	107.8	22.8	1.06212	15.7427	4.64723	21.6	12.8	28.2	1304	1500	876	17.7	6.7	39	10.3	0.37	1	2019	Literatures	Jian et al., 2019	Guangxi University	431.39	335.703	77.8189	95.687	22.1811	0.285035
Broadleaved	107.8	22.8	1.06212	15.7427	4.64723	21.6	12.8	28.2	1304	1500	876	18.15	11.2	48	11.8	0.56	7	2018	Literatures	Jian et al., 2018	Guangxi University	431.39	335.703	77.8189	95.687	22.1811	0.285035
Broadleaved	107.8	22.8	1.06212	15.7427	4.64723	21.6	12.8	28.2	1304	1500	876	2.8	6.8	43	11.2	0.89	1	2019	Literatures	Jian et al., 2019	Guangxi University	431.39	335.703	77.8189	95.687	22.1811	0.285035
Broadleaved	107.8	22.8	1.06212	15.7427	4.64723	21.6	12.8	28.2	1304	1500	876	84.3867	4.9	51	10.5	0.67	7	2018	Literatures	Jian et al., 2018	Guangxi University	431.39	335.703	77.8189	95.687	22.1811	0.285035
Broadleaved	107.8	22.8	1.06212	15.7427	4.64723	21.6	12.8	28.2	1304	1500	876	43	6.8	44.7	9.2	0.32	1	2019	Literatures	Jian et al., 2019	Guangxi University	431.39	335.703	77.8189	95.687	22.1811	0.285035
Broadleaved	107.8	22.8	1.06212	15.7427	4.64723	21.6	12.8	28.2	1304	1500	876	33.95	7.3	45.2	13.8	0.43	7	2018	Literatures	Jian et al., 2018	Guangxi University	431.39	335.703	77.8189	95.687	22.1811	0.285035
Broadleaved	107.8	22.8	1.06212	15.7427	4.64723	21.6	12.8	28.2	1304	1500	876	2.8	5.8	42.1	14.1	1.9	1	2019	Literatures	Jian et al., 2019	Guangxi University	431.39	335.703	77.8189	95.687	22.1811	0.285035
Broadleaved	108.3	22.7	1.11212	15.7397	4.59949	21.6	12.8	28	1280	1551.58	1394	120	14	37	27.63	0.98	8	2019	Literatures	Tan et al., 2019	Nanning Liangfengjiang forest farm	343.52	268.799	78.2484	74.7211	21.7516	0.277982
Broadleaved	108.3	22.7	1.11212	15.7397	4.59949	21.6	12.8	28	1280	1551.58	1394	100	13	39	15.9	1.75	8	2019	Literatures	Tan et al., 2019	Nanning Liangfengjiang forest farm	343.52	268.799	78.2484	74.7211	21.7516	0.277982
Broadleaved	108.3	22.7	1.11212	15.7397	4.59949	21.6	12.8	28	1280	1551.58	1394	90	13	39	22.34	1.16	8	2019	Literatures	Tan et al., 2019	Nanning Liangfengjiang forest farm	343.52	268.799	78.2484	74.7211	21.7516	0.277982
Broadleaved	108.3	22.7	1.11212	15.7397	4.59949	21.6	12.8	28	1280	1551.58	1394	15	12	58	17.2	0.96	8	2019	Literatures	Tan et al., 2019	Nanning Liangfengjiang forest farm	343.52	268.799	78.2484	74.7211	21.7516	0.277982
Broadleaved	108.3	22.7	1.11212	15.7397	4.59949	21.6	12.8	28	1280	1551.58	1394	15	11.1	59	10.2	0.4	8	2019	Literatures	Tan et al., 2019	Nanning Liangfengjiang forest farm	343.52	268.799	78.2484	74.7211	21.7516	0.277982
Broadleaved	108.3	22.7	1.11212	15.7397	4.59949	21.6	12.8	28	1280	1551.58	1394	14	10	57	15	0.43	8	2019	Literatures	Tan et al., 2019	Nanning Liangfengjiang forest farm	343.52	268.799	78.2484	74.7211	21.7516	0.277982
Broadleaved	108.3	22.7	1.11212	15.7397	4.59949	21.6	12.8	28	1280	1551.58	1394	60	20	27	26.78	1.41	8	2019	Literatures	Tan et al., 2019	Nanning Liangfengjiang forest farm	343.52	268.799	78.2484	74.7211	21.7516	0.277982
Broadleaved	108.3	22.7	1.11212	15.7397	4.59949	21.6	12.8	28	1280	1551.58	1394	65	17.5	28.1	15.9	1.18	8	2019	Literatures	Tan et al., 2019	Nanning Liangfengjiang forest farm	343.52	268.799	78.2484	74.7211	21.7516	0.277982
Broadleaved	108.3	22.7	1.11212	15.7397	4.59949	21.6	12.8	28	1280	1551.58	1394	71	18.1	27.6	15.9	1.12	8	2019	Literatures	Tan et al., 2019	Nanning Liangfengjiang forest farm	343.52	268.799	78.2484	74.7211	21.7516	0.277982
Broadleaved	108.3	22.7	1.11212	15.7397	4.59949	21.6	12.8	28	1280	1551.58	1394	47	14.2	48	22.34	0.9	8	2019	Literatures	Tan et al., 2019	Nanning Liangfengjiang forest farm	343.52	268.799	78.2484	74.7211	21.7516	0.277982
Broadleaved	108.3	22.7	1.11212	15.7397	4.59949	21.6	12.8	28	1280	1551.58	1394	61	15.1	46	22.34	0.9	8	2019	Literatures	Tan et al., 2019	Nanning Liangfengjiang forest farm	343.52	268.799	78.2484	74.7211	21.7516	0.277982
Broadleaved	108.3	22.7	1.11212	15.7397	4.59949	21.6	12.8	28	1280	1551.58	1394	50	14.6	45.1	19.5	0.85	8	2019	Literatures	Tan et al., 2019	Nanning Liangfengjiang forest farm	343.52	268.799	78.2484	74.7211	21.7516	0.277982
Coniferous	122.344	53.4683	0.6	1.15714	5.89	-5.5	-28.9	13.5	430	2446.4	1287	10.02	12.69	43.5	11.1	1.12	5	2018	Literatures	Li et al., 2018	Guizhou Bijie	287.1	177.859	61.9501	109.241	38.0499	0.614203
Coniferous	122.344	53.4683	0.6	1.15714	5.89	-5.5	-28.9	13.5	430	2446.4	1287	9.68	11.9	17.33	11.6	0.37	9	2018	Literatures	Jin et al., 2018	Zhejiang Normal University	287.1	177.859	61.9501	109.241	38.0499	0.614203
Coniferous	122.344	53.4683	0.6	1.15714	5.89	-5.5	-28.9	13.5	430	2446.4	1287	5.56	12.1	14.73	8.626	0.29	9	2018	Literatures	Jin et al., 2018	Zhejiang Normal University	287.1	177.859	61.9501	109.241	38.0499	0.614203
Coniferous	106.9	21.8	1.23747	15.7754	4.61358	21.8	8.2	28.9	1475	1300	765	3.001	27.2	21.2	NA	0.65	7	2013	Literatures	Xiao et al., 2013	Taiyue Mountain in Shanxi Province	410.09	274.637	66.97	135.453	33.03	0.493207
Coniferous	106.9	21.8	1.23747	15.7754	4.61358	21.8	8.2	28.9	1475	1300	765	2.983	11.1	27.2	NA	0.61	5	2019	Literatures	Yang et al., 2019	Tai-hang Mountains	410.09	274.637	66.97	135.453	33.03	0.493207
Coniferous	109.1	23.05	1.34455	15.3488	4.59817	21.5	7.8	28.2	1477.8	1300	725	24	8.6	27.6	NA	1.7	5	2019	Literatures	Yang et al., 2019	Tai-hang Mountains	418.52	328.253	78.4318	90.2672	21.5682	0.274993
Coniferous	109.1	23.05	1.34455	15.3488	4.59817	21.5	7.8	28.2	1477.8	1300	725	21	26.2	36.1	NA	1.05536	5	2019	Literatures	Yang et al., 2019	Tai-hang Mountains	418.52	328.253	78.4318	90.2672	21.5682	0.274993
Coniferous	119.7	25.5	2	3	5	19.4	11	28	1500	1919.7	1917.4	3.064	31.5	32.1	NA	0.6	7	2013	Literatures	Xiao et al., 2013	Taiyue Mountain in Shanxi Province	404.51	316.828	78.3238	87.6824	21.6762	0.276751
Broadleaved	122.18	42.78	2.45818	7.9843	6.03642	5.6	-8.6	20.9	450	2254.84	1770	3.166	12	32	NA	1.22981	7	2013	Literatures	Liu et al., 2013	Daqinggou Nature Reserve	324.17	230.148	70.9962	94.0218	29.0038	0.408527
Broadleaved	122.18	42.78	2.45818	7.9843	6.03642	5.6	-11.5	19.8	450	2254.84	1917.4	3.158	15	35	NA	0.4	7	2013	Literatures	Liu et al., 2013	Daqinggou Nature Reserve	324.17	230.148	70.9962	94.0218	29.0038	0.408527
Broadleaved	122.18	42.78	2.45818	7.9843	6.03642	5.6	-8.6	21.6	450	2254.84	2312	3.137	28	24	NA	1.3	7	2013	Literatures	Liu et al., 2013	Daqinggou Nature Reserve	324.17	230.148	70.9962	94.0218	29.0038	0.408527
Coniferous	101.83	29.6666	2.63	6.74	6.5	8.5	4.1	16.7	1387	2100	1893	3.482	12.9	42.1	NA	0.41	5	2019	Literatures	Yang et al., 2019	Tai-hang Mountains	289.63	167.756	57.9209	121.874	42.0791	0.726491
Coniferous	108.66	35.3	2.47341	9.59483	6.21447	7	-7	16.8	600	2199.82	1256	2	36.7	28.7	NA	0.4	8	2013	Literatures	Chen et al., 2013	Xingdou Mountain	260.54	96.128	36.8957	164.412	63.1043	1.71034
Coniferous	103.4	36.03	2.26	9.29761	6.70503	10.3	-2.3	23.2	327	2324.89	2589	6.2	10.1	23.8	NA	1.30132	5	2019	Literatures	Yang et al., 2019	Tai-hang Mountains	289.06	128.753	44.542	160.307	55.458	1.24507
Coniferous	115.8	40.5	5.514	11.3429	5.32	9.2	-8.6	22.9	493	2300	1770	3.008	8.7	28.5	NA	1.04626	5	2019	Literatures	Yang et al., 2019	Tai-hang Mountains	323.06	214.58	66.4211	108.48	33.5789	0.505545
Coniferous	115.8	40.5	4.055	7.27143	5.75	9.2	-8.6	22.9	493	2300	1770	3.007	13.2	39.9	NA	0.53	5	2019	Literatures	Yang et al., 2019	Tai-hang Mountains	323.06	214.58	66.4211	108.48	33.5789	0.505545
Coniferous	115.8	40.5	4.053	6.04286	6	9.2	-8.6	22.9	493	2300	1770	2.982	32.5	23.7	NA	2.59026	8	2013	Literatures	Chen et al., 2013	Xingdou Mountain	323.06	214.58	66.4211	108.48	33.5789	0.505545
Broadleaved	88.372	40.151	1.17612	8.42446	8.31135	10.7	-7.8	24.8	28.5	2739.53	2750	50	3.6	46.2	NA	1.58	7	2018	Literatures	Chen et al., 2018	Tarim River	137.11	78.7927	57.4668	58.3173	42.5332	0.740135
Broadleaved	88.349	40.147	1.17734	8.42258	8.31281	10.7	-7.8	24.8	28.5	2739.9	2750	13	5.5	40	NA	2.575	7	2018	Literatures	Chen et al., 2018	Tarim River	193.45	111.17	57.4668	82.2805	42.5332	0.740135
Broadleaved	88.346	40.144	1.18182	8.41712	8.31308	10.7	-7.8	24.8	28.5	2740.14	2750	10.97	6.5	36.1	NA	1.8	7	2018	Literatures	Chen et al., 2018	Tarim River	171.45	98.5268	57.4668	72.9232	42.5332	0.740135
Broadleaved	88.375	40.105	1.1774	8.43843	8.30566	10.7	-7.8	24.8	28.5	2737.51	2750	36.94	4.1	44.6	NA	2.1	7	2018	Literatures	Chen et al., 2018	Tarim River	162.33	93.0574	57.3261	69.2726	42.6739	0.744408
Broadleaved	88.365	40.104	1.17582	8.44031	8.3062	10.7	-7.8	24.8	28.5	2737.56	2750	58.83	4.8	42.4	NA	2.5	7	2018	Literatures	Chen et al., 2018	Tarim River	119.09	68.2696	57.3261	50.8204	42.6739	0.744408
Coniferous	115.8	40.5	3.918	9.18571	6.03	9.2	-8.6	22.9	493	2300	1770	3.48	25.6	24.2	NA	0.873253	8	2013	Literatures	Chen et al., 2013	Xingdou Mountain	323.06	214.58	66.4211	108.48	33.5789	0.505545
Broadleaved	112.15	36.55	2.73513	9.03714	6.10937	6.2	-2.8	11.8	662	2202.36	1523	25.2	22	36.1	NA	1.3	7	2013	Literatures	Xiao et al., 2013	Taiyue Mountain in Shanxi Province	353.18	238.464	67.5192	114.716	32.4808	0.48106
Broadleaved	112.15	36.55	2.73513	9.03714	6.10937	6.2	-2.8	11.8	662	2202.36	1760	17.8	21.8	36.3	NA	1.4	7	2013	Literatures	Xiao et al., 2013	Taiyue Mountain in Shanxi Province	353.18	238.464	67.5192	114.716	32.4808	0.48106
Broadleaved	103.1	30.325	2.27985	11.2919	5.83872	16.1	6.1	25.3	1732	2118.07	3911	22.59	12.25	49.59	NA	0.58	4	2013	Literatures	Wu et al., 2013	Sichuan Yaan	312.63	214.936	68.7509	97.6942	31.2491	0.454527
Broadleaved	103.1	30.325	2.27985	11.2919	5.83872	16.1	6.1	25.3	1732	2118.07	3911	15.55	11.31	48.42	NA	0.88	4	2013	Literatures	Wu et al., 2013	Sichuan Yaan	312.63	214.936	68.7509	97.6942	31.2491	0.454527
Broadleaved	103.1	30.325	2.27985	11.2919	5.83872	16.1	6.1	25.3	1732	2118.07	3911	25.83	11.82	45.63	NA	0.65	4	2013	Literatures	Wu et al., 2013	Sichuan Yaan	312.63	214.936	68.7509	97.6942	31.2491	0.454527
Broadleaved	103.1	30.325	2.27985	11.2919	5.83872	16.1	6.1	25.3	1732	2118.07	1893	53.13	14.75	36.23	NA	1.37512	4	2013	Literatures	Wu et al., 2013	Sichuan Yaan	312.63	214.936	68.7509	97.6942	31.2491	0.454527
Broadleaved	103.1	30.325	2.27985	11.2919	5.83872	16.1	6.1	25.3	1732	2118.07	1268	24.33	13.69	51.93	NA	2.04	4	2013	Literatures	Wu et al., 2013	Sichuan Yaan	312.63	214.936	68.7509	97.6942	31.2491	0.454527
Broadleaved	103.1	30.325	2.27985	11.2919	5.83872	16.1	6.1	25.3	1732	2118.07	3950	74.05	20.76	41.96	NA	0.32	4	2013	Literatures	Wu et al., 2013	Sichuan Yaan	312.63	214.936	68.7509	97.6942	31.2491	0.454527
Broadleaved	103.1	30.325	2.27985	11.2919	5.83872	16.1	6.1	25.3	1732	2118.07	3950	36.11	23.49	36.89	NA	1.3	4	2013	Literatures	Wu et al., 2013	Sichuan Yaan	312.63	214.936	68.7509	97.6942	31.2491	0.454527
Broadleaved	103.1	30.325	2.27985	11.2919	5.83872	16.1	6.1	25.3	1732	2118.07	3950	50.9	23.97	30.67	NA	0.32	4	2013	Literatures	Wu et al., 2013	Sichuan Yaan	312.63	214.936	68.7509	97.6942	31.2491	0.454527
Broadleaved	103.1	30.325	2.27985	11.2919	5.83872	16.1	6.1	25.3	1732	2118.07	2086	15.52	11.57	39	NA	1.41	4	2013	Literatures	Wu et al., 2013	Sichuan Yaan	312.63	214.936	68.7509	97.6942	31.2491	0.454527
Broadleaved	103.1	30.325	2.27985	11.2919	5.83872	16.1	6.1	25.3	1732	2118.07	3911	24.08	7.995	43.15	NA	0.65	4	2013	Literatures	Wu et al., 2013	Sichuan Yaan	312.63	214.936	68.7509	97.6942	31.2491	0.454527
Broadleaved	103.1	30.325	2.27985	11.2919	5.83872	16.1	6.1	25.3	1732	2118.07	3911	38	18	48	NA	0.58	4	2013	Literatures	Du et al., 2013	Sichuan Yaan	312.63	214.936	68.7509	97.6942	31.2491	0.454527
Broadleaved	103.1	30.325	2.27985	11.2919	5.83872	16.1	6.1	25.3	1732	2118.07	3911	60	16	48.5	NA	0.32	4	2013	Literatures	Wu et al., 2013	Sichuan Yaan	312.63	214.936	68.7509	97.6942	31.2491	0.454527
Broadleaved	103.1	30.325	2.27985	11.2919	5.83872	16.1	6.1	25.3	1732	2118.07	3911	41	16	43	NA	1.3	4	2013	Literatures	Wu et al., 2013	Sichuan Yaan	312.63	214.936	68.7509	97.6942	31.2491	0.454527
Broadleaved	103.1	30.325	2.27985	11.2919	5.83872	16.1	6.1	25.3	1732	2118.07	3911	52	18.5	43	NA	1.4	4	2013	Literatures	Wu et al., 2013	Sichuan Yaan	312.63	214.936	68.7509	97.6942	31.2491	0.454527
Broadleaved	103.1	30.325	2.27985	11.2919	5.83872	16.1	6.1	25.3	1732	2118.07	3950	38	14	49	NA	0.32	4	2013	Literatures	Wu et al., 2013	Sichuan Yaan	312.63	214.936	68.7509	97.6942	31.2491	0.454527
Broadleaved	110.67	30.2	1.78798	12.4136	5.37653	12.8	4.8	19.5	1400	1883.93	1228	21	40	22.34	NA	0.32	7	2009	Literatures	Zhan et al., 2009	Houhe Nature Reserve	362.86	297.561	82.0044	65.2988	17.9956	0.219446
Broadleaved	110.67	30.2	1.78798	12.4136	5.37653	12.8	4.8	19.5	1400	1883.93	1228	14.94	12	27.6	NA	1.4	7	2009	Literatures	Zhan et al., 2009	Houhe Nature Reserve	362.86	297.561	82.0044	65.2988	17.9956	0.219446
Broadleaved	110.67	30.2	1.78798	12.4136	5.37653	12.8	4.8	19.5	1400	1883.93	1228	27.23	13	34.423	NA	0.88	7	2009	Literatures	Zhan et al., 2009	Houhe Nature Reserve	362.86	297.561	82.0044	65.2988	17.9956	0.219446
Broadleaved	110.67	30.2	1.78798	12.4136	5.37653	12.8	4.8	19.5	1400	1883.93	1228	29.88	12	21.3	NA	1.2	7	2009	Literatures	Zhan et al., 2009	Houhe Nature Reserve	362.86	297.561	82.0044	65.2988	17.9956	0.219446
Broadleaved	110.67	30.2	1.78798	12.4136	5.37653	12.8	4.8	19.5	1400	1883.93	1228	13.94	18	32.1	NA	1.2	7	2009	Literatures	Zhan et al., 2009	Houhe Nature Reserve	362.86	297.561	82.0044	65.2988	17.9956	0.219446
Broadleaved	117.52	30.02	1.90464	12.7659	4.81684	11.8	3.3	27.3	1973	1744.01	550	25.15	23.8	35.453	NA	1.525	7	2017	Literatures	Hu et al., 2017	Quxi	433.35	332.196	76.6576	101.154	23.3424	0.304502
Broadleaved	103.05	29.97	1.73543	12.0589	5.95384	14	-0.2	26.5	1774.3	2025.86	1945.6	50.52	11.34	37	NA	1.48	7	2018	Literatures	Wu et al., 2018	Szechwan	319.56	214.302	67.0616	105.258	32.9384	0.491166
Broadleaved	103.05	29.97	1.73543	12.0589	5.95384	14	-0.2	26.5	1774.3	2025.86	1945.6	46.56	13.01	38.1	NA	1.44	7	2018	Literatures	Wu et al., 2018	Szechwan	319.56	214.302	67.0616	105.258	32.9384	0.491166
Broadleaved	103.05	29.97	1.73543	12.0589	5.95384	14	-0.2	26.5	1774.3	2025.86	1945.6	43.41	14.07	35	NA	1.46	7	2018	Literatures	Wu et al., 2018	Szechwan	319.56	214.302	67.0616	105.258	32.9384	0.491166
Broadleaved	119.13	29.44	1.96804	12.9802	4.62337	16.9	4.9	28.1	1712	1689.74	1770	33.56	20.41	38.745	NA	1.4	7	2017	Literatures	Hu et al., 2017	Quxi	447.31	355.059	79.3766	92.2505	20.6234	0.259817
Broadleaved	102.25	28.63	2.48567	11.4078	5.92135	11.4	3.4	30.2	1095	2035.2	3950	36.11	7.35294	51.2	NA	1.5	7	2014	Literatures	Si et al., 2014	Southwest latitudinal zone	363.59	251.89	69.2785	111.7	30.7216	0.44345
Broadleaved	102.21	28.56	2.24618	11.7643	5.89512	15	0.8	17.5	960	2016.13	1234	19.8	5.8	51.2	NA	0.88	7	2014	Literatures	Yang et al., 2014	Mianning	332.2	231.239	69.6085	100.961	30.3915	0.436606
Broadleaved	102.26	27.83	2.24903	12.0106	5.80304	14.7	0.3	17.5	1027	1982.84	1894	36.2	6.5	47	NA	0.32	7	2014	Literatures	Yang et al., 2014	Xichang	323.18	236.691	73.2381	86.4889	26.7618	0.365409
Coniferous	115.8	40.5	1.314	5.37143	6.47	9.2	-8.6	22.9	493	2300	1770	30.2	30.5	20.9	NA	1.2	7	2013	Literatures	Xiao et al., 2013	Taiyue Mountain in Shanxi Province	323.06	214.58	66.4211	108.48	33.5789	0.505545
Broadleaved	102.1	27.43	2.28454	12.0855	5.77055	14.1	6.6	26.6	1049	1970.82	1357.2	72.3	7.46269	55	NA	0.66	7	2014	Literatures	Si et al., 2014	Southwest latitudinal zone	321.24	237.807	74.0279	83.4327	25.9721	0.350842
Broadleaved	114.23	27.25	1.65943	13.8278	4.72345	17.7	5.9	28.9	1553	1670.96	1770	24.97	21.6	34.423	NA	1.3	7	2017	Literatures	Hu et al., 2017	Quxi	429.82	357.663	83.2124	72.1565	16.7876	0.201744
Broadleaved	102.02	26.97	2.12508	12.4591	5.70733	16.8	1.6	20.3	1038	1940.83	1634	36.5	6	49	NA	0.66	7	2014	Literatures	Yang et al., 2014	Miyi	279.66	206.473	73.8299	73.1874	26.1701	0.354465
Broadleaved	113.75	26.65	1.61817	14.0567	4.68565	17.9	5.9	29.2	1410	1651.2	1180	27.88	21.26	36.11	NA	1.05	7	2017	Literatures	Hu et al., 2017	Quxi	352.67	263.027	74.5817	89.6425	25.4183	0.340811
Broadleaved	102.08	26.5	2.33595	12.3266	5.66411	13.8	4.8	29.8	1160	1933.48	1256	65.28	7.8125	67.8632	NA	1.31	7	2014	Literatures	Si et al., 2014	Southwest latitudinal zone	290.97	217.509	74.7531	73.4608	25.2469	0.337737
Broadleaved	105.7	26.48	2.00664	13.0352	5.34321	15.1	5.7	20.9	1390	1835.49	1876	11.7	16.66	39.6464	NA	1.4	7	2009	Literatures	Zhong et al., 2009	Guizhou Puding	376.9	305.418	81.0342	71.4819	18.9658	0.234046
Broadleaved	105.7	26.48	2.04019	12.9882	5.34615	15.1	5.7	20.9	1390	1837.84	1876	18.33	15.07	56	NA	1.4	7	2009	Literatures	Zhong et al., 2009	Guizhou Puding	376.9	305.418	81.0342	71.4819	18.9658	0.234046
Broadleaved	106.69	26.38	1.87146	13.3242	5.24007	16.2	4.8	27.5	1277	1801.33	1523	38.06	15.91	37.2	NA	0.419018	7	2019	Literatures	Cheng et al., 2019	karst region	340.38	285.485	83.8723	54.8953	16.1277	0.192288
Broadleaved	114.38	26.35	1.63629	14.1746	4.60052	17.5	6.2	28.2	1421	1626.25	1256	26.75	28.65	32.662	NA	1.05536	7	2017	Literatures	Hu et al., 2017	Quxi	411.58	332.071	80.6821	79.5087	19.3179	0.239433
Broadleaved	105.82	26.13	1.93415	13.2631	5.28491	16.2	4.8	27.5	1277	1812.39	1523	59.92	14.8	35.1	NA	1.1	7	2019	Literatures	Cheng et al., 2019	karst region	364.53	288.294	79.0866	76.2355	20.9134	0.264436
Broadleaved	119.5	26	1.83719	14.3515	4.16606	19.3	2.5	29.7	1100	1520.06	2312	8.9	13.2	28.7	NA	0.6	6	2018	Literatures	Zhang et al., 2018	lang qi island	415.54	326.352	78.5369	89.1877	21.4631	0.273287
Broadleaved	119.5	26	1.83719	14.3515	4.16606	19.3	2.5	29.7	1100	1520.06	2312	34.1	14.3	35.2	NA	1.4	6	2018	Literatures	Zhang et al., 2018	lang qi island	415.54	326.352	78.5369	89.1877	21.4631	0.273287
Broadleaved	119.5	26	1.83719	14.3515	4.16606	19.3	2.5	29.7	1100	1520.06	2312	11.2	13.5	32.3	NA	1.4	6	2018	Literatures	Zhang et al., 2018	lang qi island	415.54	326.352	78.5369	89.1877	21.4631	0.273287
Broadleaved	119.5	26	1.83719	14.3515	4.16606	19.3	2.5	29.7	1100	1520.06	2312	72.3	13.3	33.1	NA	0.6	6	2018	Literatures	Zhang et al., 2018	lang qi island	415.54	326.352	78.5369	89.1877	21.4631	0.273287
Broadleaved	101.97	25.64	2.27954	12.6892	5.56391	15.6	1.4	18.7	925	1893.54	1245	37	4.9	52	NA	0.88	7	2014	Literatures	Yang et al., 2014	Wuding	340.48	270.469	79.4376	70.011	20.5624	0.25885
Broadleaved	101.09	25.62	2.69829	12.0508	5.66855	12.1	-1.5	17.3	1035	1939.98	1934	33	4.8	51	NA	1.2	7	2014	Literatures	Yang et al., 2014	Yaoan	347.54	271.123	78.0119	76.4174	21.9881	0.281856
Broadleaved	102.4	25.53	2.43655	12.535	5.52993	12.1	4.2	26.4	1008.6	1890.85	2086	22.6	8.33333	34	NA	0.579317	7	2014	Literatures	Si et al., 2014	Southwest latitudinal zone	385.24	283.376	73.5583	101.864	26.4417	0.359466
Broadleaved	101.42	25.31	2.43639	12.5445	5.58171	14.2	0.5	17.8	986	1901.1	1635	38	5	43.5	NA	1.4	7	2014	Literatures	Yang et al., 2014	Mouding	344.51	270.624	78.5534	73.8857	21.4466	0.27302
Broadleaved	113.54	25.14	1.83537	14.2491	4.53874	19.7	3.8	26.6	1665	1603.58	1200	32.87	23.86	34.551	NA	0.6	7	2017	Literatures	Liu et al., 2017	Quxi	413.7	309.503	74.8134	104.197	25.1866	0.336658
Broadleaved	110.46	25.1	1.33776	14.7553	4.73681	18.5	8	28	1856.7	1629.92	1458.4	28.9	33.7	32	NA	0.65	7	2017	Literatures	Liu et al., 2017	Guilin Karst stone mountains	342.1	271.909	79.4822	70.1913	20.5178	0.258143
Broadleaved	110.46	25.1	1.33776	14.7553	4.73681	18.5	8	28	1856.7	1629.92	1458.4	25	35	35.453	NA	1.2	7	2017	Literatures	Liu et al., 2017	Guilin Karst stone mountains	342.1	271.909	79.4822	70.1913	20.5178	0.258143
Broadleaved	102.6	24.93	2.35687	12.8628	5.43435	13.1	6.9	27.8	1035.3	1854.5	1256	50.9	8.13008	34.2	NA	0.971703	7	2014	Literatures	Si et al., 2014	Southwest latitudinal zone	391.89	244.751	62.4539	147.139	37.5461	0.601181
Broadleaved	110.51	24.91	1.41087	14.7204	4.71622	18.9	7.8	28	1949.5	1625.58	1700	28.374	16.51	32.3	NA	1.2	7	2017	Literatures	Liu et al., 2017	Guilin	390.62	300.293	76.8761	90.3266	23.1239	0.300795
Broadleaved	99.58	24.83	2.08943	13.0708	5.6405	15	1	19.5	1051	1893.08	1834	40	7.3	47	NA	0.6	7	2014	Literatures	Yang et al., 2014	Changning	361.31	269.491	74.5873	91.8187	25.4127	0.340711
Broadleaved	110.367	24.8083	1.40105	14.759	4.71453	19	8	28	1900	1623.3	1458.4	90.24	20.3	35.453	NA	1.2	5	2012	Literatures	Liu et al., 2012	North Guangxi karst area	341.98	262.471	76.7503	79.5095	23.2497	0.302927
Broadleaved	103.333	24.8	2.24502	13.1122	5.35018	16.2	8.2	32.4	967.9	1825.9	2086	23.69	7.043	41	NA	1.37	8	2018	Literatures	Li et al., 2018	Shilin Yi Autonomous	342.63	231.395	67.5349	111.235	32.4651	0.480715
Broadleaved	103.333	24.8	2.24502	13.1122	5.35018	16.2	8.2	32.4	967.9	1825.9	2086	47.3	7.61	47	NA	1.53	8	2018	Literatures	Li et al., 2018	Shilin Yi Autonomous	342.63	231.395	67.5349	111.235	32.4651	0.480715
Broadleaved	103.333	24.8	2.24502	13.1122	5.35018	16.2	8.2	32.4	967.9	1825.9	2086	6.62	10.177	52	NA	1.68203	8	2018	Literatures	Li et al., 2018	Shilin Yi Autonomous	342.63	231.395	67.5349	111.235	32.4651	0.480715
Broadleaved	103.333	24.8	2.24502	13.1122	5.35018	16.2	8.2	32.4	967.9	1825.9	2086	20.62	11.107	37	NA	1.37	8	2018	Literatures	Li et al., 2018	Shilin Yi Autonomous	342.63	231.395	67.5349	111.235	32.4651	0.480715
Broadleaved	103.333	24.8	2.24502	13.1122	5.35018	16.2	8.2	32.4	967.9	1825.9	2086	16.83	9.854	34	NA	1.37	8	2018	Literatures	Li et al., 2018	Shilin Yi Autonomous	342.63	231.395	67.5349	111.235	32.4651	0.480715
Broadleaved	103.333	24.8	2.24502	13.1122	5.35018	16.2	8.2	32.4	967.9	1825.9	2086	29.07	4.668	44	NA	2.57791	8	2018	Literatures	Li et al., 2018	Shilin Yi Autonomous	342.63	231.395	67.5349	111.235	32.4651	0.480715
Broadleaved	103.333	24.8	2.24502	13.1122	5.35018	16.2	8.2	32.4	967.9	1825.9	2086	24.65	10.044	47	NA	2.57791	8	2018	Literatures	Li et al., 2018	Shilin Yi Autonomous	342.63	231.395	67.5349	111.235	32.4651	0.480715
Broadleaved	103.333	24.8	2.24502	13.1122	5.35018	16.2	8.2	32.4	967.9	1825.9	2086	21.78	4.816	51	NA	1.68203	8	2018	Literatures	Li et al., 2018	Shilin Yi Autonomous	342.63	231.395	67.5349	111.235	32.4651	0.480715
Broadleaved	103.333	24.8	2.24502	13.1122	5.35018	16.2	8.2	32.4	967.9	1825.9	2086	4.66	8.896	52	NA	2.2	8	2018	Literatures	Li et al., 2018	Shilin Yi Autonomous	342.63	231.395	67.5349	111.235	32.4651	0.480715
Broadleaved	103.333	24.8	2.24502	13.1122	5.35018	16.2	8.2	32.4	967.9	1825.9	2086	86.65	9.571	50	NA	1.05	8	2018	Literatures	Li et al., 2018	Shilin Yi Autonomous	342.63	231.395	67.5349	111.235	32.4651	0.480715
Broadleaved	103.333	24.8	2.24502	13.1122	5.35018	16.2	8.2	32.4	967.9	1825.9	2086	8.65	9.34	66	NA	1.31	8	2018	Literatures	Li et al., 2018	Shilin Yi Autonomous	342.63	231.395	67.5349	111.235	32.4651	0.480715
Broadleaved	103.333	24.8	2.24502	13.1122	5.35018	16.2	8.2	32.4	967.9	1825.9	2086	38.52	9.307	46	NA	1.48	8	2018	Literatures	Li et al., 2018	Shilin Yi Autonomous	342.63	231.395	67.5349	111.235	32.4651	0.480715
Broadleaved	103.333	24.8	2.24502	13.1122	5.35018	16.2	8.2	32.4	967.9	1825.9	2086	55.95	7.437	55	NA	1.525	8	2018	Literatures	Li et al., 2018	Shilin Yi Autonomous	342.63	231.395	67.5349	111.235	32.4651	0.480715
Broadleaved	103.333	24.8	2.24502	13.1122	5.35018	16.2	8.2	32.4	967.9	1825.9	2086	28.52	9.02	44	NA	2.57791	8	2018	Literatures	Li et al., 2018	Shilin Yi Autonomous	342.63	231.395	67.5349	111.235	32.4651	0.480715
Broadleaved	103.333	24.8	2.24502	13.1122	5.35018	16.2	8.2	32.4	967.9	1825.9	2086	58.83	10.137	45	NA	1.76	8	2018	Literatures	Li et al., 2018	Shilin Yi Autonomous	342.63	231.395	67.5349	111.235	32.4651	0.480715
Broadleaved	103.333	24.8	2.24502	13.1122	5.35018	16.2	8.2	32.4	967.9	1825.9	2086	70.64	9.242	56	NA	1.44	8	2018	Literatures	Li et al., 2018	Shilin Yi Autonomous	342.63	231.395	67.5349	111.235	32.4651	0.480715
Broadleaved	103.333	24.8	2.24502	13.1122	5.35018	16.2	8.2	32.4	967.9	1825.9	2086	25.83	12.881	36	NA	1.48	8	2018	Literatures	Li et al., 2018	Shilin Yi Autonomous	342.63	231.395	67.5349	111.235	32.4651	0.480715
Broadleaved	103.333	24.8	2.24502	13.1122	5.35018	16.2	8.2	32.4	967.9	1825.9	2086	73.1	13.724	41	NA	1.76633	8	2018	Literatures	Li et al., 2018	Shilin Yi Autonomous	342.63	231.395	67.5349	111.235	32.4651	0.480715
Broadleaved	103.333	24.8	2.24502	13.1122	5.35018	16.2	8.2	32.4	967.9	1825.9	2086	7.4	9.682	47	NA	1.44	8	2018	Literatures	Li et al., 2018	Shilin Yi Autonomous	342.63	231.395	67.5349	111.235	32.4651	0.480715
Broadleaved	103.333	24.8	2.24502	13.1122	5.35018	16.2	8.2	32.4	967.9	1825.9	2086	25.57	10.37	42	NA	1.46	8	2018	Literatures	Li et al., 2018	Shilin Yi Autonomous	342.63	231.395	67.5349	111.235	32.4651	0.480715
Broadleaved	113	24.5	1.61737	14.7351	4.48543	20.7	8.7	27.1	1900	1570.89	1478	31.49	20.2	33.165	NA	0.65	7	2017	Literatures	Hu et al., 2017	Quxi	379.21	295.24	77.8566	83.97	22.1434	0.284413
Broadleaved	106.394	24.488	0.84	12	3.43	13.7	4.7	20.7	1657.2	1540.4	578.2	17.03	9.454	39	NA	0.54	8	2017	Literatures	Liang et al., 2017	Cenwang Old Mountain Reserve	345.43	242.699	70.2599	102.731	29.7401	0.423288
Broadleaved	106.394	24.488	0.84	12	3.43	13.7	4.7	20.7	1657.2	1540.4	578.2	30.41	13.69	33	NA	0.54	8	2017	Literatures	Liang et al., 2017	Cenwang Old Mountain Reserve	345.43	242.699	70.2599	102.731	29.7401	0.423288
Broadleaved	106.394	24.488	0.84	12	3.43	13.7	4.7	20.7	1657.2	1540.4	578.2	19.9	12.9	41	NA	1.67	8	2017	Literatures	Liang et al., 2017	Cenwang Old Mountain Reserve	345.43	242.699	70.2599	102.731	29.7401	0.423288
Broadleaved	106.394	24.488	0.84	12	3.43	13.7	4.7	20.7	1657.2	1540.4	578.2	66.11	14.56	42	NA	0.54	8	2017	Literatures	Liang et al., 2017	Cenwang Old Mountain Reserve	345.43	242.699	70.2599	102.731	29.7401	0.423288
Broadleaved	106.394	24.488	0.84	12	3.43	13.7	4.7	20.7	1657.2	1540.4	578.2	21.32	9.83	37	NA	0.66	8	2017	Literatures	Liang et al., 2017	Cenwang Old Mountain Reserve	345.43	242.699	70.2599	102.731	29.7401	0.423288
Broadleaved	106.394	24.488	0.84	12	3.43	13.7	4.7	20.7	1657.2	1540.4	578.2	106.07	13.39	29.1	NA	0.4	8	2017	Literatures	Liang et al., 2017	Cenwang Old Mountain Reserve	345.43	242.699	70.2599	102.731	29.7401	0.423288
Broadleaved	106.394	24.488	0.84	12	3.43	13.7	4.7	20.7	1657.2	1540.4	578.2	45.54	8.778	47.3	NA	0.58	8	2017	Literatures	Liang et al., 2017	Cenwang Old Mountain Reserve	345.43	242.699	70.2599	102.731	29.7401	0.423288
Broadleaved	106.394	24.488	0.84	12	3.43	13.7	4.7	20.7	1657.2	1540.4	578.2	34.58	16.932	26.4	NA	1.9	8	2017	Literatures	Liang et al., 2017	Cenwang Old Mountain Reserve	345.43	242.699	70.2599	102.731	29.7401	0.423288
Broadleaved	106.394	24.488	0.84	12	3.43	13.7	4.7	20.7	1657.2	1540.4	578.2	52.07	17.673	4.12	NA	1.73235	8	2017	Literatures	Liang et al., 2017	Cenwang Old Mountain Reserve	345.43	242.699	70.2599	102.731	29.7401	0.423288
Broadleaved	106.394	24.488	0.84	12	3.43	13.7	4.7	20.7	1657.2	1540.4	578.2	50.06	15.48	24.5	NA	1.9543	8	2017	Literatures	Liang et al., 2017	Cenwang Old Mountain Reserve	345.43	242.699	70.2599	102.731	29.7401	0.423288
Broadleaved	106.394	24.488	0.84	12	3.43	13.7	4.7	20.7	1657.2	1540.4	578.2	22.4	12.708	37.3	NA	1.9543	8	2017	Literatures	Liang et al., 2017	Cenwang Old Mountain Reserve	345.43	242.699	70.2599	102.731	29.7401	0.423288
Broadleaved	106.394	24.488	0.84	12	3.43	13.7	4.7	20.7	1657.2	1540.4	578.2	25.34	8.933	41.3	NA	0.48	8	2017	Literatures	Liang et al., 2017	Cenwang Old Mountain Reserve	345.43	242.699	70.2599	102.731	29.7401	0.423288
Broadleaved	106.394	24.488	0.84	12	3.43	13.7	4.7	20.7	1657.2	1540.4	578.2	12.7	8.658	38.2	NA	0.54	8	2017	Literatures	Liang et al., 2017	Cenwang Old Mountain Reserve	345.43	242.699	70.2599	102.731	29.7401	0.423288
Broadleaved	106.394	24.488	0.84	12	3.43	13.7	4.7	20.7	1657.2	1540.4	578.2	15.76	10.35	32.1	NA	0.66	8	2017	Literatures	Liang et al., 2017	Cenwang Old Mountain Reserve	345.43	242.699	70.2599	102.731	29.7401	0.423288
Broadleaved	106.394	24.488	0.84	12	3.43	13.7	4.7	20.7	1657.2	1540.4	578.2	21.45	7.585	39.2	NA	1.22981	8	2017	Literatures	Liang et al., 2017	Cenwang Old Mountain Reserve	345.43	242.699	70.2599	102.731	29.7401	0.423288
Broadleaved	106.394	24.488	0.84	12	3.43	13.7	4.7	20.7	1657.2	1540.4	578.2	37.36	14.15	32.5	NA	1.22981	8	2017	Literatures	Liang et al., 2017	Cenwang Old Mountain Reserve	345.43	242.699	70.2599	102.731	29.7401	0.423288
Broadleaved	106.394	24.488	0.84	12	3.43	13.7	4.7	20.7	1657.2	1540.4	578.2	20.38	13.396	38.1	NA	0.54	8	2017	Literatures	Liang et al., 2017	Cenwang Old Mountain Reserve	345.43	242.699	70.2599	102.731	29.7401	0.423288
Broadleaved	106.394	24.488	0.84	12	3.43	13.7	4.7	20.7	1657.2	1540.4	578.2	11.47	9.112	34.2	NA	1.9	8	2017	Literatures	Liang et al., 2017	Cenwang Old Mountain Reserve	345.43	242.699	70.2599	102.731	29.7401	0.423288
Broadleaved	106.394	24.488	0.84	12	3.43	13.7	4.7	20.7	1657.2	1540.4	578.2	34.73	22.5	34.4	NA	0.66	8	2017	Literatures	Liang et al., 2017	Cenwang Old Mountain Reserve	345.43	242.699	70.2599	102.731	29.7401	0.423288
Broadleaved	106.394	24.488	0.84	12	3.43	13.7	4.7	20.7	1657.2	1540.4	578.2	22.42	7.402	46.4	NA	0.58	8	2017	Literatures	Liang et al., 2017	Cenwang Old Mountain Reserve	345.43	242.699	70.2599	102.731	29.7401	0.423288
Broadleaved	106.394	24.488	0.84	12	3.43	13.7	4.7	20.7	1657.2	1540.4	578.2	15.58	10.2	51.2	NA	1.7	8	2017	Literatures	Liang et al., 2017	Cenwang Old Mountain Reserve	345.43	242.699	70.2599	102.731	29.7401	0.423288
Broadleaved	106.394	24.488	0.84	12	3.43	13.7	4.7	20.7	1657.2	1540.4	578.2	35.97	12.05	40.2	NA	2.2	8	2017	Literatures	Liang et al., 2017	Cenwang Old Mountain Reserve	345.43	242.699	70.2599	102.731	29.7401	0.423288
Broadleaved	106.394	24.488	0.84	12	3.43	13.7	4.7	20.7	1657.2	1540.4	578.2	17.03	9.454	39	NA	0.66	8	2017	Literatures	Liang et al., 2017	Cenwang Old Mountain Reserve	345.43	242.699	70.2599	102.731	29.7401	0.423288
Broadleaved	106.395	24.484	0.86	16	3.4	14.3	5.1	20.9	1721	1540.4	567	16.26	9.048	41.1	NA	0.54	8	2017	Literatures	Liang et al., 2017	Cenwang Old Mountain Reserve	398.86	280.238	70.2599	118.622	29.7401	0.423288
Broadleaved	106.395	24.484	0.86	16	3.4	14.3	5.1	20.9	1721	1540.4	567	10.39	11.18	25.7	NA	0.41	8	2017	Literatures	Liang et al., 2017	Cenwang Old Mountain Reserve	398.86	280.238	70.2599	118.622	29.7401	0.423288
Broadleaved	106.395	24.484	0.86	16	3.4	14.3	5.1	20.9	1721	1540.4	567	18.97	15.69	37.4	NA	0.966846	8	2017	Literatures	Liang et al., 2017	Cenwang Old Mountain Reserve	398.86	280.238	70.2599	118.622	29.7401	0.423288
Broadleaved	106.395	24.484	0.86	16	3.4	14.3	5.1	20.9	1721	1540.4	567	16.11	13.038	44.2	NA	0.54	8	2017	Literatures	Liang et al., 2017	Cenwang Old Mountain Reserve	398.86	280.238	70.2599	118.622	29.7401	0.423288
Broadleaved	106.395	24.484	0.86	16	3.4	14.3	5.1	20.9	1721	1540.4	567	17.87	13.25	37.3	NA	1.25	8	2017	Literatures	Liang et al., 2017	Cenwang Old Mountain Reserve	398.86	280.238	70.2599	118.622	29.7401	0.423288
Broadleaved	106.395	24.484	0.86	16	3.4	14.3	5.1	20.9	1721	1540.4	567	88.65	10.002	46.5	NA	1.80664	8	2017	Literatures	Liang et al., 2017	Cenwang Old Mountain Reserve	398.86	280.238	70.2599	118.622	29.7401	0.423288
Broadleaved	106.395	24.484	0.86	16	3.4	14.3	5.1	20.9	1721	1540.4	567	16.36	11.105	36.2	NA	1.04959	8	2017	Literatures	Liang et al., 2017	Cenwang Old Mountain Reserve	398.86	280.238	70.2599	118.622	29.7401	0.423288
Broadleaved	106.395	24.484	0.86	16	3.4	14.3	5.1	20.9	1721	1540.4	567	18.1	16.98	36.3	NA	1.53552	8	2017	Literatures	Liang et al., 2017	Cenwang Old Mountain Reserve	398.86	280.238	70.2599	118.622	29.7401	0.423288
Broadleaved	106.395	24.484	0.86	16	3.4	14.3	5.1	20.9	1721	1540.4	567	36.34	16.23	34.4	NA	1.3	8	2017	Literatures	Liang et al., 2017	Cenwang Old Mountain Reserve	398.86	280.238	70.2599	118.622	29.7401	0.423288
Broadleaved	106.395	24.484	0.86	16	3.4	14.3	5.1	20.9	1721	1540.4	567	18.51	13.33	35	NA	1.76	8	2017	Literatures	Liang et al., 2017	Cenwang Old Mountain Reserve	398.86	280.238	70.2599	118.622	29.7401	0.423288
Broadleaved	106.395	24.484	0.86	16	3.4	14.3	5.1	20.9	1721	1540.4	567	59.4	16.19	30.4	NA	1.41	8	2017	Literatures	Liang et al., 2017	Cenwang Old Mountain Reserve	398.86	280.238	70.2599	118.622	29.7401	0.423288
Broadleaved	106.395	24.484	0.86	16	3.4	14.3	5.1	20.9	1721	1540.4	567	29.54	11.503	53.4	NA	1.38	8	2017	Literatures	Liang et al., 2017	Cenwang Old Mountain Reserve	398.86	280.238	70.2599	118.622	29.7401	0.423288
Broadleaved	106.395	24.484	0.86	16	3.4	14.3	5.1	20.9	1721	1540.4	567	47.69	7.379	46.1	NA	0.419018	8	2017	Literatures	Liang et al., 2017	Cenwang Old Mountain Reserve	398.86	280.238	70.2599	118.622	29.7401	0.423288
Broadleaved	106.395	24.484	0.86	16	3.4	14.3	5.1	20.9	1721	1540.4	567	17.26	8.3	49.6	NA	1.38	8	2017	Literatures	Liang et al., 2017	Cenwang Old Mountain Reserve	398.86	280.238	70.2599	118.622	29.7401	0.423288
Broadleaved	106.395	24.484	0.86	16	3.4	14.3	5.1	20.9	1721	1540.4	567	44.52	24.8	21.3	NA	1.95528	8	2017	Literatures	Liang et al., 2017	Cenwang Old Mountain Reserve	398.86	280.238	70.2599	118.622	29.7401	0.423288
Broadleaved	106.395	24.484	0.86	16	3.4	14.3	5.1	20.9	1721	1540.4	567	29.34	9.824	44	NA	1.42	8	2017	Literatures	Liang et al., 2017	Cenwang Old Mountain Reserve	398.86	280.238	70.2599	118.622	29.7401	0.423288
Broadleaved	106.395	24.484	0.86	16	3.4	14.3	5.1	20.9	1721	1540.4	567	26.15	23.98	27.5	NA	2.4	8	2017	Literatures	Liang et al., 2017	Cenwang Old Mountain Reserve	398.86	280.238	70.2599	118.622	29.7401	0.423288
Broadleaved	106.395	24.484	0.86	16	3.4	14.3	5.1	20.9	1721	1540.4	567	26.81	15.22	33.3	NA	1.81543	8	2017	Literatures	Liang et al., 2017	Cenwang Old Mountain Reserve	398.86	280.238	70.2599	118.622	29.7401	0.423288
Broadleaved	106.395	24.484	0.86	16	3.4	14.3	5.1	20.9	1721	1540.4	567	27.28	11.86	37.9	NA	1.86	8	2017	Literatures	Liang et al., 2017	Cenwang Old Mountain Reserve	398.86	280.238	70.2599	118.622	29.7401	0.423288
Broadleaved	106.395	24.484	0.86	16	3.4	14.3	5.1	20.9	1721	1540.4	567	20.78	9.055	36.3	NA	1.04669	8	2017	Literatures	Liang et al., 2017	Cenwang Old Mountain Reserve	398.86	280.238	70.2599	118.622	29.7401	0.423288
Broadleaved	106.395	24.484	0.86	16	3.4	14.3	5.1	20.9	1721	1540.4	567	18.45	11.05	32.3	NA	2.04	8	2017	Literatures	Liang et al., 2017	Cenwang Old Mountain Reserve	398.86	280.238	70.2599	118.622	29.7401	0.423288
Broadleaved	106.395	24.484	0.86	16	3.4	14.3	5.1	20.9	1721	1540.4	567	25.32	22.99	44.2	NA	1.37512	8	2017	Literatures	Liang et al., 2017	Cenwang Old Mountain Reserve	398.86	280.238	70.2599	118.622	29.7401	0.423288
Broadleaved	106.395	24.484	0.86	16	3.4	14.3	5.1	20.9	1721	1540.4	567	24.39	8.963	41.2	NA	1.26	8	2017	Literatures	Liang et al., 2017	Cenwang Old Mountain Reserve	398.86	280.238	70.2599	118.622	29.7401	0.423288
Broadleaved	106.395	24.484	0.86	16	3.4	14.3	5.1	20.9	1721	1540.4	567	30.46	12.93	52.2	NA	0.419018	8	2017	Literatures	Liang et al., 2017	Cenwang Old Mountain Reserve	398.86	280.238	70.2599	118.622	29.7401	0.423288
Broadleaved	106.395	24.484	0.86	16	3.4	14.3	5.1	20.9	1721	1540.4	567	68.38	20.56	36.2	NA	1.81543	8	2017	Literatures	Liang et al., 2017	Cenwang Old Mountain Reserve	398.86	280.238	70.2599	118.622	29.7401	0.423288
Broadleaved	106.395	24.484	0.86	16	3.4	14.3	5.1	20.9	1721	1540.4	567	24.03	15.097	36.2	NA	1.52	8	2017	Literatures	Liang et al., 2017	Cenwang Old Mountain Reserve	398.86	280.238	70.2599	118.622	29.7401	0.423288
Broadleaved	106.395	24.484	0.86	16	3.4	14.3	5.1	20.9	1721	1540.4	567	90.24	18.76	48.5	NA	1.71876	8	2017	Literatures	Liang et al., 2017	Cenwang Old Mountain Reserve	398.86	280.238	70.2599	118.622	29.7401	0.423288
Broadleaved	106.395	24.484	0.86	16	3.4	14.3	5.1	20.9	1721	1540.4	567	44.06	18.06	34.3	NA	1.92	8	2017	Literatures	Liang et al., 2017	Cenwang Old Mountain Reserve	398.86	280.238	70.2599	118.622	29.7401	0.423288
Broadleaved	106.395	24.484	0.86	16	3.4	14.3	5.1	20.9	1721	1540.4	567	33.35	25.54	32.1	NA	0.971703	8	2017	Literatures	Liang et al., 2017	Cenwang Old Mountain Reserve	398.86	280.238	70.2599	118.622	29.7401	0.423288
Broadleaved	106.395	24.484	0.86	16	3.4	14.3	5.1	20.9	1721	1540.4	567	13.39	13.22	43.9	NA	1.79471	8	2017	Literatures	Liang et al., 2017	Cenwang Old Mountain Reserve	398.86	280.238	70.2599	118.622	29.7401	0.423288
Broadleaved	106.395	24.484	0.86	16	3.4	14.3	5.1	20.9	1721	1540.4	567	33.06	16.506	28.2	NA	2.70145	8	2017	Literatures	Liang et al., 2017	Cenwang Old Mountain Reserve	398.86	280.238	70.2599	118.622	29.7401	0.423288
Broadleaved	106.395	24.484	0.86	16	3.4	14.3	5.1	20.9	1721	1540.4	567	25.91	25.59	30.5	NA	1.52	8	2017	Literatures	Liang et al., 2017	Cenwang Old Mountain Reserve	398.86	280.238	70.2599	118.622	29.7401	0.423288
Broadleaved	106.395	24.484	0.86	16	3.4	14.3	5.1	20.9	1721	1540.4	567	27.83	9.721	45.1	NA	1.55	8	2017	Literatures	Liang et al., 2017	Cenwang Old Mountain Reserve	398.86	280.238	70.2599	118.622	29.7401	0.423288
Broadleaved	106.395	24.484	0.86	16	3.4	14.3	5.1	20.9	1721	1540.4	567	23.57	8.017	41.2	NA	1.60328	8	2017	Literatures	Liang et al., 2017	Cenwang Old Mountain Reserve	398.86	280.238	70.2599	118.622	29.7401	0.423288
Broadleaved	106.395	24.484	0.86	16	3.4	14.3	5.1	20.9	1721	1540.4	567	20.74	15.794	35.2	NA	0.66	8	2017	Literatures	Liang et al., 2017	Cenwang Old Mountain Reserve	398.86	280.238	70.2599	118.622	29.7401	0.423288
Broadleaved	106.395	24.484	0.86	16	3.4	14.3	5.1	20.9	1721	1540.4	567	27.73	16.1	33.1	NA	2	8	2017	Literatures	Liang et al., 2017	Cenwang Old Mountain Reserve	398.86	280.238	70.2599	118.622	29.7401	0.423288
Broadleaved	106.395	24.484	0.86	16	3.4	14.3	5.1	20.9	1721	1540.4	567	14.94	12.2	52.3	NA	0.97	8	2017	Literatures	Liang et al., 2017	Cenwang Old Mountain Reserve	398.86	280.238	70.2599	118.622	29.7401	0.423288
Broadleaved	106.395	24.484	0.86	16	3.4	14.3	5.1	20.9	1721	1540.4	567	65.6	15.77	42.5	NA	1.3504	8	2017	Literatures	Liang et al., 2017	Cenwang Old Mountain Reserve	398.86	280.238	70.2599	118.622	29.7401	0.423288
Broadleaved	106.395	24.484	0.86	16	3.4	14.3	5.1	20.9	1721	1540.4	567	29.17	10.32	47.3	NA	2.57791	8	2017	Literatures	Liang et al., 2017	Cenwang Old Mountain Reserve	398.86	280.238	70.2599	118.622	29.7401	0.423288
Broadleaved	106.395	24.484	0.86	16	3.4	14.3	5.1	20.9	1721	1540.4	567	39.17	11.99	42.1	NA	0.579317	8	2017	Literatures	Liang et al., 2017	Cenwang Old Mountain Reserve	398.86	280.238	70.2599	118.622	29.7401	0.423288
Broadleaved	106.395	24.484	0.86	16	3.4	14.3	5.1	20.9	1721	1540.4	567	13.28	12.15	43.2	NA	1.31	8	2017	Literatures	Liang et al., 2017	Cenwang Old Mountain Reserve	398.86	280.238	70.2599	118.622	29.7401	0.423288
Broadleaved	106.395	24.484	0.86	16	3.4	14.3	5.1	20.9	1721	1540.4	567	15.28	19.45	40.2	NA	1.76	8	2017	Literatures	Liang et al., 2017	Cenwang Old Mountain Reserve	398.86	280.238	70.2599	118.622	29.7401	0.423288
Broadleaved	106.395	24.484	0.86	16	3.4	14.3	5.1	20.9	1721	1540.4	567	14.73	10.509	52.1	NA	1.47732	8	2017	Literatures	Liang et al., 2017	Cenwang Old Mountain Reserve	398.86	280.238	70.2599	118.622	29.7401	0.423288
Broadleaved	106.358	24.445	0.92	21	3.35	16.2	5.8	21.6	1756	1540.4	550	19.38	13.2	36.1	NA	1.7	8	2017	Literatures	Liang et al., 2017	Cenwang Old Mountain Reserve	381.89	268.315	70.2599	113.575	29.7401	0.423288
Broadleaved	106.358	24.445	0.92	21	3.35	16.2	5.8	21.6	1756	1540.4	550	45.87	14.203	38.3	NA	1.12018	8	2017	Literatures	Liang et al., 2017	Cenwang Old Mountain Reserve	381.89	268.315	70.2599	113.575	29.7401	0.423288
Broadleaved	106.358	24.445	0.92	21	3.35	16.2	5.8	21.6	1756	1540.4	550	22.4	12.287	35.1	NA	2.72428	8	2017	Literatures	Liang et al., 2017	Cenwang Old Mountain Reserve	381.89	268.315	70.2599	113.575	29.7401	0.423288
Broadleaved	106.358	24.445	0.92	21	3.35	16.2	5.8	21.6	1756	1540.4	550	32.98	10.843	45.3	NA	2.72428	8	2017	Literatures	Liang et al., 2017	Cenwang Old Mountain Reserve	381.89	268.315	70.2599	113.575	29.7401	0.423288
Broadleaved	106.358	24.445	0.92	21	3.35	16.2	5.8	21.6	1756	1540.4	550	11.16	16.38	40.3	NA	2.70145	8	2017	Literatures	Liang et al., 2017	Cenwang Old Mountain Reserve	381.89	268.315	70.2599	113.575	29.7401	0.423288
Broadleaved	106.358	24.445	0.92	21	3.35	16.2	5.8	21.6	1756	1540.4	550	36.87	11.18	32.1	NA	2.55066	8	2017	Literatures	Liang et al., 2017	Cenwang Old Mountain Reserve	381.89	268.315	70.2599	113.575	29.7401	0.423288
Broadleaved	106.358	24.445	0.92	21	3.35	16.2	5.8	21.6	1756	1540.4	550	95.27	9.952	46.2	NA	1.604	8	2017	Literatures	Liang et al., 2017	Cenwang Old Mountain Reserve	381.89	268.315	70.2599	113.575	29.7401	0.423288
Broadleaved	106.358	24.445	0.92	21	3.35	16.2	5.8	21.6	1756	1540.4	550	42.3	21.908	29.2	NA	1.82	8	2017	Literatures	Liang et al., 2017	Cenwang Old Mountain Reserve	381.89	268.315	70.2599	113.575	29.7401	0.423288
Broadleaved	106.358	24.445	0.92	21	3.35	16.2	5.8	21.6	1756	1540.4	550	8.6	16.203	29.2	NA	1.44	8	2017	Literatures	Liang et al., 2017	Cenwang Old Mountain Reserve	381.89	268.315	70.2599	113.575	29.7401	0.423288
Broadleaved	106.358	24.445	0.92	21	3.35	16.2	5.8	21.6	1756	1540.4	550	65.28	22.99	32.2	NA	1.46638	8	2017	Literatures	Liang et al., 2017	Cenwang Old Mountain Reserve	381.89	268.315	70.2599	113.575	29.7401	0.423288
Broadleaved	106.358	24.445	0.92	21	3.35	16.2	5.8	21.6	1756	1540.4	550	22.33	12.45	42.1	NA	1.05	8	2017	Literatures	Liang et al., 2017	Cenwang Old Mountain Reserve	381.89	268.315	70.2599	113.575	29.7401	0.423288
Broadleaved	106.358	24.445	0.92	21	3.35	16.2	5.8	21.6	1756	1540.4	550	36.5	21.43	35.4	NA	1.18678	8	2017	Literatures	Liang et al., 2017	Cenwang Old Mountain Reserve	381.89	268.315	70.2599	113.575	29.7401	0.423288
Broadleaved	106.358	24.445	0.92	21	3.35	16.2	5.8	21.6	1756	1540.4	550	15.39	27.89	29.2	NA	0.805031	8	2017	Literatures	Liang et al., 2017	Cenwang Old Mountain Reserve	381.89	268.315	70.2599	113.575	29.7401	0.423288
Broadleaved	106.358	24.445	0.92	21	3.35	16.2	5.8	21.6	1756	1540.4	550	23.4	12.94	45	NA	1.79471	8	2017	Literatures	Liang et al., 2017	Cenwang Old Mountain Reserve	381.89	268.315	70.2599	113.575	29.7401	0.423288
Broadleaved	106.358	24.445	0.92	21	3.35	16.2	5.8	21.6	1756	1540.4	550	49.9	29.22	43.1	NA	0.911529	8	2017	Literatures	Liang et al., 2017	Cenwang Old Mountain Reserve	381.89	268.315	70.2599	113.575	29.7401	0.423288
Broadleaved	106.358	24.445	0.92	21	3.35	16.2	5.8	21.6	1756	1540.4	550	5.94	16.89	39.2	NA	1.60328	8	2017	Literatures	Liang et al., 2017	Cenwang Old Mountain Reserve	381.89	268.315	70.2599	113.575	29.7401	0.423288
Broadleaved	106.358	24.445	0.92	21	3.35	16.2	5.8	21.6	1756	1540.4	550	38.76	12.34	35.2	NA	0.805031	8	2017	Literatures	Liang et al., 2017	Cenwang Old Mountain Reserve	381.89	268.315	70.2599	113.575	29.7401	0.423288
Broadleaved	106.358	24.445	0.92	21	3.35	16.2	5.8	21.6	1756	1540.4	550	57.51	19.08	38.1	NA	1.2468	8	2017	Literatures	Liang et al., 2017	Cenwang Old Mountain Reserve	381.89	268.315	70.2599	113.575	29.7401	0.423288
Broadleaved	106.358	24.445	0.92	21	3.35	16.2	5.8	21.6	1756	1540.4	550	36.94	16.04	38.3	NA	3.02732	8	2017	Literatures	Liang et al., 2017	Cenwang Old Mountain Reserve	381.89	268.315	70.2599	113.575	29.7401	0.423288
Broadleaved	106.358	24.445	0.92	21	3.35	16.2	5.8	21.6	1756	1540.4	550	74.04	25.07	37.3	NA	1.42	8	2017	Literatures	Liang et al., 2017	Cenwang Old Mountain Reserve	381.89	268.315	70.2599	113.575	29.7401	0.423288
Broadleaved	106.358	24.445	0.92	21	3.35	16.2	5.8	21.6	1756	1540.4	550	27.52	23.096	37.1	NA	3.07756	8	2017	Literatures	Liang et al., 2017	Cenwang Old Mountain Reserve	381.89	268.315	70.2599	113.575	29.7401	0.423288
Broadleaved	106.358	24.445	0.92	21	3.35	16.2	5.8	21.6	1756	1540.4	550	26.3	15.14	33.2	NA	1.52	8	2017	Literatures	Liang et al., 2017	Cenwang Old Mountain Reserve	381.89	268.315	70.2599	113.575	29.7401	0.423288
Broadleaved	106.358	24.445	0.92	21	3.35	16.2	5.8	21.6	1756	1540.4	550	8.99	14.18	36.2	NA	1.79471	8	2017	Literatures	Liang et al., 2017	Cenwang Old Mountain Reserve	381.89	268.315	70.2599	113.575	29.7401	0.423288
Broadleaved	106.358	24.445	0.92	21	3.35	16.2	5.8	21.6	1756	1540.4	550	17.04	13.55	43.3	NA	0.845221	8	2017	Literatures	Liang et al., 2017	Cenwang Old Mountain Reserve	381.89	268.315	70.2599	113.575	29.7401	0.423288
Broadleaved	106.358	24.445	0.92	21	3.35	16.2	5.8	21.6	1756	1540.4	550	31.72	3.31	15.53	NA	2	8	2017	Literatures	Liang et al., 2017	Cenwang Old Mountain Reserve	381.89	268.315	70.2599	113.575	29.7401	0.423288
Broadleaved	106.358	24.445	0.92	21	3.35	16.2	5.8	21.6	1756	1540.4	550	7.36	18.76	35.2	NA	1.82	8	2017	Literatures	Liang et al., 2017	Cenwang Old Mountain Reserve	381.89	268.315	70.2599	113.575	29.7401	0.423288
Broadleaved	106.358	24.445	0.92	21	3.35	16.2	5.8	21.6	1756	1540.4	550	38	26.019	16	NA	0.982961	8	2017	Literatures	Liang et al., 2017	Cenwang Old Mountain Reserve	381.89	268.315	70.2599	113.575	29.7401	0.423288
Broadleaved	106.358	24.445	0.92	21	3.35	16.2	5.8	21.6	1756	1540.4	550	21.58	16.905	43.1	NA	3.02732	8	2017	Literatures	Liang et al., 2017	Cenwang Old Mountain Reserve	381.89	268.315	70.2599	113.575	29.7401	0.423288
Broadleaved	106.358	24.445	0.92	21	3.35	16.2	5.8	21.6	1756	1540.4	550	6.26	16.33	42.1	NA	1.36	8	2017	Literatures	Liang et al., 2017	Cenwang Old Mountain Reserve	381.89	268.315	70.2599	113.575	29.7401	0.423288
Broadleaved	106.379	24.405	0.9	19	3.38	15.6	5.5	21.3	1734	1540.4	560	11.27	12.016	37.4	NA	2.21311	8	2017	Literatures	Liang et al., 2017	Cenwang Old Mountain Reserve	363.56	252.652	69.4938	110.908	30.5062	0.438977
Broadleaved	106.379	24.405	0.9	19	3.38	15.6	5.5	21.3	1734	1540.4	560	10.12	12.67	41.3	NA	1.53552	8	2017	Literatures	Liang et al., 2017	Cenwang Old Mountain Reserve	363.56	252.652	69.4938	110.908	30.5062	0.438977
Broadleaved	106.379	24.405	0.9	19	3.38	15.6	5.5	21.3	1734	1540.4	560	43.12	14.566	29.5	NA	1.5	8	2017	Literatures	Liang et al., 2017	Cenwang Old Mountain Reserve	363.56	252.652	69.4938	110.908	30.5062	0.438977
Broadleaved	106.379	24.405	0.9	19	3.38	15.6	5.5	21.3	1734	1540.4	560	23.79	21.9	37.1	NA	3.02732	8	2017	Literatures	Liang et al., 2017	Cenwang Old Mountain Reserve	363.56	252.652	69.4938	110.908	30.5062	0.438977
Broadleaved	106.379	24.405	0.9	19	3.38	15.6	5.5	21.3	1734	1540.4	560	10.97	15.317	30.3	NA	1.42	8	2017	Literatures	Liang et al., 2017	Cenwang Old Mountain Reserve	363.56	252.652	69.4938	110.908	30.5062	0.438977
Broadleaved	106.379	24.405	0.9	19	3.38	15.6	5.5	21.3	1734	1540.4	560	68.84	21.537	31.2	NA	2.2	8	2017	Literatures	Liang et al., 2017	Cenwang Old Mountain Reserve	363.56	252.652	69.4938	110.908	30.5062	0.438977
Broadleaved	106.379	24.405	0.9	19	3.38	15.6	5.5	21.3	1734	1540.4	560	30.94	11.909	48.2	NA	0.73	8	2017	Literatures	Liang et al., 2017	Cenwang Old Mountain Reserve	363.56	252.652	69.4938	110.908	30.5062	0.438977
Broadleaved	106.379	24.405	0.9	19	3.38	15.6	5.5	21.3	1734	1540.4	560	23.97	10.884	41.4	NA	1.58	8	2017	Literatures	Liang et al., 2017	Cenwang Old Mountain Reserve	363.56	252.652	69.4938	110.908	30.5062	0.438977
Broadleaved	106.379	24.405	0.9	19	3.38	15.6	5.5	21.3	1734	1540.4	560	20.2	15.094	36.4	NA	2	8	2017	Literatures	Liang et al., 2017	Cenwang Old Mountain Reserve	363.56	252.652	69.4938	110.908	30.5062	0.438977
Broadleaved	106.379	24.405	0.9	19	3.38	15.6	5.5	21.3	1734	1540.4	560	16.55	8.876	45.5	NA	1.83291	8	2017	Literatures	Liang et al., 2017	Cenwang Old Mountain Reserve	363.56	252.652	69.4938	110.908	30.5062	0.438977
Broadleaved	106.379	24.405	0.9	19	3.38	15.6	5.5	21.3	1734	1540.4	560	28.39	12.43	46.2	NA	1.76159	8	2017	Literatures	Liang et al., 2017	Cenwang Old Mountain Reserve	363.56	252.652	69.4938	110.908	30.5062	0.438977
Broadleaved	106.379	24.405	0.9	19	3.38	15.6	5.5	21.3	1734	1540.4	560	39.02	20.37	35.2	NA	0.53	8	2017	Literatures	Liang et al., 2017	Cenwang Old Mountain Reserve	363.56	252.652	69.4938	110.908	30.5062	0.438977
Broadleaved	106.379	24.405	0.9	19	3.38	15.6	5.5	21.3	1734	1540.4	560	15.57	12.054	33.7	NA	1.9	8	2017	Literatures	Liang et al., 2017	Cenwang Old Mountain Reserve	363.56	252.652	69.4938	110.908	30.5062	0.438977
Broadleaved	106.379	24.405	0.9	19	3.38	15.6	5.5	21.3	1734	1540.4	560	62.5	8.255	45.3	NA	1.4	8	2017	Literatures	Liang et al., 2017	Cenwang Old Mountain Reserve	363.56	252.652	69.4938	110.908	30.5062	0.438977
Broadleaved	106.379	24.405	0.9	19	3.38	15.6	5.5	21.3	1734	1540.4	560	8.78	13.85	38.1	NA	2	8	2017	Literatures	Liang et al., 2017	Cenwang Old Mountain Reserve	363.56	252.652	69.4938	110.908	30.5062	0.438977
Broadleaved	106.379	24.405	0.9	19	3.38	15.6	5.5	21.3	1734	1540.4	560	23.27	9.967	45.2	NA	1.05536	8	2017	Literatures	Liang et al., 2017	Cenwang Old Mountain Reserve	363.56	252.652	69.4938	110.908	30.5062	0.438977
Broadleaved	106.379	24.405	0.9	19	3.38	15.6	5.5	21.3	1734	1540.4	560	30.57	22.88	35.2	NA	2.90619	8	2017	Literatures	Liang et al., 2017	Cenwang Old Mountain Reserve	363.56	252.652	69.4938	110.908	30.5062	0.438977
Broadleaved	106.379	24.405	0.9	19	3.38	15.6	5.5	21.3	1734	1540.4	560	13.27	24.28	30.3	NA	1.58	8	2017	Literatures	Liang et al., 2017	Cenwang Old Mountain Reserve	363.56	252.652	69.4938	110.908	30.5062	0.438977
Broadleaved	106.379	24.405	0.9	19	3.38	15.6	5.5	21.3	1734	1540.4	560	31.81	23.68	36.2	NA	1.6	8	2017	Literatures	Liang et al., 2017	Cenwang Old Mountain Reserve	363.56	252.652	69.4938	110.908	30.5062	0.438977
Broadleaved	106.379	24.405	0.9	19	3.38	15.6	5.5	21.3	1734	1540.4	560	54.1	7.663	45.2	NA	0.873253	8	2017	Literatures	Liang et al., 2017	Cenwang Old Mountain Reserve	363.56	252.652	69.4938	110.908	30.5062	0.438977
Broadleaved	106.379	24.405	0.9	19	3.38	15.6	5.5	21.3	1734	1540.4	560	25.14	13.36	37.3	NA	1.72	8	2017	Literatures	Liang et al., 2017	Cenwang Old Mountain Reserve	363.56	252.652	69.4938	110.908	30.5062	0.438977
Broadleaved	106.379	24.405	0.9	19	3.38	15.6	5.5	21.3	1734	1540.4	560	36.07	28.65	30.4	NA	1.72	8	2017	Literatures	Liang et al., 2017	Cenwang Old Mountain Reserve	363.56	252.652	69.4938	110.908	30.5062	0.438977
Broadleaved	106.379	24.405	0.9	19	3.38	15.6	5.5	21.3	1734	1540.4	560	15.93	9.022	46.1	NA	1.72	8	2017	Literatures	Liang et al., 2017	Cenwang Old Mountain Reserve	363.56	252.652	69.4938	110.908	30.5062	0.438977
Broadleaved	106.379	24.405	0.9	19	3.38	15.6	5.5	21.3	1734	1540.4	560	31.9	8.851	42.1	NA	1.72	8	2017	Literatures	Liang et al., 2017	Cenwang Old Mountain Reserve	363.56	252.652	69.4938	110.908	30.5062	0.438977
Broadleaved	106.379	24.405	0.9	19	3.38	15.6	5.5	21.3	1734	1540.4	560	20.2	10.55	43.1	NA	1.7	8	2017	Literatures	Liang et al., 2017	Cenwang Old Mountain Reserve	363.56	252.652	69.4938	110.908	30.5062	0.438977
Broadleaved	106.379	24.405	0.9	19	3.38	15.6	5.5	21.3	1734	1540.4	560	13.94	12.44	47.1	NA	1.3	8	2017	Literatures	Liang et al., 2017	Cenwang Old Mountain Reserve	363.56	252.652	69.4938	110.908	30.5062	0.438977
Broadleaved	99.11	24.27	1.20838	14.4635	5.53326	20.1	5.4	22.3	1361	1816.07	1874	50	7.2	43	NA	0.88	7	2014	Literatures	Yang et al., 2014	Longling	282.49	211.774	74.9671	70.7155	25.0329	0.333919
Broadleaved	102.35	24.21	2.02392	13.5563	5.3381	18.4	5.4	20.6	956	1804.28	1345	30	7.2	49	NA	0.88	7	2014	Literatures	Yang et al., 2014	Eshan	397.19	279.978	70.4896	117.212	29.5104	0.41865
Broadleaved	101.85	24.17	2.15605	13.3514	5.38483	14.7	8	30.8	952.7	1821.98	3911	35.23	8.69565	41.96	NA	0.65	7	2014	Literatures	Si et al., 2014	Southwest latitudinal zone	394.55	279.929	70.9489	114.621	29.0511	0.409464
Broadleaved	111.74	24.14	1.52627	14.9008	4.53472	19.6	6.8	27.4	1972	1574.27	1200	28.9	27.92	32.081	NA	1.4	7	2017	Literatures	Hu et al., 2017	Quxi	371.21	313.312	84.403	57.8977	15.597	0.184792
Broadleaved	110.93	24.12	1.52939	14.8494	4.59739	20.4	10.1	27.9	1743	1590.16	1256	34.12	27.01	32.381	NA	0.68	7	2017	Literatures	Hu et al., 2017	Quxi	349.14	269.978	77.3265	79.1622	22.6735	0.293218
Broadleaved	101.85	24.11	2.16283	13.3622	5.37816	16.7	3.6	19.8	1078	1819.79	1784	63.795	8.653	47	NA	1.4	7	2014	Literatures	Yang et al., 2014	Xinping	351.04	248.25	70.7183	102.79	29.2817	0.41406
Broadleaved	102.75	24.1	2.23231	13.328	5.31102	14.4	7.9	31	870.3	1805.81	3911	88.09	8.77193	52.3	NA	0.88	7	2014	Literatures	Si et al., 2014	Southwest latitudinal zone	398.74	277.769	69.6617	120.971	30.3383	0.435509
Broadleaved	103.79	23.4	2.22446	13.6448	5.14241	9	3.2	15.6	1291	1752.86	2034	38	6.5	52	NA	1.2	7	2014	Literatures	Yang et al., 2014	Mengzi	405.24	271.705	67.048	133.535	32.952	0.49147
Broadleaved	103.53	23.17	1.81349	14.2812	5.09942	16.4	9.1	32.5	1621.4	1719.16	1917.4	12.7	9.80392	34	NA	1.31	7	2014	Literatures	Si et al., 2014	Southwest latitudinal zone	372.41	258.126	69.3122	114.284	30.6878	0.442747
Coniferous	115.8	40.5	4.472	10.6429	5.9	9.2	-8.6	22.9	493	2300	1770	27.62	33.5	23.7	NA	0.65	7	2013	Literatures	Xiao et al., 2013	Taiyue Mountain in Shanxi Province	223.06	148.159	66.4211	74.9011	33.5789	0.505545
Coniferous	115.8	40.5	6.165	8.98571	6.03	9.2	-8.6	22.9	493	2300	1770	27.58	31.1	30.8	NA	1.4	7	2013	Literatures	Xiao et al., 2013	Taiyue Mountain in Shanxi Province	223.06	148.159	66.4211	74.9011	33.5789	0.505545
Coniferous	115.8	40.5	3.299	9.31429	5.9	9.2	-8.6	22.9	493	2300	1770	19.59	15.1	38.6	NA	1.67	5	2013	Literatures	Yang et al., 2013	Tai-hang Mountains	223.06	148.159	66.4211	74.9011	33.5789	0.505545
Coniferous	115.8	40.5	3.933	8.14286	7.31	9.2	-8.6	22.9	493	2300	1770	19.53	28.7	32.8	NA	0.65	7	2013	Literatures	Xiao et al., 2013	Taiyue Mountain in Shanxi Province	223.06	148.159	66.4211	74.9011	33.5789	0.505545
Coniferous	115.8	40.5	4.472	10.6429	5.9	9.2	-8.6	22.9	493	2300	1770	19.35	23.5	31.8	NA	0.65	7	2013	Literatures	Xiao et al., 2013	Taiyue Mountain in Shanxi Province	223.06	148.159	66.4211	74.9011	33.5789	0.505545
Coniferous	115.8	40.5	3.419	8.44286	6.05	9.2	-8.6	22.9	493	2300	1770	19.2	32.8	31.7	NA	0.32	7	2013	Literatures	Xiao et al., 2013	Taiyue Mountain in Shanxi Province	223.06	148.159	66.4211	74.9011	33.5789	0.505545
Coniferous	115.8	40.5	3.419	8.44286	6.05	9.2	-8.6	22.9	493	2300	1770	18.47	19	35.5	NA	1.2	7	2013	Literatures	Xiao et al., 2013	Taiyue Mountain in Shanxi Province	223.06	148.159	66.4211	74.9011	33.5789	0.505545
